# Supplementary material for: A reporter system coupled with high-throughput sequencing unveils key bacterial transcription and translation determinants
Source: PubMed Central journal article supplement (PMC5573727; doi:10.1038/s41467-017-00239-7), 2017-08-28
Supplement: 41467_2017_239_MOESM1_ESM.pdf [file 41467_2017_239_MOESM1_ESM.pdf]

File name: Supplementary Information

Description: Supplementary figures, supplementary tables, supplementary notes and supplementary references.

File name: Supplementary Data 1

Description: Oligonucleotides used in this study

File name: Supplementary Data 2

Description: Top 3 quantification of proteins from LC-MSMS data

File name: Supplementary Data 3

Description: Enriched sequences in the -17 to -13 positions of productive promoters

File name: Supplementary Data 4

Description: Number of transcripts with different transcription start sites

File name: Supplementary Data 5

Description: Pearson correlation between mRNA folding energy and DAMRatio

File name: Supplementary Data 6

Description: 5'-UTR translation strength prediction power from individual features

File name: Peer review file

Description:

**A**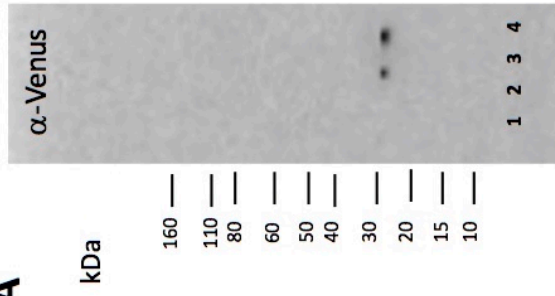**B**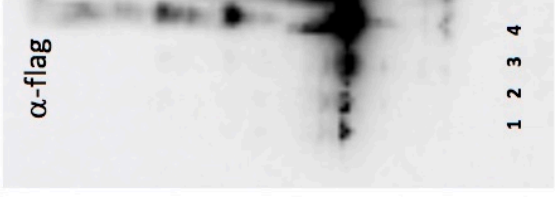

WB quantification

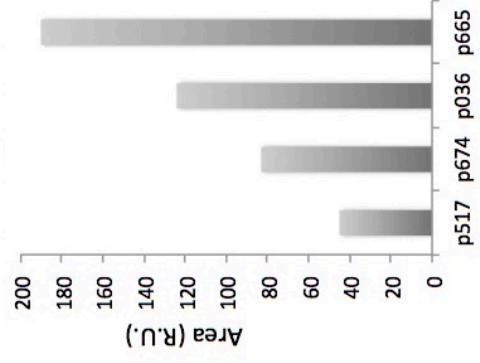

MS quantification

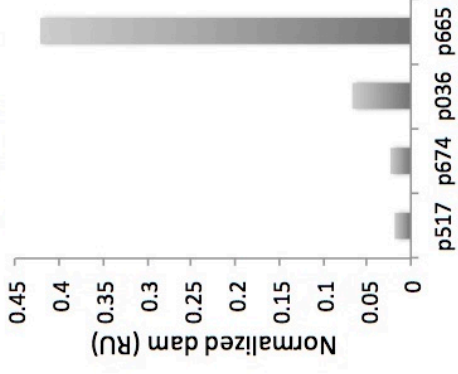**C**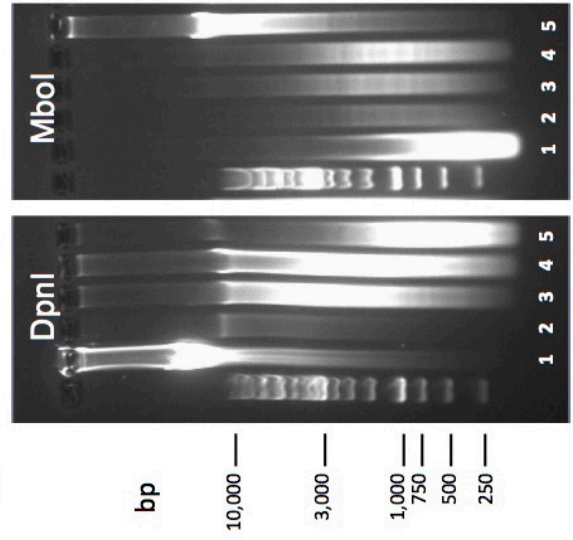

genomic GATC 1

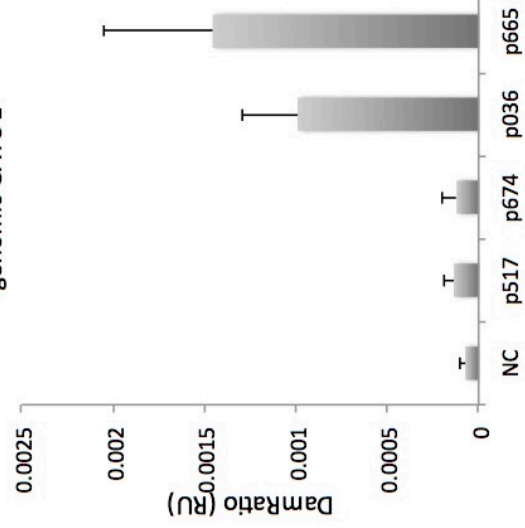

genomic GATC 2

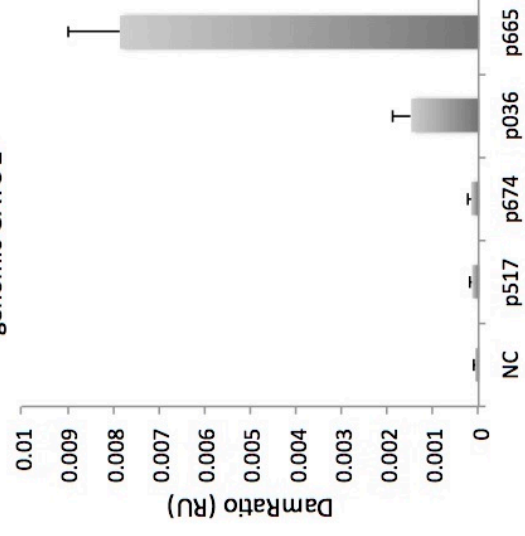

**Supplementary Figure 1. Proof of principle.** A set of promoters of increasing strengths (from left to right in each panel) that are routinely used in the lab were chosen for the proof of principle (see also Methods). **(a)** The four endogenous promoters (1: MPN517, 2: MPN674, 3: MPN036 and 4: MPN665) were cloned in front of a YFP-Venus reporter, expressed in *M. pneumoniae* and proteins were extracted and probed with anti-GFP antibody. The molecular weight ladder was Novex Sharp Pre-stained Protein Standard (Thermo Fisher Scientific). **(b)** The same promoters were cloned to drive dam-Flag expression. In the left panel, the anti-Flag tag Western blot is shown. The middle panel shows the quantification of the Dam signal. The right panel is the quantification by LC-MSMS (normalized with MPN001, see Supplementary Data 2 and copy number in Supplementary Table 6). **(c)** Genomic DNA was extracted from cells shown in **(b)** and 1  $\mu$ g was independently digested with either DpnI (cuts G<sup>m</sup>ATC) or MboI (GATC), before running it on a 1% agarose gel (left panels, 1: Non-expressing Dam control; 2: MPN517, 3: MPN674, 4: MPN036 and 5: MPN665 promoters). The molecular weight ladder was 1kb Gene Ruler from MBI-Fermentas. GATC methylation was determined by doing qPCR of GATCs at two different locations in the genome (genomic GATC-1 is at coordinate 19,580 and GATC-2 at 170,908) of the two digestions shown in the gels (ratio of MboI/DpnI is plotted in the two right panels; AU: arbitrary units). As shown, Dam protein and methylation correlate well. This means that the DAMRatio reflects the protein abundance and is therefore a quantitative reporter. Error bars show the standard deviation (n=3).

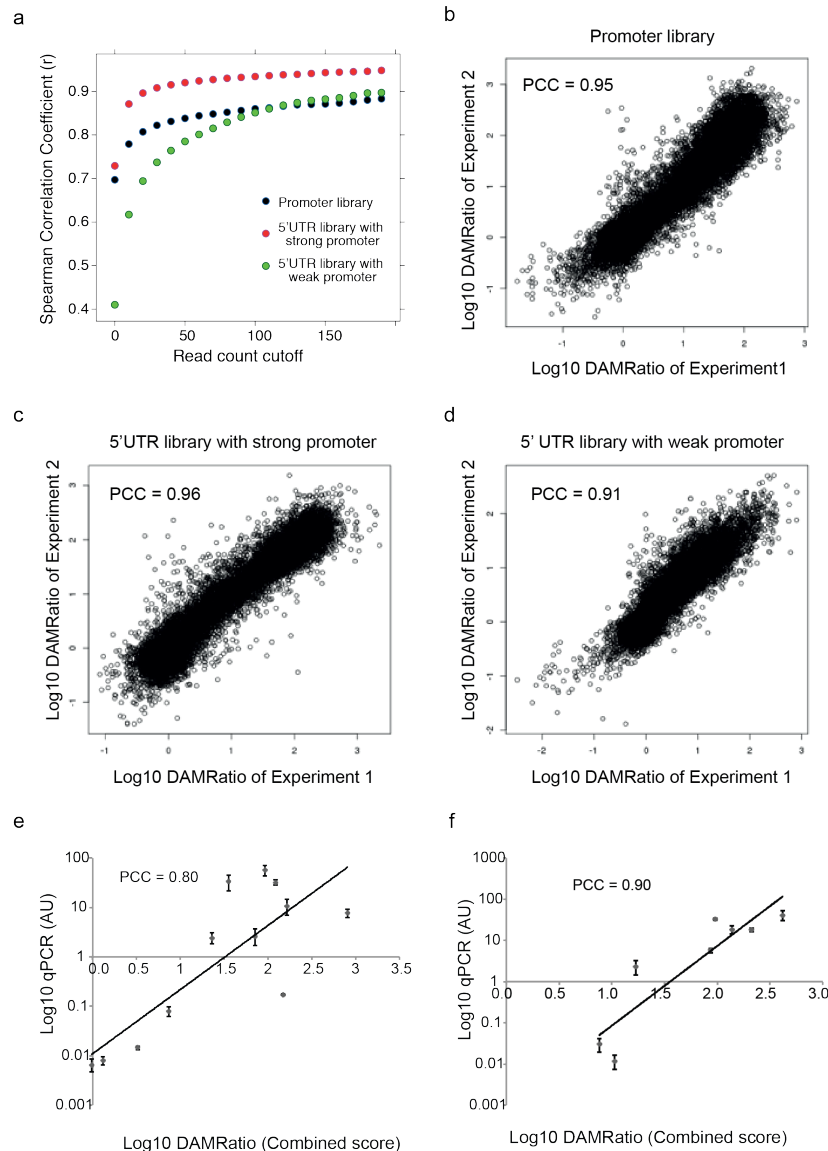

**Supplementary Figure 2. Correlation between two screening replicas and validation of DAMRatios by quantitative PCR.** (a) Correlation between two biological replicates according to read count cutoff (see Supplementary Table 4). (b, c, d) The correlations of the DAMRatios between two biological replicates when using a read count cutoff of 100. Transcription study and 5'-UTR study with strong and weak promoters are highly reproducible. The Pearson Correlation Coefficient (PCC) between replicates is reported. (e, f) DAMRatios reflect the Dam activity validated by methylation-sensitive qPCR. (e) From the transcription study, twelve selected promoters were individually cloned and validated (Supplementary Table 5). DNA activity was measured by qPCR (x-axis). (f) DAMRatio indicates the activity of Dam estimated from the Translation study; eight selected 5'-UTRs with the strong promoter were individually cloned (Supplementary Table 5). (e, f) The PCC between replicates is reported. qPCR values are in arbitrary units (AU). See sequences in Supplementary Table 2. Error bars show the standard deviation (n=3).

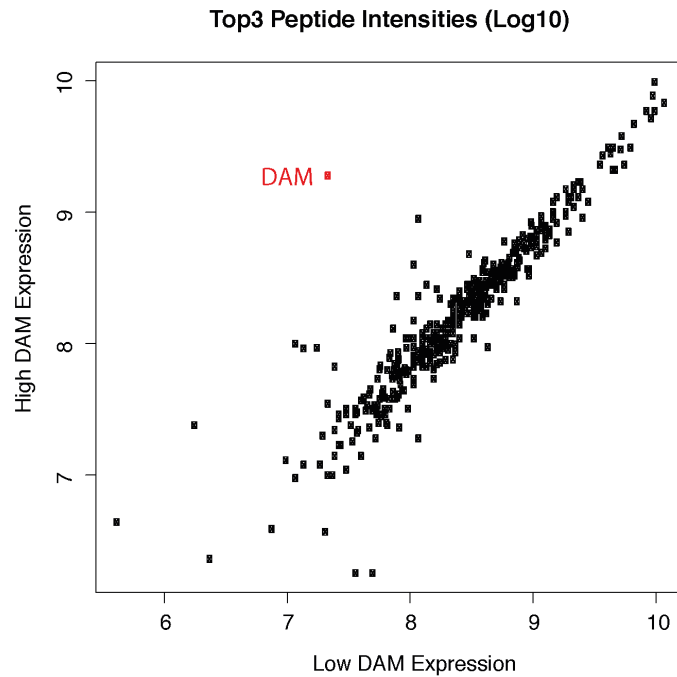

**Supplementary Figure 3. Proteome comparison between low and high expression of Dam protein.** We compare the log<sub>10</sub> of the average Top 3 peptides intensities of protein extracts from low (promoter p4, estimated ~1 protein copy per cell) and high expression (Promoter p1, estimated ~2,300 protein copies per cell) of Dam protein constructs (see Supplementary Tables 2 and 5). The red spot is the Top 3 peptides intensities of Dam protein. When we take three constructs expressing high Dam with similar values (p6, UTR1 and 2) and three that have no detectable levels (p5, p12 and UTR8), we obtained only 34 proteins with a *P*-value lower than 0.05. This within the noise (with 494 proteins and a false discovery rate, FDR of 0.1, we could get 20 proteins).



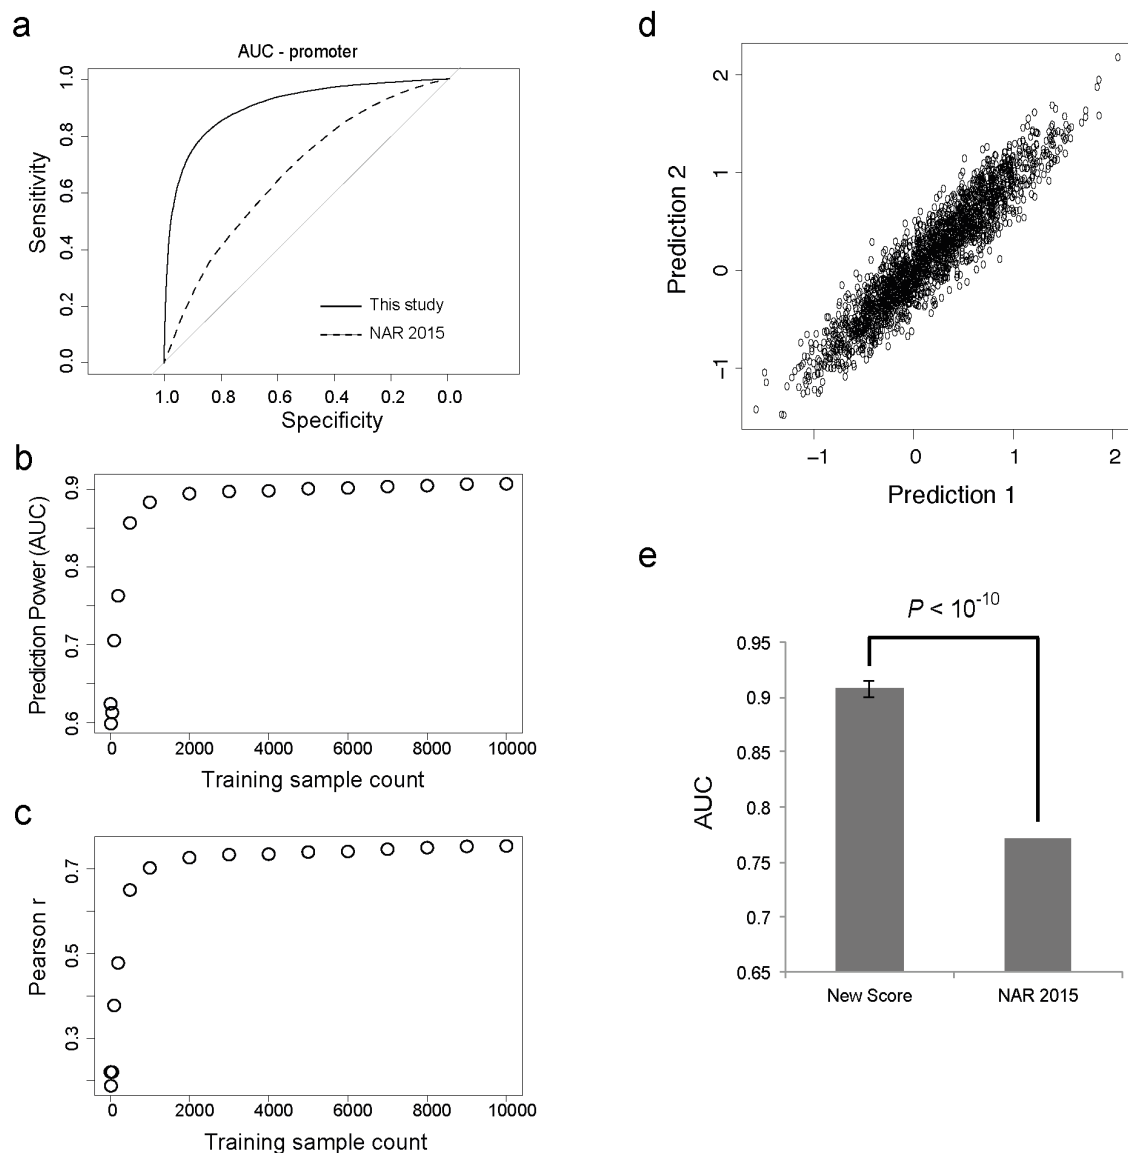

**Supplementary Figure 5. Prediction of promoter strength and training sample saturation analysis.** (a) Promoter prediction power of this study and of the previously published random forest scoring method<sup>6</sup>. (b) Training sample saturation analysis with prediction power (AUC). We used different number of training sets and the same test set for the analysis. The prediction power (AUC) becomes saturated when the number of training samples reaches 2,000. (c) Training sample saturation analysis with Pearson correlation ( $r$ ). The Pearson correlation coefficient between predicted promoter strengths and observed DAMRatios also becomes saturated when the number of training samples reaches 2,000. (d) Comparison between two predictions (from support vector regression) of promoter strength using different training sets but the same test set. The correlation between the two predictions is  $r = 0.98$ . The number of sequences used to train and test were 5,000 and 2,000, respectively. (e) Comparison of the promoter prediction accuracy with our previous predictor (NAR 2015<sup>6</sup>) from promoter-like

sequences (the cases containing the TANAAT Pribnow motif). The promoters and non-promoters are the same test set as in the published predictor<sup>6</sup>, but contain the TANAAT sequence. Error bars show the standard deviation.



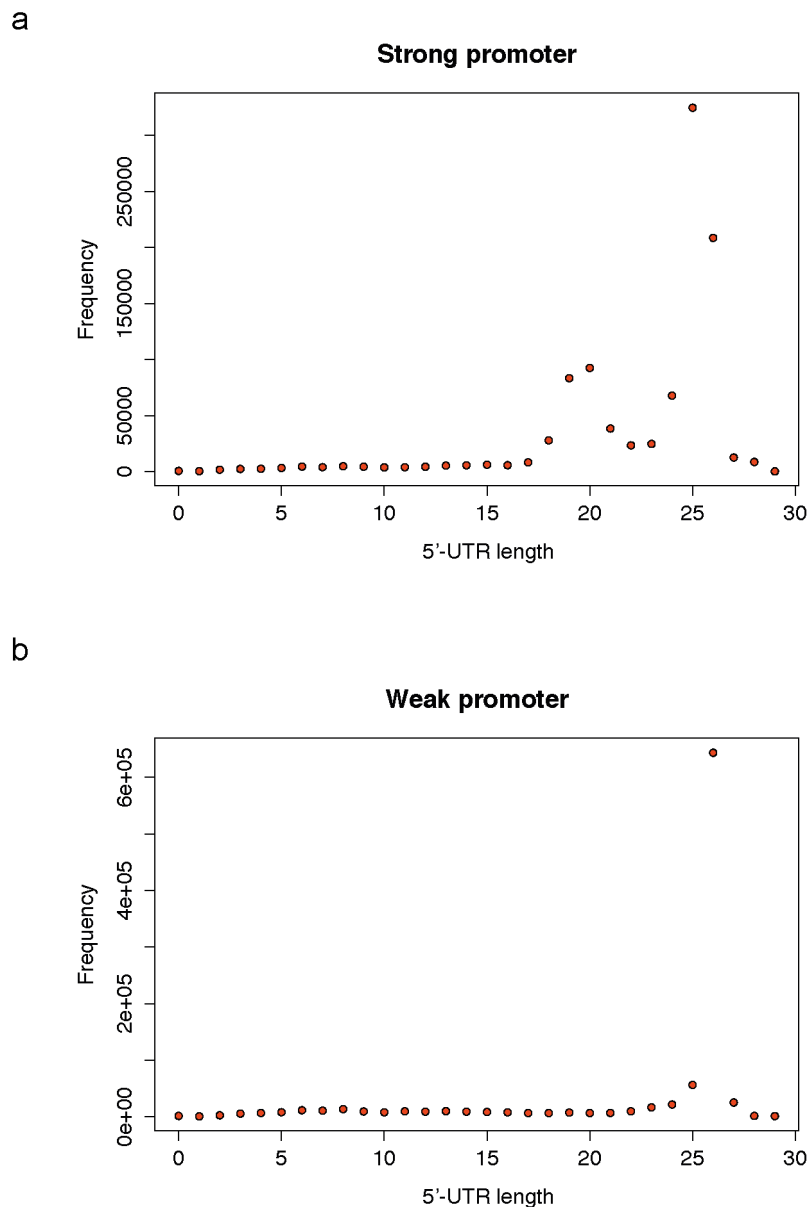

**Supplementary Figure 6. 5'-UTR length distributions.** (a) 5'-UTR lengths estimated from RNA-seq of the strong promoter screen. The majority of 5'-UTRs are 25 or 26 nt long. There is a small fraction of mRNAs however, that have 5'-UTRs of 20 nt, possibly arising from transcription of an alternative Pribnow box within the strong promoter. (b) 5'-UTR lengths estimated from RNA-seq of the weak promoter screen. In this case, transcripts with 26 nt 5'-UTRs were the predominant species found.

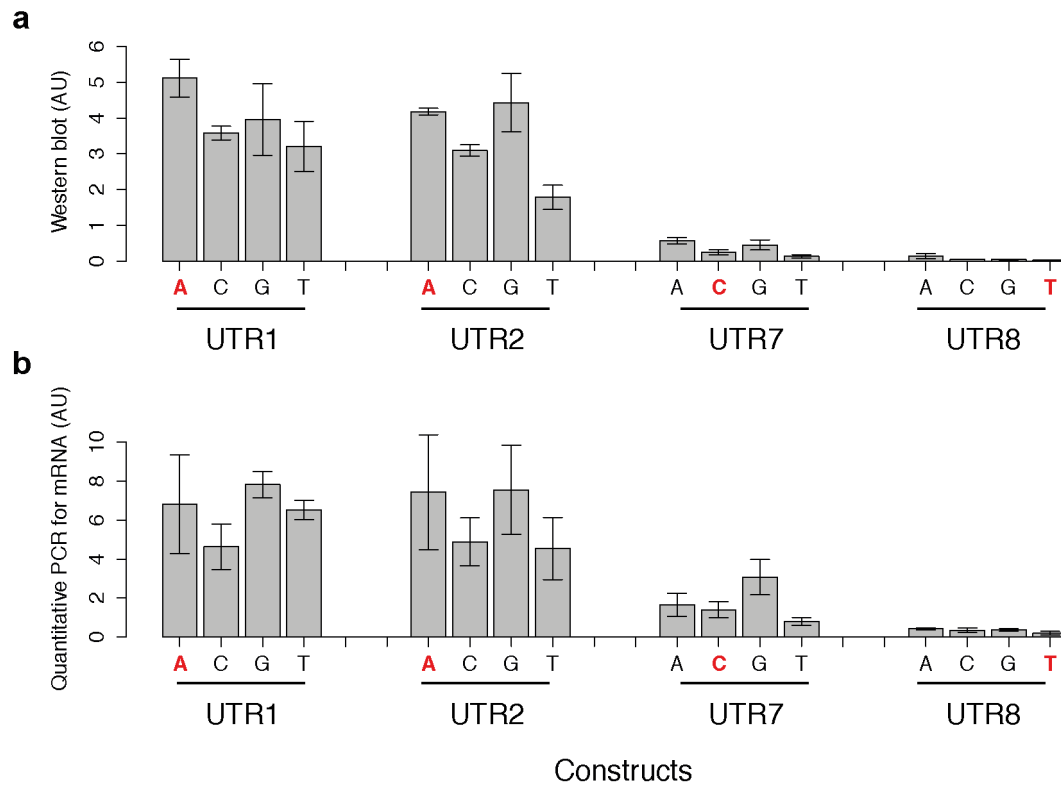

**Supplementary Figure 7. Protein and mRNA abundance changes in function of the TSS.**

(a) Western blot intensities of all variant constructs (see Supplementary Tables 1, 2 and 12a).

(b) mRNA abundance from quantitative PCR (see Supplementary Table 12a). AU means

Arbitrary Units. (a, b) All mutants are driven by the strong promoter (Syp32, where N7 is a T;

natural +1 position in the mRNA) and the mutated base is at N8. The original bases are

indicated in bold red font. Note that the original UTR1 and UTR2 have high DAMRatios, while

the original UTR7 and UTR8 have lower DAMRatios. In general, A and G bases are favored for

higher mRNA and protein levels. Error bars show standard deviation (n=3).

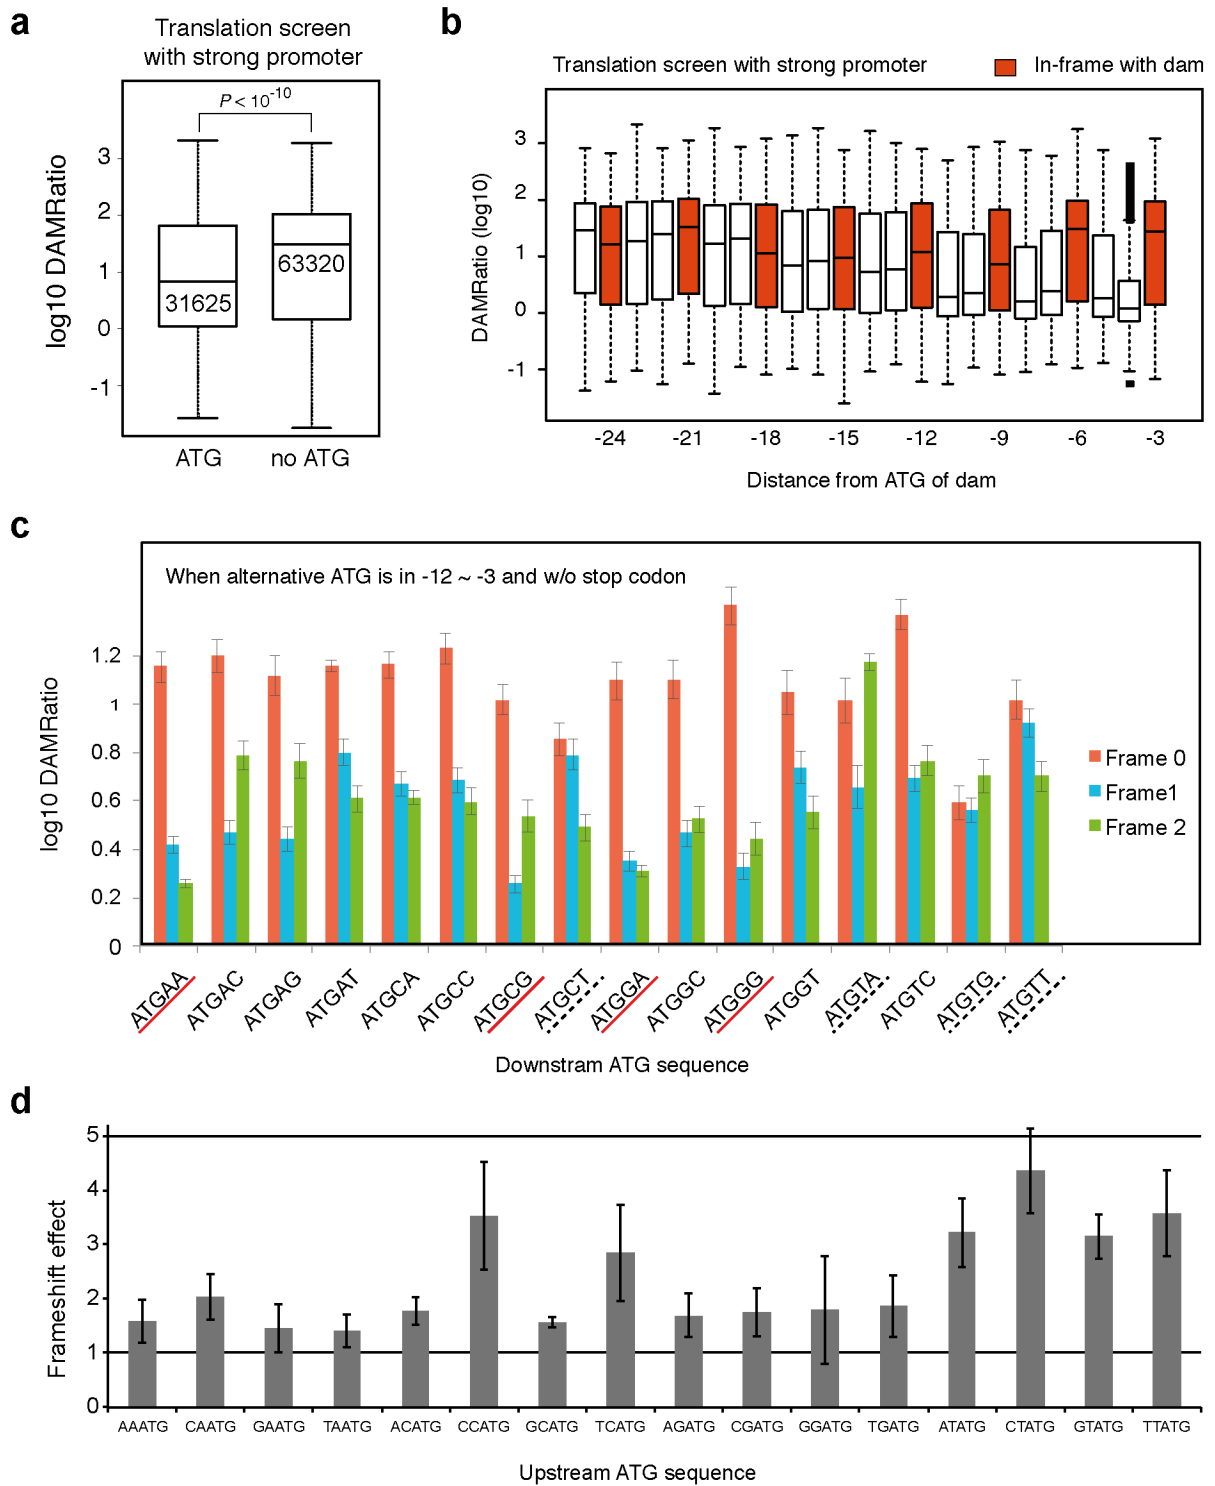

**Supplementary Figure 8. The effect of alternative translation start sites.** (a) Alternative translation start sites in the 5'-UTR systematically reduce the DAMRatio. "ATG" and "no ATG" depict the DAMRatio distributions of 5'-UTRs having alternative ATGs or not, respectively. (b) The frame-shift effect of alternative 5'-UTR translation start sites (ATG) on translation efficiency. When an ATG is located between positions -25 and -13, there is no significant reduction of translation efficiency by the alternative ATG. In contrast, when an ATG is located between

positions -12 and -3, the translation of the correct Dam frame is significantly reduced, but only when the ATG is located out-of-frame with respect to the actual ATG. **(c)** The effects of alternative translation start sites and their downstream sequences. The frame-shift effect is dependent on the down-stream nucleotides of the alternative ATG. For example, ATGAA and ATGGG have significantly different translation rates according to their frame, whereas ATGTT and ATGTG have similar translation rates regardless of their frame. **(d)** The effects of alternative translation start sites and their upstream sequences. The frame-shift effect is defined by:  $\text{DAMRatio of in-frame} / \text{DAMRatio of out-of-frame}$ . **(c, d)** All analyses were done removing any sequences bearing stop codons (TAA and TAG). Error bars show standard error.

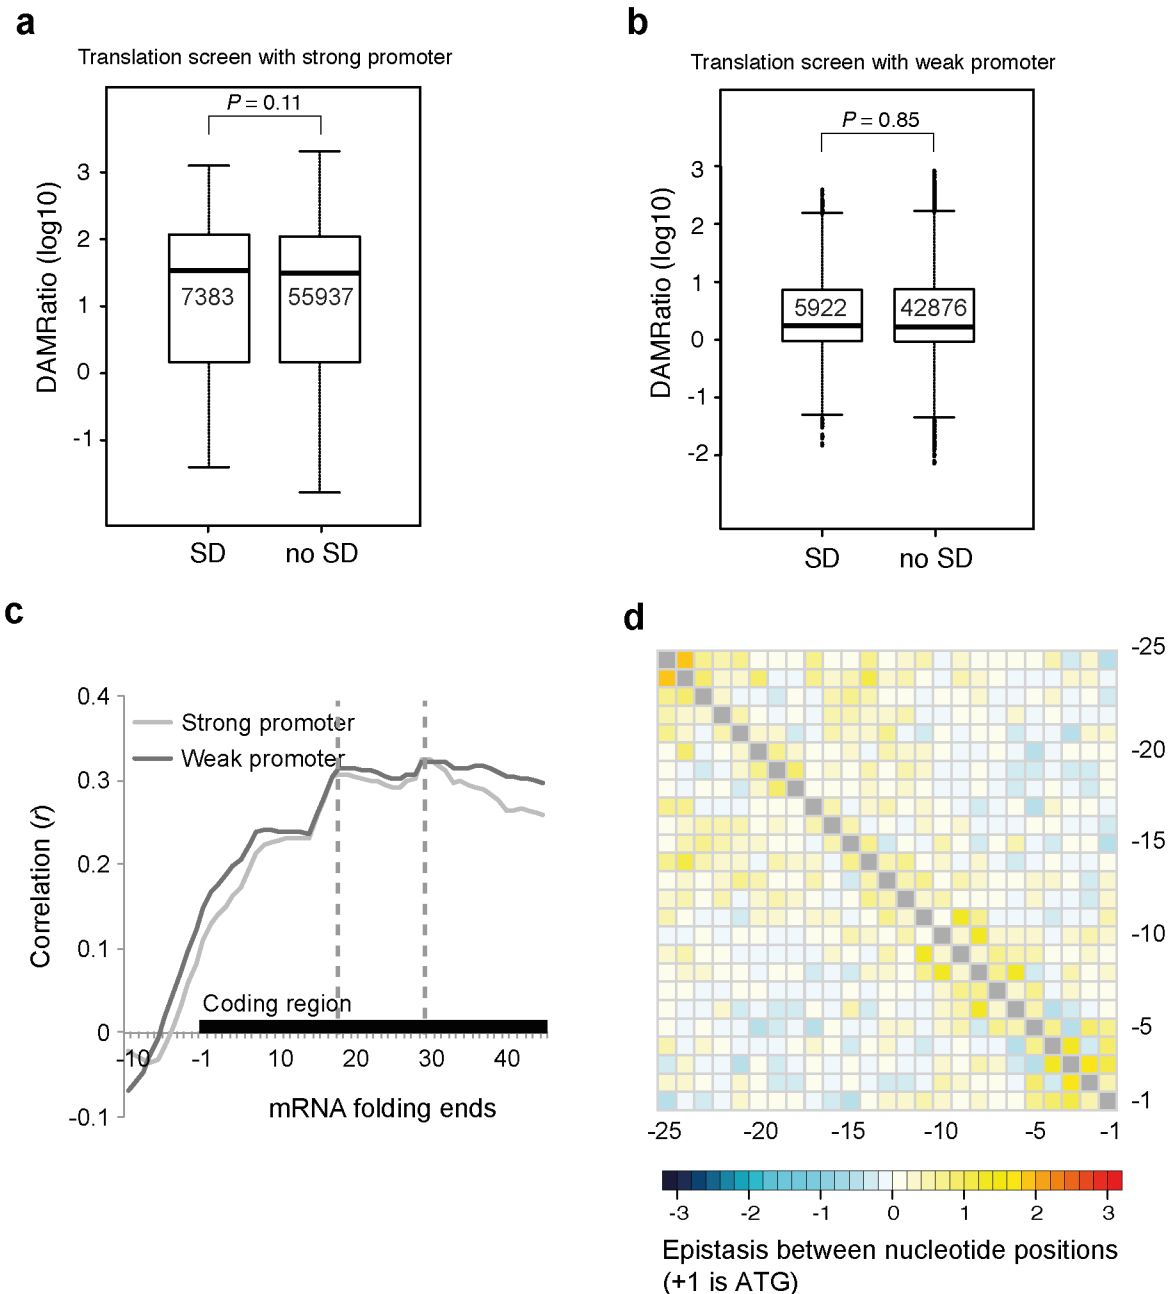

**Supplementary Figure 9. The effect of various 5'-UTR features on translation.** (a, b) DAMRatios according to the presence of Shine-Dalgarno (SD)-like sequences (GAGG, GGAG, AGGA and GAAG) in the 5'-UTRs. Only SDs located up to base -20 before the ATG were considered. SD sequences were scanned in the strong (a) and weak promoter screens (b). Sequences having alternative ATGs in their 5'-UTR were excluded from the analysis. (c) Influence of universal RNA structural features on translation efficiency. With the mRNA folding start position fixed at -25, the end position of folding was varied from position -10 to +45 in order to identify folding regions (see Supplementary Data 5). An increase in the correlation between folding energy and Dam level (0.3 for weak and 0.32 for strong promoter) was observed until it reached a plateau after nucleotide +18. (d) Epistatic interactions between nucleotide positions of the 5'-UTRs from the weak promoter screen (see Methods).

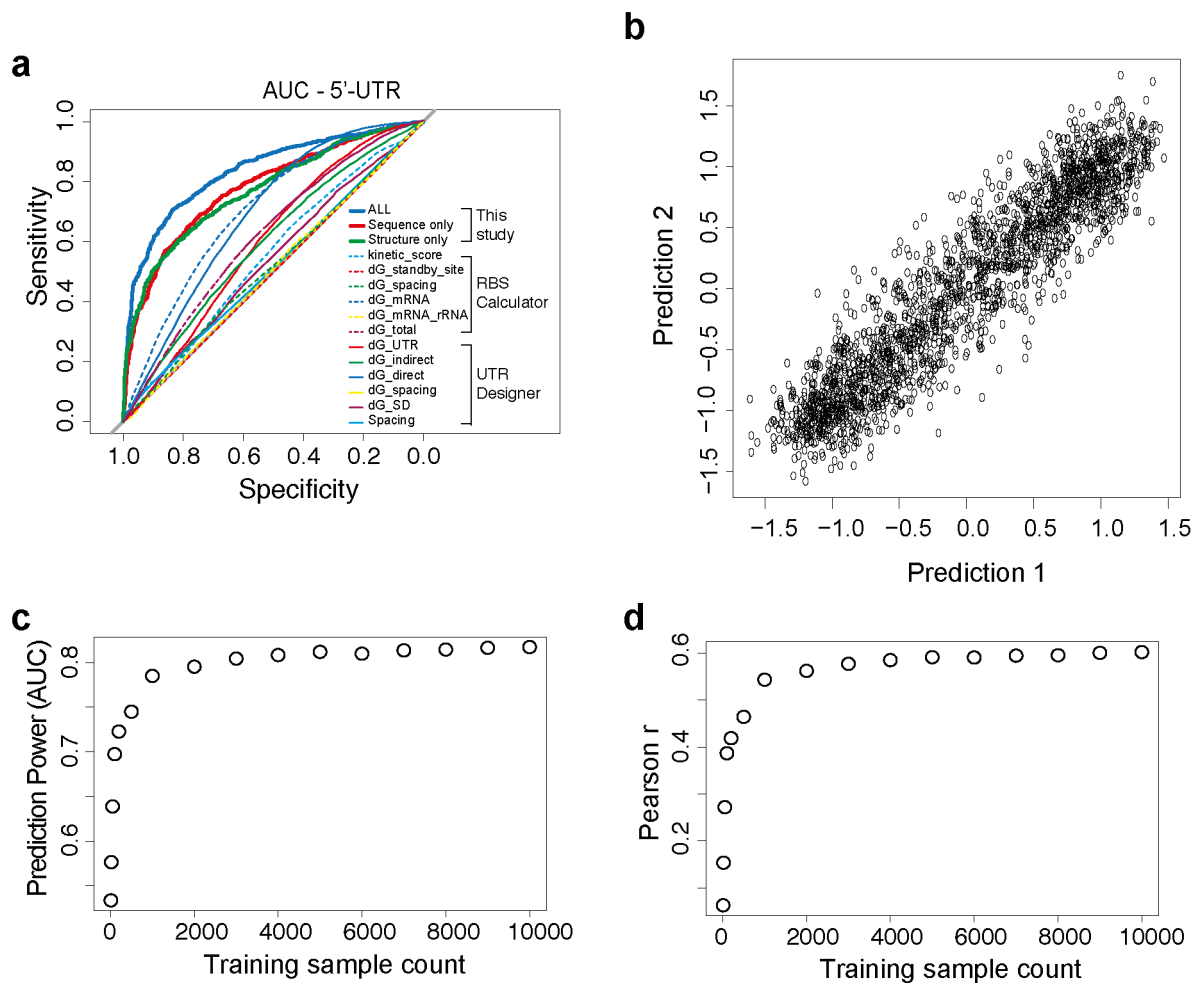

**Supplementary Figure 10. Prediction of 5'-UTR translation efficiency and training sample saturation analysis. (a)** 5'-UTR translation efficiency prediction power of this study and the two well-known predictors, RBS Calculator and UTR Designer. **(b)** Comparison of two translation efficiency predictions using different training sets with the same test set. The correlation between the two predictions was  $r = 0.93$ . The number of sequences used to train and test were 5,000 and 2,000, respectively. All the sequences in the test and training sets are different. **(c)** Training sample saturation analysis with prediction power (AUC). We used a different number of training sets and the same test set for the analysis. **(d)** Training sample saturation analysis with Pearson correlation ( $r$ ). **(c, d)** The prediction power (AUC) and Pearson correlation coefficient between predicted promoter strengths and observed DAMRatios become saturated when the number of training samples reaches 2,000.

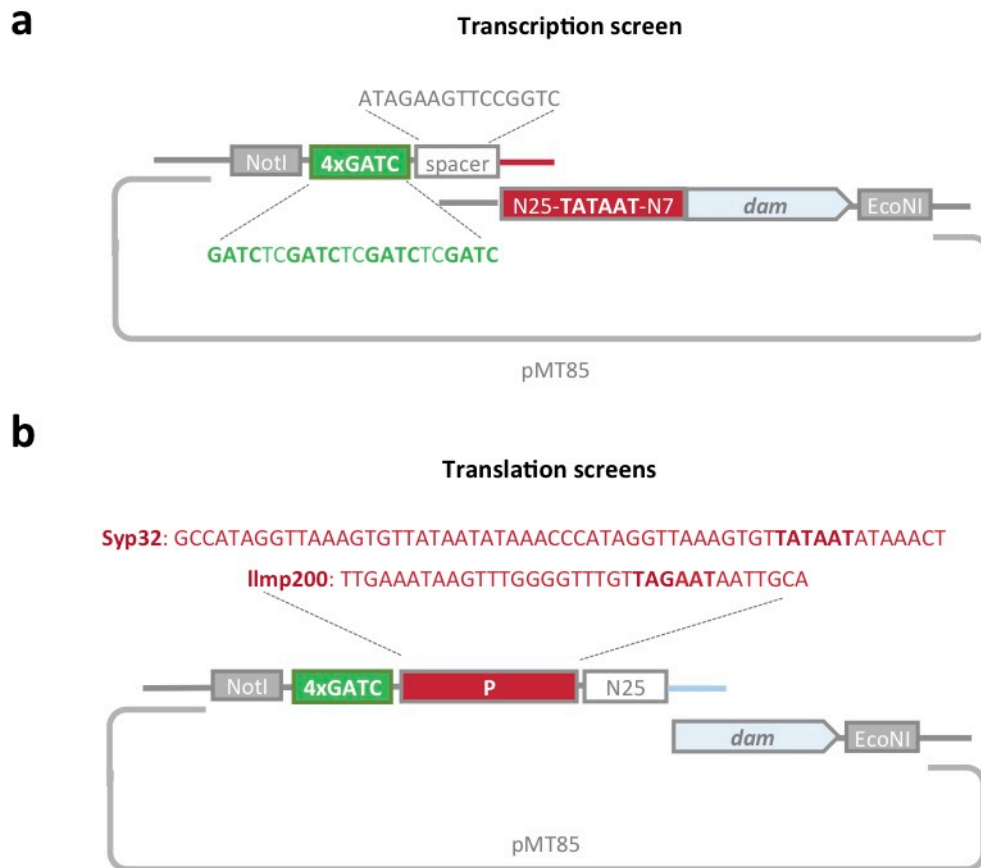

**Supplementary Figure 11. Gibson assembly cloning of the screening constructs.** A 3-fragment Gibson Assembly (GA) mix was prepared with a NotI-EcoNI cut vector, a linker and a PCR product. **(a)** In the transcription screen, a spacer was included in order to avoid methylation interfering with RNA polymerase binding to the promoter. **(b)** In the translation screen, there are actually 2 GAs, one with a strong (Syp32) and the other with a weak (Il\_mp200) promoter (see Methods). The overlapping regions are shown one over the other.

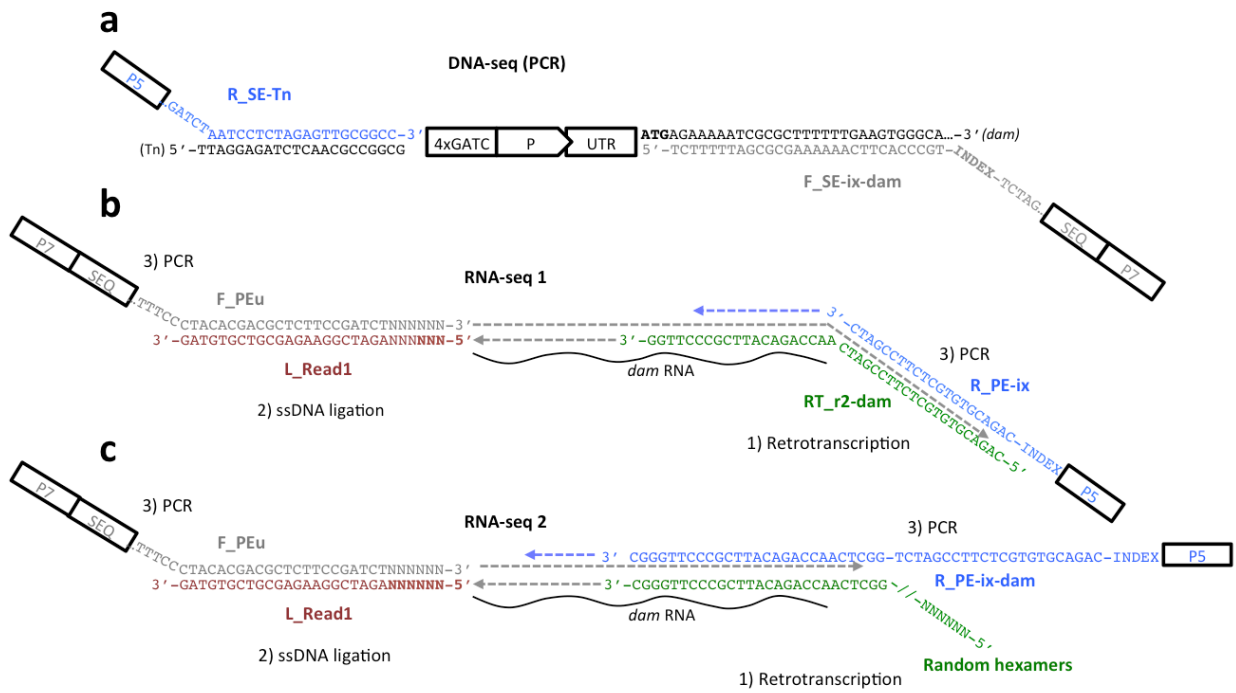

**Supplementary Figure 12. Library sequencing scheme.** (a) DNA-seq was performed by PCR amplification of the screen cassette. The custom PCR oligos included the Illumina sequencing, flow-cell binding and index sequences. (b) RNA-seq was possible only for the 5'-UTR screen. The first protocol is a variation of SHAPE-seq that includes a specific amplification of the 5' *dam* mRNA. There was an additional enrichment step after the RT (see Methods). (c) The second RNA-seq approach uses standard RT with random hexamers, and a *dam*-specific PCR step (see Methods).



a

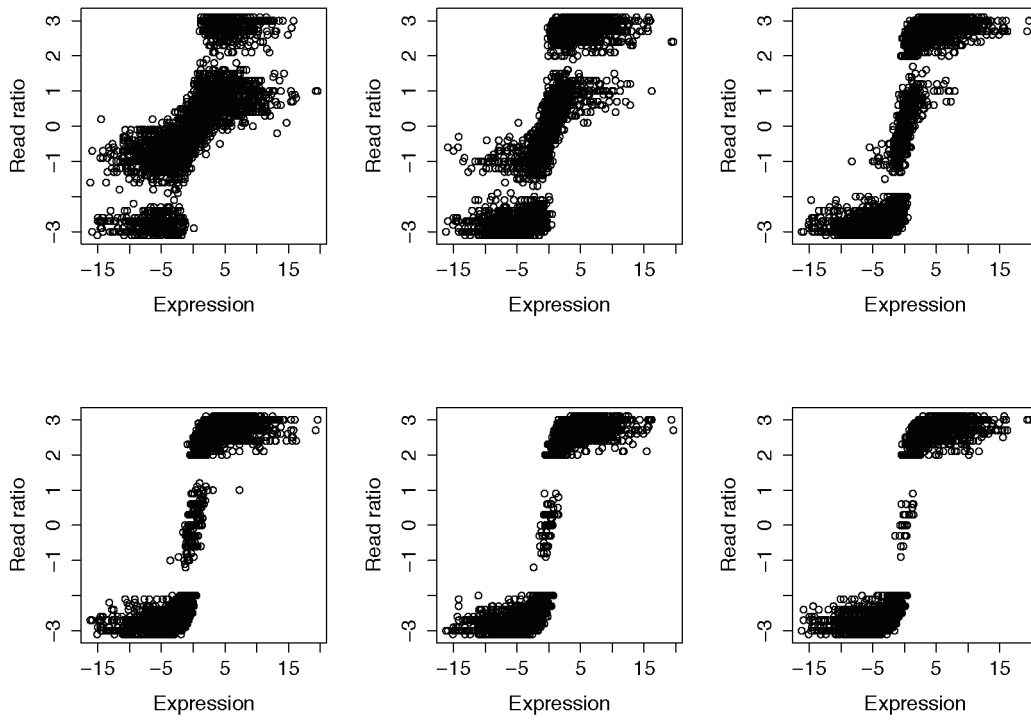

b

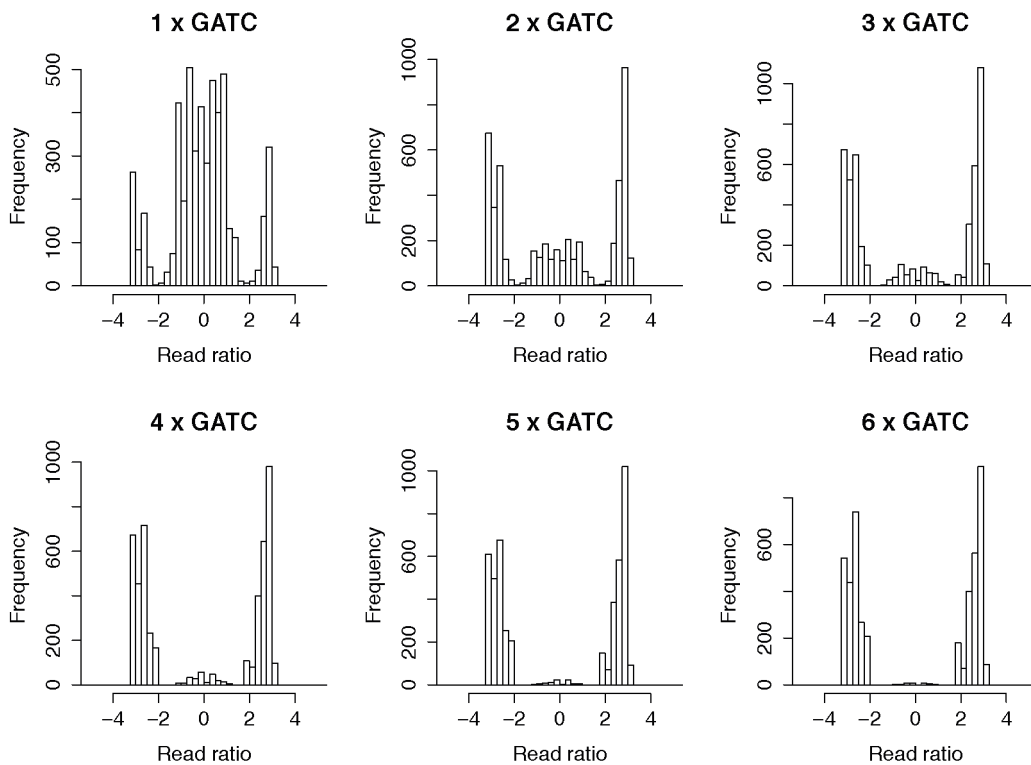

**Supplementary Figure 13. Simulation results of the read ratio distribution of Dam activity.**

(a) Correlation of gene expression and simulated DAMRatio. (b) Distribution of simulated DAMRatios according to number of GATC sites. The input distribution of gene expression was assumed to follow a normal distribution. Trimodal distributions with various proportions of the

second peak were obtained depending on the number of GATC sites. The efficiencies of both methylation-sensitive enzymes were set as 95% and 10 PCR cycles were considered. The initial number of isogenic constructs in the population was set as 10 with 1 standard deviation (Frequency in Arbitrary Units).

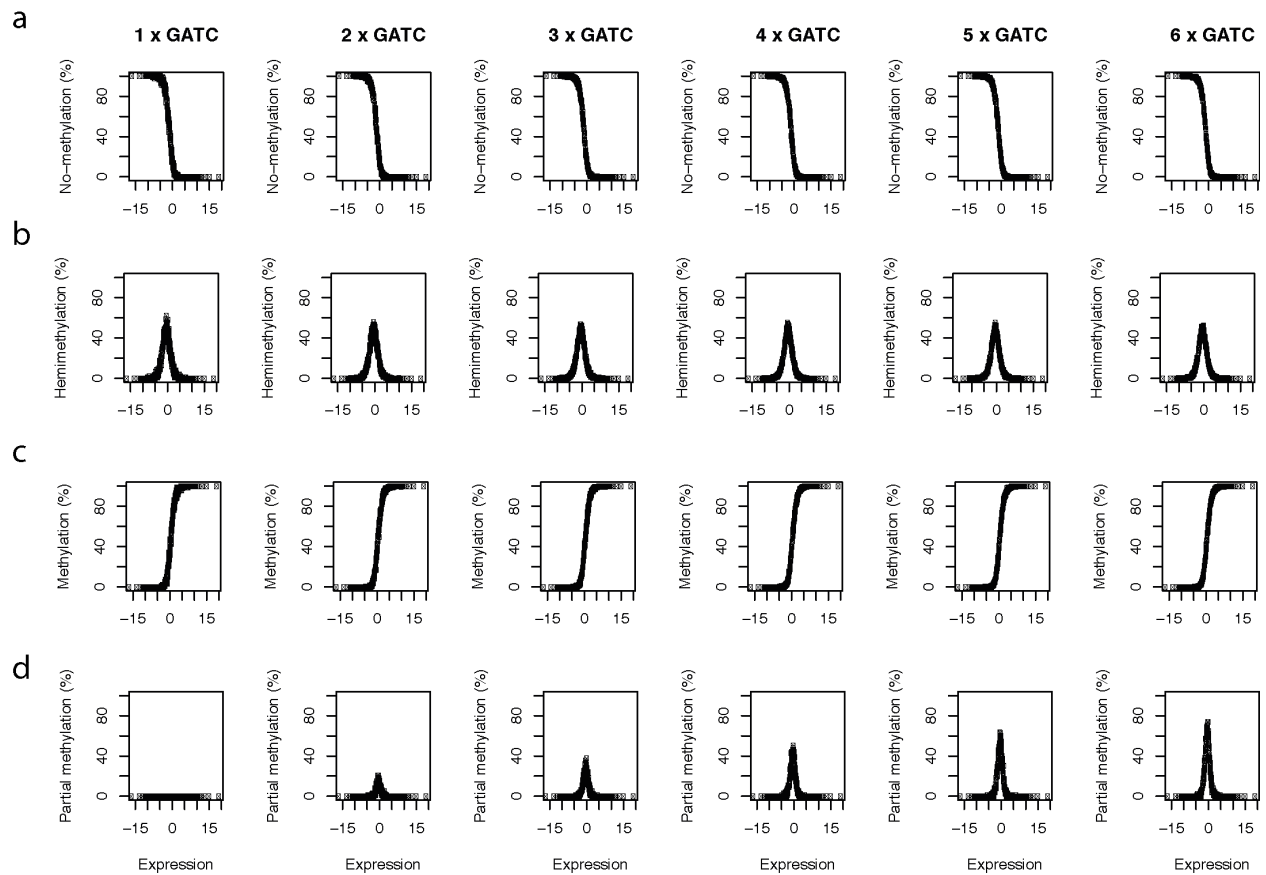

**Supplementary Figure 14. Simulation results of the methylation status of GATC sites according to Dam expression.** (a) Probability of no methylation per site. (b) Probability of hemimethylation per site. (c) Probability of no methylation per site. (d) Probability of partial methylation of GATC sites. The values of Dam expression are shown in the X axis in arbitrary units. The larger the number of GATC sites, the higher chance to have partial methylation under intermediate Dam expression values (near 0). To simulate the hemimethylated DNA, the methylation probability depending on Dam expression (arbitrary unit) was considered in each strand separately. To show statistically stable results for the figure, the initial number of isogenic constructs in the population was set as 100 with 1 standard deviation (frequency in Arbitrary Units).

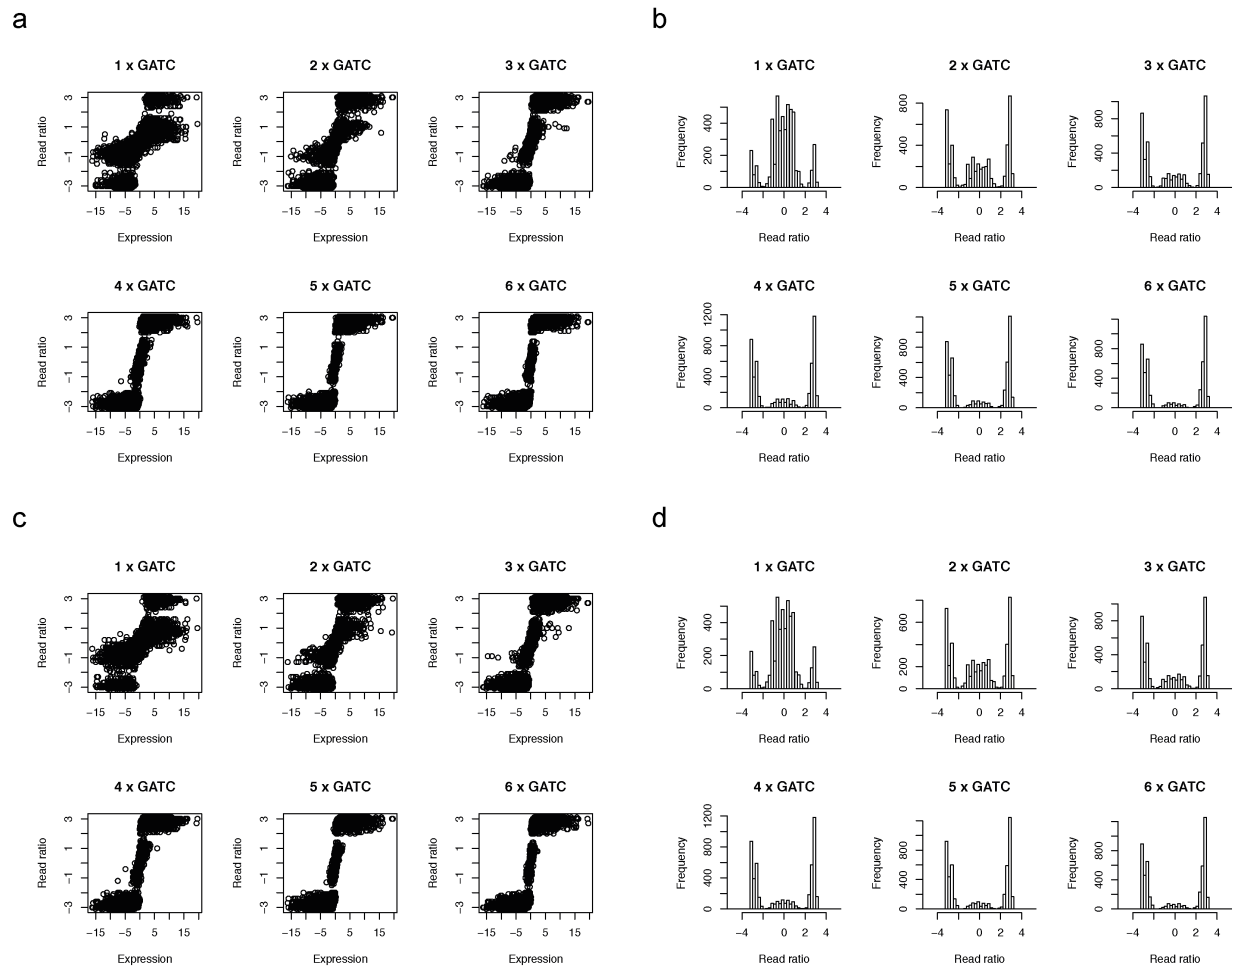

**Supplementary Figure 15. Simulation results of the read ratio distribution of Dam activity considering hemimethylation.** (a, c) Correlation of gene expression and simulated DAMRatio. (b, d) Distribution of simulated DAMRatios according to number of GATC sites. (a, b) When DpnI and MboI can cut 2% of hemimethylated DNA. (c, d) When DpnI can cut (2% activity) but MboI cannot cut hemimethylated DNA. All the simulation procedures were the same as in Supplementary Fig. 13 except for including hemimethylated DNA status and corresponding enzyme activity. To consider hemimethylated DNA the methylation probability depending on Dam expression (arbitrary unit) was considered independently for each strand.

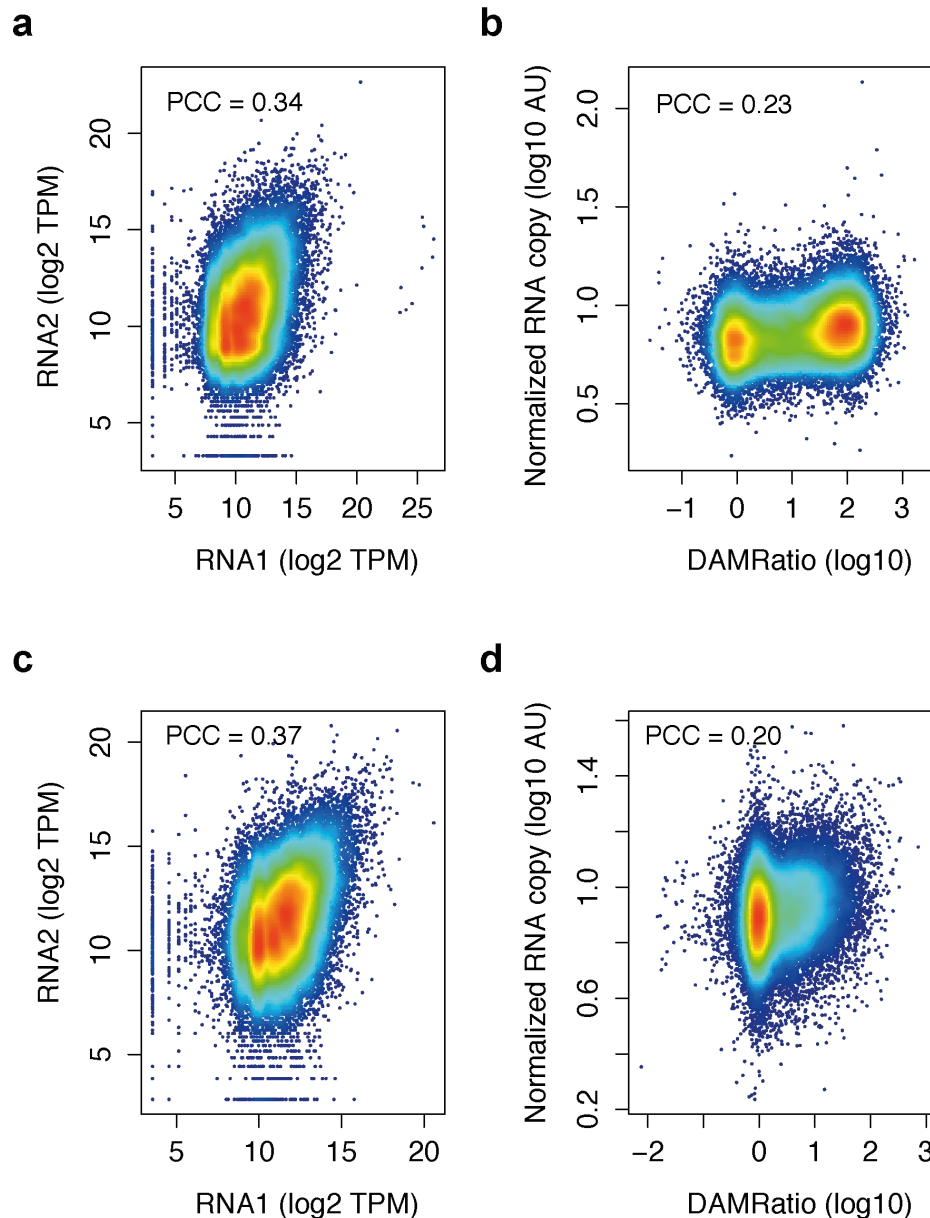

**Supplementary Figure 16. Comparison of DAMRatios and mRNA copy numbers in 5'-UTR libraries having strong promoter and weak promoters. (a, b) 5'-UTR library with strong promoter setup. (c, d) 5'-UTR library with weak promoter setup. (a, c) mRNA copy numbers were obtained from two Dam-specific RNA-seq experiments ("RNA1" and "RNA2"). Two different RNA-seq experiments significantly correlated (both cases  $P < 2.2 \times 10^{-16}$ ). (b, d) The RNA copy numbers were normalized by DNA copy numbers. Correlation of DAMRatio and mRNA copy number is also significant (both cases  $P < 2.2 \times 10^{-16}$ ). (a, b, c, d) The "heat" colored blue to red corresponding to the plotting density. The Pearson Correlation Coefficient (PCC) between replicates is reported.**

## Supplementary Table 1. Plasmids used in this study

Vectors, fragments and cloning strategy are indicated. For PCR, genomic DNA was used as template. Clones follow an internal plasmid codification system. V means vector and F means fragment. # pMT85-tuf->Venus (R70-3) was published in Yus *et al.*, 2012. pGEM-T Easy was purchased from Promega. Primers are listed in Supplementary Data 1.

| Project                        | Short       | Vector  | V Restriction | F 1     | F Restriction | Forward oligo | Reverse oligo | F 2 | Forward oligo | Reverse oligo | Strategy    | Clone     |
|--------------------------------|-------------|---------|---------------|---------|---------------|---------------|---------------|-----|---------------|---------------|-------------|-----------|
| pMT85-tuf->MCS                 | p665-Venus  | R70-3#  | KpnI+EcoNI    | Linker  | KpnI+EcoNI    | F_MCS_pMT     | R_MCS_pMT     |     |               |               | Linker      | E240-2    |
| pMT85-p674-Venus               | p674-Venus  | R70-3#  | NotI+Acc65I   | Linker  |               | F_ldhp1_Not   | R_ldhp1_Acc65 |     |               |               | Linker      | E369-22   |
| pGEM-T-Easy-NotI-p036-Acc65I   |             | pGEM-T  |               |         |               | F_p036_Not    | R_p036_Acc65  |     |               |               | AT cloning  | E386-5    |
| pMT85-p036-Venus               | p036-Venus  | R70-3#  | NotI+Acc65I   | E386-1  | NotI+Acc65I   |               |               |     |               |               | Restriction | E384-7    |
| pMT85-p517->Venus              | p517-Venus  | R70-3#  | NotI+Acc65I   | Linker  | NotI+Acc65I   | F_p517_Not    | R_p517_Acc    |     |               |               | Linker      | E458-7    |
| pMT85-tuf->flag-MCS            |             | E240-2  | NsiI+EcoRV    | Linker  |               | F_flag_Nsi    | R_flag_RV     |     |               |               | Linker      | E630-17   |
| pGEM-dam                       |             | pGEM-T  |               |         |               | F_dam_Acc65   | R_dam_Nsi     |     |               |               | AT cloning  | E897-1    |
| pGEM-dam*                      |             | E897-1  |               |         |               | F_dam_Nsi*    | R_dam_Nsi*    |     |               |               | Mutagenesis | E907-19   |
| pMT85-tuf->dam-flag            | p665-dam    | E630-17 | Acc65+NsiI    | E907-19 | Acc65+NsiI    |               |               |     |               |               | Restriction | E908-1    |
| pMT85-p674->dam-flag           | p674-dam    | E908-1  | NotI+Acc65    | Linker  |               | F_ldhp1_Not   | R_ldhp1_Acc65 |     |               |               | Linker      | E909-1    |
| pMT85-p036->dam-flag           | p036-dam    | E908-1  | NotI+Acc65    | E386-5  | NotI+Acc65    |               |               |     |               |               | Restriction | E910-4    |
| pMT85-p517->dam-flag           | p5175-dam   | E908-1  | NotI+Acc65    | Linker  |               | F_p517_Not    | R_p517_Acc    |     |               |               | Linker      | E911-6    |
| pMT85-4GATC-Prom->Dam          |             | R70-3#  | NotI + EcoNI  | Linker  |               | F_pMT_4GATC   | R_pMT_4GATC   | PCR | F_prom_Dam    | R_Dam_pMT     | Gibson      | Libraries |
| pMT85-4GATC-Syp32->UTR25-Dam   |             | R70-3#  | NotI + EcoNI  | Linker  |               | F_pMT_Syp32   | R_Syp32_Dam   | PCR | F_Dam         | R_Dam_pMT     | Gibson      | Libraries |
| pMT85-4GATC-Ilmp200->UTR25-Dam |             | R70-3#  | NotI + EcoNI  | Linker  |               | F_pMT_Ilmp200 | R_Ilmp200_Dam | PCR | F_Dam         | R_Dam_pMT     | Gibson      | Libraries |
| pMT85-Syp32->dam-flag          | SyP32-dam   | E908-1  | NotI+Acc65    | Linker  |               | F_SyP32       | R_Syp32_Dam   |     |               |               | Linker      | E1031-7   |
| pMT85-Ilmp200->dam-flag        | Ilmp200-dam | E908-1  | NotI+Acc65    | Linker  |               | F_LLmp200     | R_LLmp200     |     |               |               | Linker      | E1032-10  |
| pMT85-4GATC-p1->dam            | p1-dam      | R70-3#  | NotI + EcoNI  | Linker  |               | F_pMT_4GATC   | R_pMT_4GATC   | PCR | F_p1_dam      | R_Dam_pMT     | Gibson      | E1107-7   |
| pMT85-4GATC-p2->dam            | p2-dam      | R70-3#  | NotI + EcoNI  | Linker  |               | F_pMT_4GATC   | R_pMT_4GATC   | PCR | F_p2_dam      | R_Dam_pMT     | Gibson      | E1108-10  |
| pMT85-4GATC-p3->dam            | p3-dam      | R70-3#  | NotI + EcoNI  | Linker  |               | F_pMT_4GATC   | R_pMT_4GATC   | PCR | F_p3_dam      | R_Dam_pMT     | Gibson      | E1109-13  |
| pMT85-4GATC-p4->dam            | p4-dam      | R70-3#  | NotI + EcoNI  | Linker  |               | F_pMT_4GATC   | R_pMT_4GATC   | PCR | F_p4_dam      | R_Dam_pMT     | Gibson      | E1110-16  |
| pMT85-4GATC-p5->dam            | p5-dam      | R70-3#  | NotI + EcoNI  | Linker  |               | F_pMT_4GATC   | R_pMT_4GATC   | PCR | F_p5_dam      | R_Dam_pMT     | Gibson      | E1111-19  |
| pMT85-4GATC-p6->dam            | p6-dam      | R70-3#  | NotI + EcoNI  | Linker  |               | F_pMT_4GATC   | R_pMT_4GATC   | PCR | F_p6_dam      | R_Dam_pMT     | Gibson      | E1112-23  |

|                           |                  |        |              |        |  |             |             |     |           |                |        |           |
|---------------------------|------------------|--------|--------------|--------|--|-------------|-------------|-----|-----------|----------------|--------|-----------|
| pMT85-4GATC-p7->dam       | p7-dam           | R70-3# | NotI + EcoNI | Linker |  | F_pMT_4GATC | R_pMT_4GATC | PCR | F_p7_dam  | R_Dam_pMT      | Gibson | E1113-10  |
| pMT85-4GATC-p8->dam       | p8-dam           | R70-3# | NotI + EcoNI | Linker |  | F_pMT_4GATC | R_pMT_4GATC | PCR | F_p8_dam  | R_Dam_pMT      | Gibson | E1114-13  |
| pMT85-4GATC-p9->dam       | p9-dam           | R70-3# | NotI + EcoNI | Linker |  | F_pMT_4GATC | R_pMT_4GATC | PCR | F_p9_dam  | R_Dam_pMT      | Gibson | E1115'-23 |
| pMT85-4GATC-p10->dam      | p10-dam          | R70-3# | NotI + EcoNI | Linker |  | F_pMT_4GATC | R_pMT_4GATC | PCR | F_p10_dam | R_Dam_pMT      | Gibson | E1116-20  |
| pMT85-4GATC-p11->dam      | p11-dam          | R70-3# | NotI + EcoNI | Linker |  | F_pMT_4GATC | R_pMT_4GATC | PCR | F_p11_dam | R_Dam_pMT      | Gibson | E1117-22  |
| pMT85-4GATC-p12->dam      | p12-dam          | R70-3# | NotI + EcoNI | Linker |  | F_pMT_4GATC | R_pMT_4GATC | PCR | F_p12_dam | R_Dam_pMT      | Gibson | E1118-25  |
| pMT85-4GATC-Syp32->u1-dam | UTR1-dam         | R70-3# | NotI + EcoNI | Linker |  | F_pMT_Syp32 | R_u1_dam    | PCR | F_dam     | R_Dam_pMT      | Gibson | E1151-7   |
| pMT85-4GATC-Syp32->u2-dam | UTR2-dam         | R70-3# | NotI + EcoNI | Linker |  | F_pMT_Syp32 | R_u2_dam    | PCR | F_dam     | R_Dam_pMT      | Gibson | E1152-10  |
| pMT85-4GATC-Syp32->u3-dam | UTR3-dam         | R70-3# | NotI + EcoNI | Linker |  | F_pMT_Syp32 | R_u3_dam    | PCR | F_dam     | R_Dam_pMT      | Gibson | E1153-15  |
| pMT85-4GATC-Syp32->u4-dam | UTR4-dam         | R70-3# | NotI + EcoNI | Linker |  | F_pMT_Syp32 | R_u4_dam    | PCR | F_dam     | R_Dam_pMT      | Gibson | E1154-16  |
| pMT85-4GATC-Syp32->u5-dam | UTR5-dam         | R70-3# | NotI + EcoNI | Linker |  | F_pMT_Syp32 | R_u5_dam    | PCR | F_dam     | R_Dam_pMT      | Gibson | E1155-19  |
| pMT85-4GATC-Syp32->u6-dam | UTR6-dam         | R70-3# | NotI + EcoNI | Linker |  | F_pMT_Syp32 | R_u6_dam    | PCR | F_dam     | R_Dam_pMT      | Gibson | E1156-22  |
| pMT85-4GATC-Syp32->u7-dam | UTR7-dam         | R70-3# | NotI + EcoNI | Linker |  | F_pMT_Syp32 | R_u7_dam    | PCR | F_dam     | R_Dam_pMT      | Gibson | E1157-22  |
| pMT85-4GATC-Syp32->u8-dam | UTR8-dam         | R70-3# | NotI + EcoNI | Linker |  | F_pMT_Syp32 | R_u8_dam    | PCR | F_dam     | R_Dam_pMT      | Gibson | E1158-23  |
| pMT85-SyP32->u1A-dam-flag | SyP32-UTR1-A-dam | R70-3# |              | Linker |  | F_pMT_Syp32 | R_U1_A_dam  | PCR | F_dam     | R_dam_Nsi_Flag | Gibson | A17-1     |
| pMT85-SyP32->u1C-dam-flag | SyP32-UTR1-C-dam | R70-3# |              | Linker |  | F_pMT_Syp32 | R_U1_C_dam  | PCR | F_dam     | R_dam_Nsi_Flag | Gibson | A15-3     |
| pMT85-SyP32->u1G-dam-flag | SyP32-UTR1-G-dam | R70-3# |              | Linker |  | F_pMT_Syp32 | R_U1_G_dam  | PCR | F_dam     | R_dam_Nsi_Flag | Gibson | A14-6     |
| pMT85-SyP32->u1T-dam-flag | SyP32-UTR1-T-dam | R70-3# |              | Linker |  | F_pMT_Syp32 | R_U1_T_dam  | PCR | F_dam     | R_dam_Nsi_Flag | Gibson | A16-1     |
| pMT85-SyP32->u2A-dam-flag | SyP32-UTR2-A-dam | R70-3# |              | Linker |  | F_pMT_Syp32 | R_U2_A      | PCR | F_dam     | R_dam_Nsi_Flag | Gibson | A26-3     |
| pMT85-SyP32->u2C-dam-flag | SyP32-UTR2-C-dam | R70-3# |              | Linker |  | F_pMT_Syp32 | R_U2_C      | PCR | F_dam     | R_dam_Nsi_Flag | Gibson | A27-1     |
| pMT85-SyP32->u2G-dam-flag | SyP32-UTR2-G-dam | R70-3# |              | Linker |  | F_pMT_Syp32 | R_U2_G      | PCR | F_dam     | R_dam_Nsi_Flag | Gibson | A28-1     |
| pMT85-SyP32->u2T-dam-flag | SyP32-UTR2-T-dam | R70-3# |              | Linker |  | F_pMT_Syp32 | R_U2_T      | PCR | F_dam     | R_dam_Nsi_Flag | Gibson | A29-1     |
| pMT85-SyP32->u7A-dam-flag | SyP32-UTR7-A-dam | R70-3# |              | Linker |  | F_pMT_Syp32 | R_U7_A      | PCR | F_dam     | R_dam_Nsi_Flag | Gibson | A22-1     |
| pMT85-SyP32->u7C-dam-flag | SyP32-UTR7-C-dam | R70-3# |              | Linker |  | F_pMT_Syp32 | R_U7_C      | PCR | F_dam     | R_dam_Nsi_Flag | Gibson | A23-1     |
| pMT85-SyP32->u7G-dam-flag | SyP32-UTR7-G-dam | R70-3# |              | Linker |  | F_pMT_Syp32 | R_U7_G      | PCR | F_dam     | R_dam_Nsi_Flag | Gibson | A24-1     |
| pMT85-SyP32->u7T-dam-flag | SyP32-UTR7-T-dam | R70-3# |              | Linker |  | F_pMT_Syp32 | R_U7_T      | PCR | F_dam     | R_dam_Nsi_Flag | Gibson | A25-3     |
| pMT85-SyP32->u8A-dam-flag | SyP32-UTR8-A-dam | R70-3# |              | Linker |  | F_pMT_Syp32 | R_U8_A_dam  | PCR | F_dam     | R_dam_Nsi_Flag | Gibson | A18-3     |
| pMT85-SyP32->u8C-dam-flag | SyP32-UTR8-C-dam | R70-3# |              | Linker |  | F_pMT_Syp32 | R_U8_C_dam  | PCR | F_dam     | R_dam_Nsi_Flag | Gibson | A21-3     |
| pMT85-SyP32->u8G-dam-flag | SyP32-UTR8-G-dam | R70-3# |              | Linker |  | F_pMT_Syp32 | R_U8_G_dam  | PCR | F_dam     | R_dam_Nsi_Flag | Gibson | A20-1     |
| pMT85-SyP32->u8T-dam-flag | SyP32-UTR8-T-dam | R70-3# |              | Linker |  | F_pMT_Syp32 | R_U8_T_dam  | PCR | F_dam     | R_dam_Nsi_Flag | Gibson | A19-2     |

|                               |                 |        |  |        |  |               |              |     |       |                |        |        |
|-------------------------------|-----------------|--------|--|--------|--|---------------|--------------|-----|-------|----------------|--------|--------|
| pMT85-SyP32->ATG-dam-flag     | SyP32-ATG-dam   | R70-3# |  | Linker |  | F_pMT_Syp32   | R_Syp32_NTG  | PCR | F_dam | R_dam_Nsi_Flag | Gibson | A43-1  |
| pMT85-SyP32->CTG-dam-flag     | SyP32-CTG-dam   | R70-3# |  | Linker |  | F_pMT_Syp32   | R_Syp32_NTG  | PCR | F_dam | R_dam_Nsi_Flag | Gibson | A43-2  |
| pMT85-SyP32->GTG-dam-flag     | SyP32-GTG-dam   | R70-3# |  | Linker |  | F_pMT_Syp32   | R_Syp32_NTG  | PCR | F_dam | R_dam_Nsi_Flag | Gibson | A43-4  |
| pMT85-SyP32->TTG-dam-flag     | SyP32-TTG-dam   | R70-3# |  | Linker |  | F_pMT_Syp32   | R_Syp32_NTG  | PCR | F_dam | R_dam_Nsi_Flag | Gibson | A43-6  |
| pMT85-llmp200->ATG-dam-flag   | llmp200-ATG-dam | R70-3# |  | Linker |  | F_pMT_llmp200 | R_mp200_NATG | PCR | F_dam | R_dam_Nsi_Flag | Gibson | A45-5  |
| pMT85-llmp200->CTG-dam-flag   | llmp200-CTG-dam | R70-3# |  | Linker |  | F_pMT_llmp200 | R_mp200_NATG | PCR | F_dam | R_dam_Nsi_Flag | Gibson | A45-1  |
| pMT85-llmp200->GTG-dam-flag   | llmp200-GTG-dam | R70-3# |  | Linker |  | F_pMT_llmp200 | R_mp200_NATG | PCR | F_dam | R_dam_Nsi_Flag | Gibson | A45G-4 |
| pMT85-llmp200->TTG-dam-flag   | llmp200-TTG-dam | R70-3# |  | Linker |  | F_pMT_llmp200 | R_mp200_NATG | PCR | F_dam | R_dam_Nsi_Flag | Gibson | A45T-8 |
| pMT85-SyP32->ATC-ATG-dam-flag | ATC-ATG-dam     | R70-3# |  | Linker |  | F_pMT_Syp32   | R_LL_NTG     | PCR | F_dam | R_dam_Nsi_Flag | Gibson | A37-3  |
| pMT85-SyP32->ATC-CTG-dam-flag | ATC-CTG-dam     | R70-3# |  | Linker |  | F_pMT_Syp32   | R_LL_NTG     | PCR | F_dam | R_dam_Nsi_Flag | Gibson | A40-2  |
| pMT85-SyP32->ATC-GTG-dam-flag | ATC-GTG-dam     | R70-3# |  | Linker |  | F_pMT_Syp32   | R_LL_NTG     | PCR | F_dam | R_dam_Nsi_Flag | Gibson | A37'-1 |
| pMT85-SyP32->ATC-TTG-dam-flag | ATC-TTG-dam     | R70-3# |  | Linker |  | F_pMT_Syp32   | R_LL_NTG     | PCR | F_dam | R_dam_Nsi_Flag | Gibson | A37-1  |



## Supplementary Table 2. Tested promoters and 5'-UTRs

Sequences upstream of the Dam ATG are depicted, of known promoters and the promoters and 5'-UTRs selected from the libraries for validation.

### Proof of principle

|      |                                                                                                                                                                                                                     |
|------|---------------------------------------------------------------------------------------------------------------------------------------------------------------------------------------------------------------------|
| p517 | GGCCGCAAAAATTAATTAAGTTTTCTCCGCTTTAATTAACA<br>ATTTTCTTTTATATAAATAGGATCAAAGATAAAAAAG                                                                                                                                  |
| p674 | GGCCGCCTACTCCAAGAATTATAAGCCTCTCTACAGCTTTAT<br>CTCAAACCTTATGTAAAATTAGAGACGTAATTCAAACACG                                                                                                                              |
| p036 | TCACTTTCAGCAGTTAAAGTTCAGGTGTAAAGTTAACGATTA<br>AGATCAAAAACCGTTCCTAAAAAAGATCTTTTTCTAAAATCT<br>AAGCGAGTTACAACCTCAATTTAAATTTTCTCTCTGGTTGGTT<br>CGCCAACAGTTTTAGCCACTTCAACATTCGTCAAACACCATT<br>AA                         |
| p665 | TCAGCAATTACAAAACAAAACAAATAAAAAATAAGGGAATT<br>ACCCCAAGAAGACCTTTTGTGCTAACGCCAGTTTGGCAA<br>TCAAGTTCTGATTTTGCAATTATTTGCTCCATATGAATTACA<br>CTACTCCAAGAATTATAAGCCTCTCTACAGCTTTATCTCAA<br>CTTATGTAAAATTAGAGACGTAATTCAAACAC |

### Promoters

|     |                                        |
|-----|----------------------------------------|
| p1  | ACCCATTGAAGTGGTCGTAAGTATAAATTCTGATT    |
| p2  | ATAATCATCAATGATAAAGCTTTCGTATAATTTATATT |
| p3  | CTCAACACGAGATTTCTTAGAAGTGTATAATATCAATA |
| p4  | GTAATTC AACATGCTTGCCTGCGTTATAATATAGTTT |
| p5  | TAGGGTCGGTAACCCACTCGCCTCCTATAATCAGTGCA |
| p6  | TTGACCCGATCCATCGCGGTAATTTTATAATCGGACAT |
| p7  | AAAGAGGTGCGTGTCTATACTATTATATAATCTTATCT |
| p8  | CTTTCATATCGCATTAGCATTATATTATAATGAAATTA |
| p9  | GTTGAACTATAGCGTCTCGTTACAGTATAATAATCTAA |
| p10 | TAGCACCTACAATTTAAAGAGTATATATAATTCATATT |
| p11 | TCTTTAAGGTTTTGTATTGGTCATTTATAATCCTCATC |
| p12 | CGCTGTAAGCTAAATTCAGGGGCCTATAATTCATGG   |

### 5'-UTRs

|      |                            |
|------|----------------------------|
| UTR1 | ATAAGAGTGCCTGGATCCAGACAAT  |
| UTR2 | ATAGAATTGGGTAAGTAAACTTATC  |
| UTR3 | CAACACTGAAGTTTAAAGTTGAAACC |
| UTR4 | AGGAGAGATTTTCCAAAGTCCATAT  |
| UTR5 | TTAGATATTCGTCTAAGGAGGGATT  |
| UTR6 | CGATATTACGTGCTACTTCGACCAG  |
| UTR7 | CGCTATTTATTTGACCGCAAGTGTG  |
| UTR8 | TCGTTCCACAAATCTACCTGCTTCA  |

**Supplementary Table 3. Dam activity and corresponding Dam copy number of known promoters**

\* qPCR using oligos that amplify GATC from the genomic 19,580 position. # Estimated from linear regression interpolation using the DNA methylation level. Dam protein copy number / cell was estimated from LC-MSMS (see Methods). In the case of Venus, Western blot cannot be compared. NA: does not apply; ND: not determined. Stdev is the Standard deviation (n=3 in qPCR, n=2 in LC-MSMS).

| Promoter                      | Dam activity (qPCR)* |        | Dam abundance        |                              |                        |
|-------------------------------|----------------------|--------|----------------------|------------------------------|------------------------|
|                               | Average              | Stdev  | Copy number per cell | Copy number per cell (Stdev) | Western blot intensity |
| p674-Venus (negative control) | 0.010                | 0.0009 | 1.2#                 | 0.02                         | NA                     |
| p517                          | 0.41                 | 0.41   | 11.14                | 10.29                        | 518.22                 |
| p674                          | 0.33                 | 0.14   | 9.25                 | 3.60                         | 621.71                 |
| p036                          | 0.57                 | 0.30   | 15.24                | 7.47                         | 2348.49                |
| p665                          | 19.11                | 7.52   | 479.86               | 188.55                       | 9669.73                |
| Syp32 (strong promoter)       | 3.68                 | 5.17   | 93.2#                | 129.65                       | ND                     |
| ll_mp200 (weak promoter)      | 0.60                 | 0.26   | 16.08#               | 6.57                         | ND                     |

## Supplementary Table 4. Correlation between two biological replicas in the transcription and translation screens

Different read count cutoffs (minimal number of reads in one of the two digestions) were applied to find a cutoff (highlighted), which is a compromise (maximise the number of unique sequences and the correlation between the two replicates). The number of filtered reads for each cutoff is indicated. The corresponding unique sequences were determined and the overlap between the 2 replicas and correlation of their DAMRatio was computed. See also Supplementary Figure 2.

### Promoter library

| Read count cutoff | Experiment 1        |                     |                  | Experiment 2        |                     |                  | Comparison |          |           |            |
|-------------------|---------------------|---------------------|------------------|---------------------|---------------------|------------------|------------|----------|-----------|------------|
|                   | Filtered Dpnl reads | Filtered Mbol reads | Unique sequences | Filtered Dpnl reads | Filtered Mbol reads | Unique sequences | Overlap    | Combined | Pearson r | Spearman r |
| 0                 | 12724070            | 12207185            | 2042191          | 15094952            | 13026648            | 1815938          | 325330     | 3532799  | 0.741     | 0.697      |
| 10                | 11778451            | 11304930            | 230930           | 14224747            | 12366358            | 197513           | 146582     | 281861   | 0.869     | 0.779      |
| 20                | 11249899            | 10824763            | 171309           | 13831620            | 12068909            | 155373           | 103047     | 223635   | 0.900     | 0.807      |
| 30                | 10692050            | 10334420            | 136257           | 13399767            | 11750024            | 129575           | 78863      | 186969   | 0.916     | 0.822      |
| 40                | 10151101            | 9862285             | 112617           | 12951604            | 11424468            | 111020           | 62961      | 160676   | 0.926     | 0.831      |
| 50                | 9633275             | 9406874             | 95108            | 12503919            | 11099220            | 96741            | 51474      | 140375   | 0.933     | 0.838      |
| 60                | 9143314             | 8981494             | 81744            | 12068350            | 10785510            | 85489            | 42899      | 124334   | 0.939     | 0.844      |
| 70                | 8684189             | 8587479             | 71247            | 11648166            | 10480444            | 76340            | 36384      | 111203   | 0.943     | 0.848      |
| 80                | 8258852             | 8216362             | 62728            | 11235969            | 10182271            | 68562            | 31162      | 100128   | 0.947     | 0.852      |
| 90                | 7865006             | 7865329             | 55746            | 10851231            | 9901233             | 62127            | 27128      | 90745    | 0.950     | 0.856      |
| 100               | 7480801             | 7529615             | 49706            | 10480828            | 9632425             | 56599            | 23666      | 82639    | 0.953     | 0.860      |
| 110               | 7129501             | 7216535             | 44650            | 10129045            | 9372132             | 51807            | 20863      | 75594    | 0.955     | 0.862      |
| 120               | 6794114             | 6930270             | 40336            | 9790760             | 9122177             | 47625            | 18451      | 69510    | 0.957     | 0.866      |
| 130               | 6481865             | 6654402             | 36570            | 9459683             | 8884036             | 43905            | 16448      | 64027    | 0.959     | 0.869      |
| 140               | 6198276             | 6395194             | 33369            | 9154983             | 8652495             | 40643            | 14710      | 59302    | 0.960     | 0.870      |
| 150               | 5926120             | 6159868             | 30568            | 8861348             | 8436842             | 37773            | 13267      | 55074    | 0.961     | 0.871      |

|      |         |         |       |         |         |       |       |       |       |       |
|------|---------|---------|-------|---------|---------|-------|-------|-------|-------|-------|
| 160  | 5666603 | 5921756 | 28004 | 8576404 | 8229177 | 35163 | 11979 | 51188 | 0.962 | 0.873 |
| 170  | 5440445 | 5707603 | 25864 | 8310125 | 8031184 | 32854 | 10812 | 47906 | 0.964 | 0.876 |
| 180  | 5213640 | 5497533 | 23873 | 8047270 | 7831554 | 30683 | 9803  | 44753 | 0.965 | 0.880 |
| 190  | 4996040 | 5296303 | 22060 | 7795391 | 7655584 | 28785 | 8933  | 41912 | 0.966 | 0.883 |
| 200  | 4797877 | 5111891 | 20489 | 7556551 | 7474994 | 27014 | 8192  | 39311 | 0.967 | 0.885 |
| 300  | 3261917 | 3663381 | 10597 | 5698651 | 6011028 | 15752 | 3788  | 22561 | 0.973 | 0.899 |
| 400  | 2321529 | 2732745 | 6209  | 4415370 | 4953042 | 10107 | 2075  | 14241 | 0.978 | 0.902 |
| 500  | 1703209 | 2110624 | 3939  | 3521193 | 4191960 | 7009  | 1274  | 9674  | 0.980 | 0.915 |
| 600  | 1273293 | 1666291 | 2636  | 2883943 | 3597731 | 5104  | 817   | 6923  | 0.983 | 0.919 |
| 700  | 978608  | 1349324 | 1859  | 2355936 | 3119712 | 3794  | 553   | 5100  | 0.984 | 0.921 |
| 800  | 756633  | 1102551 | 1341  | 1961356 | 2737551 | 2916  | 392   | 3865  | 0.984 | 0.926 |
| 900  | 596219  | 886870  | 970   | 1650629 | 2429350 | 2298  | 268   | 3000  | 0.985 | 0.949 |
| 1000 | 463623  | 731809  | 715   | 1433309 | 2167365 | 1866  | 200   | 2381  | 0.985 | 0.951 |

### 5'-UTR library with strong promoter

| Read count cutoff | Experiment 1        |                     |                  | Experiment 2        |                     |                  | Comparison |          |           |            |
|-------------------|---------------------|---------------------|------------------|---------------------|---------------------|------------------|------------|----------|-----------|------------|
|                   | Filtered Dpnl reads | Filtered Mbol reads | Unique sequences | Filtered Dpnl reads | Filtered Mbol reads | Unique sequences | Overlap    | Combined | Pearson r | Spearman r |
| 0                 | 16620627            | 13616606            | 2925359          | 8568411             | 19027119            | 2054085          | 434517     | 4544927  | 0.718     | 0.729      |
| 10                | 14908604            | 11850781            | 401155           | 8017650             | 17705195            | 289539           | 141022     | 549672   | 0.882     | 0.871      |
| 20                | 13846497            | 10605555            | 252014           | 7619909             | 16961261            | 206631           | 85361      | 373284   | 0.909     | 0.896      |
| 30                | 12913566            | 9602381             | 181670           | 7234755             | 16256432            | 162174           | 59529      | 284315   | 0.922     | 0.908      |
| 40                | 12097603            | 8782223             | 140089           | 6874740             | 15592403            | 133071           | 44779      | 228381   | 0.931     | 0.915      |
| 50                | 11376578            | 8093893             | 112512           | 6529186             | 14963310            | 111715           | 34985      | 189242   | 0.938     | 0.920      |
| 60                | 10733482            | 7510828             | 92940            | 6207070             | 14375294            | 95518            | 28219      | 160239   | 0.943     | 0.924      |
| 70                | 10171210            | 7005293             | 78594            | 5912550             | 13825851            | 82862            | 23263      | 138193   | 0.947     | 0.927      |
| 80                | 9668858             | 6564590             | 67607            | 5645984             | 13309025            | 72735            | 19603      | 120739   | 0.951     | 0.930      |

|      |         |         |       |         |          |       |       |        |       |       |
|------|---------|---------|-------|---------|----------|-------|-------|--------|-------|-------|
| 90   | 9212140 | 6168757 | 58872 | 5398926 | 12837521 | 64528 | 16858 | 106542 | 0.954 | 0.932 |
| 100  | 8787157 | 5815458 | 51746 | 5166061 | 12408647 | 57782 | 14582 | 94946  | 0.957 | 0.934 |
| 110  | 8398188 | 5496473 | 45869 | 4951144 | 11992537 | 51971 | 12816 | 85024  | 0.959 | 0.936 |
| 120  | 8049962 | 5215959 | 41114 | 4756722 | 11617798 | 47213 | 11291 | 77036  | 0.961 | 0.938 |
| 130  | 7727352 | 4956141 | 37056 | 4573559 | 11258920 | 43048 | 10068 | 70036  | 0.962 | 0.939 |
| 140  | 7413977 | 4711126 | 33453 | 4405130 | 10922402 | 39444 | 9071  | 63826  | 0.964 | 0.941 |
| 150  | 7137699 | 4490608 | 30480 | 4243633 | 10606061 | 36283 | 8172  | 58591  | 0.965 | 0.943 |
| 160  | 6877981 | 4287868 | 27884 | 4094745 | 10308097 | 33515 | 7406  | 53993  | 0.966 | 0.944 |
| 170  | 6630998 | 4099795 | 25582 | 3956270 | 10032414 | 31103 | 6775  | 49910  | 0.967 | 0.945 |
| 180  | 6396955 | 3922632 | 23536 | 3826340 | 9776679  | 28992 | 6219  | 46309  | 0.968 | 0.946 |
| 190  | 6184783 | 3758747 | 21775 | 3707848 | 9514012  | 27022 | 5723  | 43074  | 0.969 | 0.948 |
| 200  | 5973647 | 3606444 | 20149 | 3593305 | 9272348  | 25283 | 5273  | 40159  | 0.970 | 0.948 |
| 300  | 4439082 | 2509081 | 10670 | 2700449 | 7380248  | 14348 | 2723  | 22295  | 0.974 | 0.954 |
| 400  | 3446911 | 1852590 | 6482  | 2150029 | 6102220  | 9288  | 1561  | 14209  | 0.980 | 0.957 |
| 500  | 2731938 | 1422287 | 4229  | 1744381 | 5178878  | 6445  | 987   | 9687   | 0.981 | 0.961 |
| 600  | 2244079 | 1111559 | 2947  | 1447557 | 4454398  | 4666  | 676   | 6937   | 0.981 | 0.960 |
| 700  | 1876923 | 886641  | 2146  | 1234400 | 3903811  | 3544  | 481   | 5209   | 0.984 | 0.966 |
| 800  | 1606884 | 723720  | 1635  | 1053790 | 3454387  | 2740  | 349   | 4026   | 0.984 | 0.966 |
| 900  | 1354354 | 573739  | 1218  | 931906  | 3097085  | 2206  | 264   | 3160   | 0.985 | 0.960 |
| 1000 | 1169641 | 472746  | 947   | 821906  | 2754951  | 1751  | 204   | 2494   | 0.985 | 0.956 |

### 5'-UTR library with weak promoter

| Read count cutoff | Experiment 1        |                     |                  | Experiment 2        |                     |                  | Comparison |          |           |            |
|-------------------|---------------------|---------------------|------------------|---------------------|---------------------|------------------|------------|----------|-----------|------------|
|                   | Filtered Dpnl reads | Filtered Mbol reads | Unique sequences | Filtered Dpnl reads | Filtered Mbol reads | Unique sequences | Overlap    | Combined | Pearson r | Spearman r |
| 0                 | 18412532            | 16217588            | 2961856          | 10737660            | 11729822            | 1474115          | 471982     | 3963989  | 0.458     | 0.410      |
| 10                | 16578951            | 14649482            | 353733           | 9830249             | 10840867            | 257918           | 187241     | 424410   | 0.670     | 0.617      |

|      |          |          |        |         |          |        |        |        |       |       |
|------|----------|----------|--------|---------|----------|--------|--------|--------|-------|-------|
| 20   | 15406303 | 13658832 | 238785 | 8997928 | 10062944 | 171484 | 114392 | 295877 | 0.761 | 0.694 |
| 30   | 14302147 | 12758190 | 179773 | 8194137 | 9323172  | 125503 | 78981  | 226295 | 0.809 | 0.737 |
| 40   | 13286823 | 11941401 | 142213 | 7481322 | 8656137  | 96901  | 58016  | 181098 | 0.838 | 0.764 |
| 50   | 12360592 | 11206038 | 116024 | 6857920 | 8074055  | 77714  | 44588  | 149150 | 0.859 | 0.785 |
| 60   | 11527051 | 10548857 | 96959  | 6297853 | 7549151  | 63703  | 35096  | 125566 | 0.873 | 0.801 |
| 70   | 10769301 | 9949475  | 82295  | 5807768 | 7082929  | 53304  | 28328  | 107271 | 0.883 | 0.815 |
| 80   | 10072809 | 9402742  | 70685  | 5379216 | 6671604  | 45405  | 23333  | 92757  | 0.892 | 0.829 |
| 90   | 9447735  | 8908829  | 61440  | 4993682 | 6297870  | 39081  | 19493  | 81028  | 0.901 | 0.841 |
| 100  | 8872448  | 8458923  | 53886  | 4655528 | 5968535  | 34121  | 16529  | 71478  | 0.906 | 0.851 |
| 110  | 8349858  | 8049773  | 47658  | 4346708 | 5655852  | 29914  | 14230  | 63342  | 0.912 | 0.860 |
| 120  | 7878888  | 7671495  | 42481  | 4064881 | 5371870  | 26437  | 12245  | 56673  | 0.916 | 0.868 |
| 130  | 7441467  | 7325514  | 38098  | 3815773 | 5115817  | 23577  | 10695  | 50980  | 0.921 | 0.874 |
| 140  | 7032131  | 6998669  | 34282  | 3581260 | 4874730  | 21070  | 9362   | 45990  | 0.926 | 0.879 |
| 150  | 6660823  | 6706815  | 31071  | 3375208 | 4655404  | 18984  | 8286   | 41769  | 0.930 | 0.882 |
| 160  | 6329378  | 6438692  | 28357  | 3189964 | 4456106  | 17207  | 7368   | 38196  | 0.931 | 0.885 |
| 170  | 6016156  | 6183898  | 25955  | 3018918 | 4269299  | 15658  | 6643   | 34970  | 0.934 | 0.890 |
| 180  | 5712436  | 5943526  | 23768  | 2862907 | 4096361  | 14308  | 5983   | 32093  | 0.937 | 0.896 |
| 190  | 5436624  | 5715876  | 21868  | 2714243 | 3933358  | 13106  | 5410   | 29564  | 0.939 | 0.897 |
| 200  | 5171049  | 5493073  | 20109  | 2570576 | 3781735  | 12024  | 4917   | 27216  | 0.941 | 0.901 |
| 300  | 3293093  | 3879122  | 9916   | 1631622 | 2656833  | 5875   | 2155   | 13636  | 0.958 | 0.927 |
| 400  | 2239449  | 2892947  | 5684   | 1150694 | 2019184  | 3482   | 1176   | 7990   | 0.965 | 0.936 |
| 500  | 1567348  | 2235887  | 3523   | 831714  | 1583555  | 2225   | 697    | 5051   | 0.966 | 0.935 |
| 600  | 1133579  | 1786522  | 2339   | 639112  | 1261829  | 1510   | 449    | 3400   | 0.970 | 0.944 |
| 700  | 849801   | 1466732  | 1650   | 495256  | 1046290  | 1088   | 295    | 2443   | 0.971 | 0.946 |
| 800  | 652739   | 1220563  | 1203   | 388828  | 872690   | 801    | 191    | 1813   | 0.971 | 0.953 |
| 900  | 506287   | 1026225  | 896    | 319263  | 757721   | 630    | 139    | 1387   | 0.975 | 0.953 |
| 1000 | 387479   | 879172   | 685    | 259604  | 638428   | 481    | 102    | 1064   | 0.972 | 0.958 |

### Supplementary Table 5. DAMRatio, protein copy number and mRNA level of individual clones

Validation of 12 promoters and eight 5'-UTRs randomly picked from the screenings. Dam Activity (qPCR with 4xGATC oligos), Dam quantification by Proteomics (a), and mRNA by RT-qPCR (b) are shown. "Screening data" are the values from the screenings. "Validation data" correspond to individual clones. Estimated copy number from DAMRatio is calculated from experiment 1. MPN001 is used for normalization in LC-MSMS, 16S in the Dam activity assay, and MPN517 is used for RT-qPCR (oligo set 1=qdam, oligo set 2=qdam2). NA= Does not apply. Stdev is the Standard deviation (n=3 for qPCR, n=24 for the copy number estimation).

#### a. Dam activity and protein copy number

| Promoter Set 1 | Screening data  |                 |          |                 |                 |          |                                     | Validation data        |                       |            |                      |                              |
|----------------|-----------------|-----------------|----------|-----------------|-----------------|----------|-------------------------------------|------------------------|-----------------------|------------|----------------------|------------------------------|
|                | Experiment 1    |                 |          | Experiment 2    |                 |          | Estimated copy number from DAMRatio | Dam activity           |                       | Proteomics |                      |                              |
|                | Dpnl read count | Mbol read count | DAMRatio | Dpnl read count | Mbol read count | DAMRatio |                                     | Mbol/Dpnl ratio (qPCR) | Mbol/Dpnl ratio Stdev | LC-MSMS    | Copy number per cell | Copy number per cell (Stdev) |
| p6             | 0               | 237             | 2.907    | 2               | 68              | 2.004    | 903.21                              | 7.74                   | 1.48                  | 0.619      | 757.70               | 40.75                        |
| p7             | 2               | 144             | 2.215    | 6               | 92              | 1.765    | 180.70                              | 10.78                  | 3.87                  | 0.225      | 173.13               | 6.19                         |
| p8             | 3               | 144             | 2.090    | 0               | 44              | 2.295    | 135.16                              | 32.12                  | 4.00                  | 0.219      | 150.43               | 5.28                         |
| p9             | 21              | 514             | 1.900    | 45              | 1105            | 2.023    | 86.92                               | 56.79                  | 14.01                 | 0.195      | 130.71               | 4.53                         |
| p10            | 15              | 212             | 1.655    | 32              | 211             | 1.450    | 49.17                               | 33.69                  | 12.05                 | 0.105      | 41.01                | 1.67                         |
| p11            | 63              | 121             | 0.811    | 6               | 128             | 1.907    | 6.91                                | 2.46                   | 0.62                  | 0.024      | 6.16                 | 0.43                         |
| p12            | 242             | 92              | 0.113    | 28              | 86              | 1.119    | 1.37                                | 0.01                   | 0.002                 | 0.000      | NA                   | NA                           |

| Promoter Set 2 | Experiment 1    |                 |          | Experiment 2    |                 |          | Estimated copy number from DAMRatio | Dam activity           |                       | Proteomics |                      |                              |
|----------------|-----------------|-----------------|----------|-----------------|-----------------|----------|-------------------------------------|------------------------|-----------------------|------------|----------------------|------------------------------|
|                | Dpnl read count | Mbol read count | DAMRatio | Dpnl read count | Mbol read count | DAMRatio |                                     | Mbol/Dpnl ratio (qPCR) | Mbol/Dpnl ratio Stdev | LC-MSMS    | Copy number per cell | Copy number per cell (Stdev) |
|                | p1              | 0               | 93       | 2.503           | 1               | 58       | 2.112                               | 1149.52                | 0.17                  | 0.00       | 1.118                | 2334.84                      |
| p2             | 2               | 91              | 2.017    | 1               | 38              | 1.932    | 279.50                              | 1.69                   | 1.96                  | 0.152      | 105.86               | 3.658                        |
| p3             | 44              | 96              | 0.864    | 57              | 126             | 0.982    | 9.79                                | 0.08                   | 0.02                  | 0.035      | 12.00                | 0.701                        |
| p4             | 92              | 37              | 0.142    | 30              | 70              | 1.002    | 1.20                                | 0.014                  | 0.0013                | 0.009      | 1.27                 | 0.126                        |
| p5             | 91              | 7               | -0.530   | 117             | 94              | 0.548    | 0.17                                | 0.007                  | 0.0019                | 0          | NA                   | NA                           |

| 5'-UTR Set | Experiment 1    |                 |          | Experiment 2    |                 |          | Estimated copy number from DAMRatio | Dam activity           |                       | Proteomics |                      |                              |
|------------|-----------------|-----------------|----------|-----------------|-----------------|----------|-------------------------------------|------------------------|-----------------------|------------|----------------------|------------------------------|
|            | Dpnl read count | Mbol read count | DAMRatio | Dpnl read count | Mbol read count | DAMRatio |                                     | Mbol/Dpnl ratio (qPCR) | Mbol/Dpnl ratio Stdev | LC-MSMS    | Copy number per cell | Copy number per cell (Stdev) |
|            | UTR1            | 0               | 149      | 3.350           | 17              | 255      | 1.893                               | 2521.74                | 41.015                | 10.62      | 0.542                | 658.294                      |
| UTR2       | 4               | 114             | 2.535    | 2               | 70              | 2.115    | 462.93                              | 18.324                 | 2.02                  | 0.682      | 935.668              | 53.72                        |
| UTR3       | 7               | 145             | 2.435    | 12              | 162             | 1.839    | 375.57                              | 18.368                 | 3.98                  | 0.640      | 784.816              | 42.68                        |
| UTR4       | 19              | 249             | 2.270    | 1               | 17              | 1.695    | 266.76                              | 32.944                 | 1.92                  | 1.033      | 1642.460             | 62.51                        |
| UTR5       | 87              | 684             | 2.065    | 26              | 320             | 1.816    | 173.85                              | 5.742                  | 0.74                  | 0.117      | 62.506               | 2.29                         |
| UTR6       | 152             | 247             | 1.383    | 55              | 119             | 1.072    | 42.09                               | 2.318                  | 0.86                  | 0.056      | 19.619               | 0.99                         |
| UTR7       | 138             | 17              | 0.286    | 18              | 102             | 1.475    | 4.29                                | 0.031                  | 0.01                  | 0.018      | 3.770                | 0.30                         |
| UTR8       | 364             | 23              | -0.009   | 11              | 251             | 2.063    | 2.32                                | 0.012                  | 0.00                  | 0          | NA                   | NA                           |

#### b. mRNA level

| Promoter set 1 | Validation data |       |               |       |
|----------------|-----------------|-------|---------------|-------|
|                | RT-qPCR dam     |       | RT-qPCR dam 2 |       |
|                | Average         | Stdev | Average       | Stdev |
| p6             | 4.963           | 0.65  | 23.482        | 2.30  |
| p7             | 2.198           | 0.46  | 14.673        | 2.60  |
| p8             | 1.960           | 0.10  | 10.497        | 0.65  |
| p9             | 2.937           | 1.25  | 12.645        | 2.09  |
| p10            | 1.016           | 0.08  | 7.144         | 0.85  |
| p11            | 0.846           | 0.12  | 6.526         | 0.51  |
| p12            | 0.227           | 0.03  | 2.887         | 1.05  |

| Promoter set 2 | qPCR dam |        | qPCR dam 2 |        |
|----------------|----------|--------|------------|--------|
|                | Average  | Stdev  | Average    | Stdev  |
|                | p1       | 11.679 | 5.27       | 41.903 |
| p2             | 3.556    | 0.31   | 15.192     | 0.94   |
| p3             | 1.065    | 0.24   | 5.739      | 0.24   |
| p4             | 0.616    | 0.19   | 3.437      | 0.16   |
| p5             | 0.202    | 0.04   | 2.109      | 0.18   |

| 5'-UTR set | qPCR dam |        | qPCR dam 2 |        |
|------------|----------|--------|------------|--------|
|            | Average  | Stdev  | Average    | Stdev  |
|            | UTR1     | 26.498 | 10.96      | 30.097 |
| UTR2       | 14.532   | 3.40   | 18.545     | 2.26   |
| UTR3       | 9.100    | 2.31   | 14.156     | 2.62   |
| UTR4       | 14.989   | 1.17   | 18.009     | 3.81   |
| UTR5       | 4.695    | 0.21   | 17.602     | 0.32   |
| UTR6       | 2.172    | 0.33   | 5.134      | 0.49   |
| UTR7       | 2.437    | 0.29   | 5.404      | 0.29   |
| UTR8       | 0.150    | 0.05   | 0.657      | 0.14   |

## Supplementary Table 6. Estimated Dam protein copy number per cell from LC-MSMS data

Dam protein copy number was estimated from a regression model using proteome-wide copy number data derived from LC-MSMS. We used 24 regression models from all Proteomics experiments and combined the averages. Stdev is the standard deviation (n=24). NA=not applicable.

|               | Constructs for proof of principle |             |              |               | Individual promoter constructs |               |              |             |    |               |               |               |               |              |             |     |
|---------------|-----------------------------------|-------------|--------------|---------------|--------------------------------|---------------|--------------|-------------|----|---------------|---------------|---------------|---------------|--------------|-------------|-----|
|               | p517                              | p674        | p036         | p665          | p1                             | p2            | p3           | p4          | p5 | p6            | p7            | p8            | p9            | p10          | p11         | p12 |
| Estimation 1  | 3.22                              | 4.27        | 26.46        | 454.17        | 2203.37                        | 100.42        | 11.40        | 1.21        | NA | 716.73        | 164.14        | 142.64        | 123.96        | 38.93        | 5.85        | NA  |
| Estimation 2  | 3.01                              | 4.01        | 25.78        | 468.33        | 2345.20                        | 100.47        | 10.92        | 1.10        | NA | 745.88        | 165.84        | 143.71        | 124.54        | 38.22        | 5.53        | NA  |
| Estimation 3  | 3.14                              | 4.18        | 26.81        | 484.08        | 2415.62                        | 104.19        | 11.38        | 1.16        | NA | 770.19        | 171.80        | 148.93        | 129.10        | 39.72        | 5.77        | NA  |
| Estimation 4  | 3.26                              | 4.35        | 27.92        | 506.07        | 2531.01                        | 108.69        | 11.83        | 1.20        | NA | 805.69        | 179.35        | 155.44        | 134.71        | 41.38        | 6.00        | NA  |
| Estimation 5  | 3.49                              | 4.62        | 28.34        | 478.30        | 2298.87                        | 106.70        | 12.27        | 1.32        | NA | 752.78        | 173.90        | 151.25        | 131.55        | 41.60        | 6.32        | NA  |
| Estimation 6  | 3.63                              | 4.78        | 28.43        | 457.00        | 2137.76                        | 104.63        | 12.49        | 1.39        | NA | 713.65        | 169.09        | 147.42        | 128.53        | 41.46        | 6.51        | NA  |
| Estimation 7  | 3.37                              | 4.45        | 27.07        | 450.97        | 2152.19                        | 101.29        | 11.76        | 1.27        | NA | 708.31        | 164.72        | 143.35        | 124.76        | 39.66        | 6.08        | NA  |
| Estimation 8  | 3.61                              | 4.76        | 28.89        | 478.48        | 2275.96                        | 107.81        | 12.57        | 1.37        | NA | 750.80        | 175.14        | 152.47        | 132.73        | 42.29        | 6.51        | NA  |
| Estimation 9  | 3.14                              | 4.18        | 27.09        | 497.79        | 2508.46                        | 106.15        | 11.43        | 1.15        | NA | 794.24        | 175.56        | 152.05        | 131.69        | 40.22        | 5.78        | NA  |
| Estimation 10 | 3.35                              | 4.42        | 27.08        | 455.72        | 2186.71                        | 101.83        | 11.73        | 1.26        | NA | 716.90        | 165.87        | 144.29        | 125.51        | 39.74        | 6.05        | NA  |
| Estimation 11 | 3.69                              | 4.86        | 28.83        | 461.83        | 2156.40                        | 105.92        | 12.67        | 1.42        | NA | 720.81        | 171.08        | 149.18        | 130.08        | 42.02        | 6.61        | NA  |
| Estimation 12 | 3.53                              | 4.67        | 28.74        | 486.91        | 2345.32                        | 108.40        | 12.43        | 1.33        | NA | 766.82        | 176.79        | 153.73        | 133.68        | 42.21        | 6.40        | NA  |
| Estimation 13 | 3.19                              | 4.23        | 26.46        | 460.84        | 2254.21                        | 101.10        | 11.35        | 1.19        | NA | 728.99        | 165.67        | 143.87        | 124.93        | 39.00        | 5.80        | NA  |
| Estimation 14 | 3.37                              | 4.46        | 27.41        | 464.59        | 2238.33                        | 103.41        | 11.85        | 1.27        | NA | 731.71        | 168.66        | 146.66        | 127.53        | 40.26        | 6.10        | NA  |
| Estimation 15 | 3.33                              | 4.40        | 26.87        | 449.39        | 2149.20                        | 100.73        | 11.66        | 1.26        | NA | 706.26        | 163.92        | 142.63        | 124.11        | 39.39        | 6.02        | NA  |
| Estimation 16 | 3.55                              | 4.69        | 28.61        | 479.09        | 2292.88                        | 107.32        | 12.41        | 1.34        | NA | 753.10        | 174.67        | 151.98        | 132.23        | 41.95        | 6.41        | NA  |
| Estimation 17 | 3.32                              | 4.41        | 27.78        | 488.49        | 2402.32                        | 106.62        | 11.88        | 1.23        | NA | 773.93        | 175.00        | 151.90        | 131.84        | 41.00        | 6.06        | NA  |
| Estimation 18 | 3.86                              | 5.09        | 30.39        | 492.04        | 2311.21                        | 112.21        | 13.32        | 1.48        | NA | 769.28        | 181.57        | 158.24        | 137.91        | 44.35        | 6.93        | NA  |
| Estimation 19 | 3.32                              | 4.40        | 27.62        | 482.72        | 2365.83                        | 105.70        | 11.83        | 1.23        | NA | 764.03        | 173.32        | 150.48        | 130.65        | 40.73        | 6.05        | NA  |
| Estimation 20 | 2.91                              | 3.92        | 27.15        | 553.00        | 2950.81                        | 111.64        | 11.11        | 1.03        | NA | 897.04        | 187.97        | 161.97        | 139.57        | 40.88        | 5.48        | NA  |
| Estimation 21 | 3.10                              | 4.13        | 26.86        | 496.12        | 2507.01                        | 105.51        | 11.32        | 1.13        | NA | 792.21        | 174.66        | 151.23        | 130.95        | 39.92        | 5.71        | NA  |
| Estimation 22 | 4.18                              | 5.48        | 31.47        | 479.87        | 2179.95                        | 112.99        | 14.04        | 1.63        | NA | 743.05        | 180.94        | 158.16        | 138.25        | 45.57        | 7.41        | NA  |
| Estimation 23 | 3.51                              | 4.65        | 28.95        | 500.10        | 2434.98                        | 110.20        | 12.45        | 1.31        | NA | 790.04        | 180.32        | 156.65        | 136.09        | 42.63        | 6.38        | NA  |
| Estimation 24 | 3.35                              | 4.44        | 27.89        | 487.93        | 2392.52                        | 106.79        | 11.94        | 1.24        | NA | 772.38        | 175.13        | 152.05        | 132.01        | 41.14        | 6.10        | NA  |
| Average       | <b>3.39</b>                       | <b>4.49</b> | <b>27.87</b> | <b>479.74</b> | <b>2334.84</b>                 | <b>105.86</b> | <b>12.00</b> | <b>1.27</b> | NA | <b>757.70</b> | <b>173.13</b> | <b>150.43</b> | <b>130.71</b> | <b>41.01</b> | <b>6.16</b> | NA  |
| Stdev         | 0.275                             | 0.340       | 1.266        | 22.344        | 174.155                        | 3.658         | 0.701        | 0.126       | NA | 40.753        | 6.188         | 5.278         | 4.533         | 1.666        | 0.432       | NA  |



| Individual 5'-UTR constructs with strong promoter |               |               |               |                |              |              |             |      |
|---------------------------------------------------|---------------|---------------|---------------|----------------|--------------|--------------|-------------|------|
|                                                   | UTR1          | UTR2          | UTR3          | UTR4           | UTR5         | UTR6         | UTR7        | UTR8 |
| Estimation 1                                      | 622.86        | 884.72        | 742.33        | 1551.22        | 59.32        | 18.63        | 3.58        | NA   |
| Estimation 2                                      | 646.37        | 924.59        | 773.06        | 1639.49        | 58.72        | 18.02        | 3.35        | NA   |
| Estimation 3                                      | 667.64        | 954.28        | 798.20        | 1690.03        | 60.97        | 18.76        | 3.50        | NA   |
| Estimation 4                                      | 698.28        | 998.57        | 835.03        | 1769.87        | 63.56        | 19.52        | 3.63        | NA   |
| Estimation 5                                      | 654.73        | 928.06        | 779.50        | 1621.81        | 63.23        | 19.99        | 3.88        | NA   |
| Estimation 6                                      | 622.19        | 876.64        | 738.54        | 1517.26        | 62.56        | 20.18        | 4.03        | NA   |
| Estimation 7                                      | 616.45        | 872.42        | 733.35        | 1520.73        | 60.16        | 19.12        | 3.74        | NA   |
| Estimation 8                                      | 653.62        | 924.34        | 777.28        | 1609.36        | 64.11        | 20.43        | 4.01        | NA   |
| Estimation 9                                      | 687.89        | 985.37        | 823.31        | 1751.17        | 61.91        | 18.91        | 3.49        | NA   |
| Estimation 10                                     | 623.61        | 883.63        | 742.32        | 1543.25        | 60.37        | 19.11        | 3.72        | NA   |
| Estimation 11                                     | 628.54        | 885.23        | 745.92        | 1531.12        | 63.37        | 20.47        | 4.09        | NA   |
| Estimation 12                                     | 666.81        | 945.64        | 794.08        | 1653.79        | 64.19        | 20.27        | 3.92        | NA   |
| Estimation 13                                     | 633.05        | 900.84        | 755.17        | 1584.11        | 59.56        | 18.59        | 3.54        | NA   |
| Estimation 14                                     | 636.27        | 902.37        | 757.73        | 1578.26        | 61.23        | 19.33        | 3.74        | NA   |
| Estimation 15                                     | 614.54        | 870.13        | 731.26        | 1517.89        | 59.79        | 18.98        | 3.70        | NA   |
| Estimation 16                                     | 655.25        | 927.92        | 779.76        | 1619.12        | 63.68        | 20.20        | 3.94        | NA   |
| Estimation 17                                     | 671.75        | 957.06        | 801.81        | 1686.17        | 62.69        | 19.50        | 3.69        | NA   |
| Estimation 18                                     | 670.45        | 945.51        | 796.19        | 1638.86        | 67.00        | 21.55        | 4.28        | NA   |
| Estimation 19                                     | 663.36        | 944.39        | 791.50        | 1661.83        | 62.23        | 19.40        | 3.69        | NA   |
| Estimation 20                                     | 772.98        | 1121.43       | 931.05        | 2033.94        | 63.89        | 18.71        | 3.26        | NA   |
| Estimation 21                                     | 685.97        | 983.22        | 821.25        | 1749.07        | 61.49        | 18.74        | 3.45        | NA   |
| Estimation 22                                     | 649.52        | 909.21        | 768.47        | 1557.31        | 68.22        | 22.48        | 4.63        | NA   |
| Estimation 23                                     | 686.34        | 975.68        | 818.32        | 1712.89        | 65.02        | 20.37        | 3.90        | NA   |
| Estimation 24                                     | 670.59        | 954.77        | 800.16        | 1680.39        | 62.86        | 19.59        | 3.72        | NA   |
| Average                                           | <b>658.29</b> | <b>935.67</b> | <b>784.82</b> | <b>1642.46</b> | <b>62.51</b> | <b>19.62</b> | <b>3.77</b> | NA   |
| Stdev                                             | 33.877        | 53.719        | 42.677        | 111.279        | 2.295        | 0.991        | 0.298       | NA   |

### Supplementary Table 7. Growth phenotype of individual clones

Growth curves were performed by measuring the pH indicator colour change (see Methods). "Late time slope" equals the maximum slope of the pH color change. "Early time slope " equals the maximum slope of the pH color change in the first 24 hours. Dam protein copy number per cell was estimated from LC-MSMS (see Supplementary Data 2 and Methods). NC: negative control.

|              | Late time slope | Early time slope | Dam copy number per cell | Description               |
|--------------|-----------------|------------------|--------------------------|---------------------------|
| Empty vector | 0.103           | 0.0018           | NA                       | NC                        |
| p665-Venus   | 0.103           | 0.0014           | NA                       | NC                        |
| p517         | 0.092           | 0.0010           | 3.39                     | Proof of principle        |
| p674         | 0.094           | 0.0011           | 4.49                     | Proof of principle        |
| p036         | 0.094           | 0.0013           | 27.87                    | Proof of principle        |
| p665         | 0.081           | 0.0011           | 479.74                   | Proof of principle        |
| p12          | 0.090           | 0.0009           | 1.37                     | Promoter validation set 1 |
| p11          | 0.084           | 0.0007           | 6.16                     | Promoter validation set 1 |
| p10          | 0.084           | 0.0030           | 41.01                    | Promoter validation set 1 |
| p9           | 0.082           | 0.0007           | 130.71                   | Promoter validation set 1 |
| p8           | 0.082           | 0.0009           | 150.43                   | Promoter validation set 1 |
| p7           | 0.082           | 0.0009           | 173.13                   | Promoter validation set 1 |
| p6           | 0.083           | 0.0007           | 757.70                   | Promoter validation set 1 |
| p5           | 0.096           | 0.0008           | 0.17                     | Promoter validation set 2 |
| p4           | 0.093           | 0.0009           | 1.27                     | Promoter validation set 2 |
| p3           | 0.095           | 0.0008           | 12.00                    | Promoter validation set 2 |
| p2           | 0.095           | 0.0010           | 105.86                   | Promoter validation set 2 |
| p1           | 0.077           | 0.0009           | 2334.84                  | Promoter validation set 2 |

## Supplementary Table 8. Odd-ratio cancels nucleotide biases

Odd ratio is the nucleotide frequency between high-productive and low-productive promoter sequences. This table is similar to the Odd ratio of promoters in Fig. 3, but sequences were randomized. As it is shown here (the table is pseudocoloured) we cannot observe the nucleotide bias from randomly selected sequences. Randomly selected sequences do not overlap with each other.

### a. Randomly selected high-productive promoters (n=35,417) and low-productive promoters (n=47,222)

|   | -37 | -36 | -35 | -34 | -33 | -32 | -31 | -30 | -29 | -28 | -27 | -26 | -25 | -24 | -23 | -22 | -21 | -20 | -19 | -18 | -17 | -16 | -15 | -14 | -13 | T | A | T | A | A | T | -6  | -5  | -4  | -3  | -2  | -1  | +1  |
|---|-----|-----|-----|-----|-----|-----|-----|-----|-----|-----|-----|-----|-----|-----|-----|-----|-----|-----|-----|-----|-----|-----|-----|-----|-----|---|---|---|---|---|---|-----|-----|-----|-----|-----|-----|-----|
| A | 0.0 | 0.0 | 0.0 | 0.0 | 0.0 | 0.0 | 0.0 | 0.0 | 0.0 | 0.0 | 0.0 | 0.0 | 0.0 | 0.0 | 0.0 | 0.0 | 0.0 | 0.0 | 0.0 | 0.0 | 0.0 | 0.0 | 0.0 | 0.0 | 0.0 |   |   |   |   |   |   | 0.0 | 0.0 | 0.0 | 0.0 | 0.0 | 0.0 | 0.0 |
| C | 0.0 | 0.0 | 0.0 | 0.0 | 0.0 | 0.0 | 0.0 | 0.0 | 0.0 | 0.0 | 0.0 | 0.0 | 0.0 | 0.0 | 0.0 | 0.0 | 0.0 | 0.0 | 0.0 | 0.0 | 0.0 | 0.0 | 0.0 | 0.0 | 0.0 |   |   |   |   |   |   | 0.0 | 0.1 | 0.0 | 0.0 | 0.0 | 0.0 | 0.0 |
| G | 0.0 | 0.0 | 0.0 | 0.0 | 0.0 | 0.0 | 0.0 | 0.0 | 0.0 | 0.0 | 0.0 | 0.0 | 0.0 | 0.0 | 0.0 | 0.0 | 0.0 | 0.0 | 0.0 | 0.0 | 0.0 | 0.0 | 0.0 | 0.0 | 0.0 |   |   |   |   |   |   | 0.0 | 0.0 | 0.0 | 0.0 | 0.0 | 0.0 | 0.0 |
| T | 0.0 | 0.0 | 0.0 | 0.0 | 0.0 | 0.0 | 0.0 | 0.0 | 0.0 | 0.0 | 0.0 | 0.0 | 0.0 | 0.0 | 0.0 | 0.0 | 0.0 | 0.0 | 0.0 | 0.0 | 0.0 | 0.0 | 0.0 | 0.0 | 0.0 |   |   |   |   |   |   | 0.0 | 0.0 | 0.0 | 0.0 | 0.0 | 0.0 | 0.0 |

### b. Randomly selected high-productive 5'-UTRs (n=55,329) and low-productive 5'-UTRs (n=39,616)

|   | -25 | -24 | -23 | -22 | -21 | -20 | -19 | -18 | -17 | -16 | -15 | -14 | -13 | -12 | -11 | -10 | -9  | -8  | -7  | -6  | -5  | -4  | -3  | -2  | -1  |
|---|-----|-----|-----|-----|-----|-----|-----|-----|-----|-----|-----|-----|-----|-----|-----|-----|-----|-----|-----|-----|-----|-----|-----|-----|-----|
| A | 0.0 | 0.0 | 0.0 | 0.0 | 0.0 | 0.0 | 0.0 | 0.0 | 0.0 | 0.0 | 0.0 | 0.0 | 0.0 | 0.0 | 0.0 | 0.0 | 0.0 | 0.0 | 0.0 | 0.0 | 0.0 | 0.0 | 0.0 | 0.0 | 0.0 |
| C | 0.0 | 0.0 | 0.0 | 0.0 | 0.0 | 0.0 | 0.0 | 0.0 | 0.0 | 0.0 | 0.0 | 0.0 | 0.1 | 0.0 | 0.0 | 0.0 | 0.0 | 0.0 | 0.0 | 0.0 | 0.0 | 0.0 | 0.0 | 0.0 | 0.0 |
| G | 0.0 | 0.0 | 0.0 | 0.0 | 0.0 | 0.0 | 0.0 | 0.0 | 0.1 | 0.0 | 0.0 | 0.0 | 0.0 | 0.0 | 0.0 | 0.0 | 0.0 | 0.0 | 0.0 | 0.0 | 0.0 | 0.0 | 0.0 | 0.0 | 0.0 |
| T | 0.0 | 0.0 | 0.0 | 0.0 | 0.0 | 0.0 | 0.0 | 0.0 | 0.0 | 0.0 | 0.0 | 0.0 | 0.0 | 0.0 | 0.0 | 0.0 | 0.0 | 0.0 | 0.0 | 0.0 | 0.0 | 0.0 | 0.0 | 0.0 | 0.0 |

### c. Example of the background frequency and how to calculate log2ratio for promoter library

Promoter (cutoff=0;e xp1) - log2 odd-ratio (background bias) against uniform 40% GC bias

|   | -37  | -36  | -35  | -34  | -33  | -32  | -31  | -30  | -29  | -28  | -27  | -26  | -25  | -24  | -23  | -22  | -21  | -20  | -19  | -18  | -17  | -16  | -15  | -14  | -13  | T | A | T | A | A | T | -6   | -5   | -4   | -3   | -2   | -1   | +1   |
|---|------|------|------|------|------|------|------|------|------|------|------|------|------|------|------|------|------|------|------|------|------|------|------|------|------|---|---|---|---|---|---|------|------|------|------|------|------|------|
| A | -0.1 | -0.1 | 0.1  | -0.1 | -0.1 | -0.1 | -0.1 | -0.1 | -0.1 | -0.1 | 0.0  | 0.0  | -0.1 | -0.1 | 0.0  | -0.1 | -0.1 | -0.1 | -0.1 | -0.1 | -0.1 | -0.1 | -0.1 | 0.3  | -0.1 |   |   |   |   |   |   | 0.2  | -0.2 | 0.0  | 0.0  | 0.1  | -0.1 | -0.1 |
| C | 0.2  | 0.0  | -0.1 | -0.1 | -0.1 | -0.2 | -0.2 | -0.2 | -0.1 | -0.2 | -0.1 | -0.1 | -0.1 | -0.2 | -0.2 | -0.2 | -0.2 | -0.2 | -0.2 | -0.2 | -0.1 | -0.1 | -0.1 | -0.2 | -0.2 |   |   |   |   |   |   | -0.1 | 0.1  | 0.1  | -0.1 | -0.2 | -0.2 | -0.2 |
| G | -0.2 | 0.0  | 0.0  | -0.1 | 0.0  | 0.1  | 0.1  | 0.0  | 0.0  | 0.0  | 0.0  | 0.0  | 0.0  | 0.0  | 0.0  | 0.0  | 0.0  | 0.0  | 0.0  | 0.0  | 0.0  | 0.0  | 0.0  | -0.2 | 0.0  |   |   |   |   |   |   | -0.1 | -0.1 | -0.2 | -0.2 | 0.0  | 0.0  | 0.0  |
| T | 0.1  | 0.1  | 0.0  | 0.2  | 0.2  | 0.2  | 0.2  | 0.1  | 0.1  | 0.1  | 0.1  | 0.1  | 0.2  | 0.2  | 0.1  | 0.2  | 0.2  | 0.2  | 0.2  | 0.2  | 0.1  | 0.2  | 0.1  | -0.1 | 0.2  |   |   |   |   |   |   | -0.1 | 0.1  | 0.1  | 0.2  | 0.1  | 0.2  | 0.2  |

Promoter (cutoff=50; exp1) - log2 odd-ratio (background bias) against uniform 40% GC bias

|   | -37  | -36  | -35  | -34  | -33  | -32  | -31  | -30  | -29  | -28  | -27  | -26  | -25  | -24  | -23  | -22  | -21  | -20  | -19  | -18  | -17  | -16  | -15  | -14  | -13  | T | A | T | A | A | T | -6   | -5   | -4   | -3   | -2   | -1   | +1   |
|---|------|------|------|------|------|------|------|------|------|------|------|------|------|------|------|------|------|------|------|------|------|------|------|------|------|---|---|---|---|---|---|------|------|------|------|------|------|------|
| A | -0.1 | -0.1 | 0.1  | -0.1 | -0.1 | -0.1 | -0.1 | -0.1 | -0.1 | -0.1 | 0.0  | 0.0  | -0.1 | -0.1 | 0.0  | -0.1 | -0.1 | -0.1 | -0.1 | 0.0  | -0.1 | -0.1 | -0.1 | 0.3  | -0.1 |   |   |   |   |   |   | 0.2  | -0.2 | 0.0  | 0.0  | 0.1  | -0.1 | -0.1 |
| C | 0.2  | 0.0  | -0.1 | -0.1 | -0.1 | -0.2 | -0.2 | -0.2 | -0.1 | -0.2 | -0.1 | -0.2 | -0.1 | -0.2 | -0.2 | -0.2 | -0.2 | -0.2 | -0.2 | -0.2 | -0.1 | -0.1 | -0.1 | -0.2 | -0.2 |   |   |   |   |   |   | -0.1 | 0.1  | 0.1  | -0.1 | -0.2 | -0.3 | -0.2 |
| G | -0.2 | 0.0  | 0.1  | -0.1 | 0.0  | 0.1  | 0.1  | 0.0  | 0.0  | 0.0  | 0.0  | 0.0  | 0.0  | 0.0  | 0.0  | 0.0  | 0.0  | 0.0  | 0.0  | 0.0  | 0.0  | 0.0  | 0.0  | -0.2 | 0.0  |   |   |   |   |   |   | -0.1 | -0.1 | -0.2 | -0.2 | 0.0  | 0.0  | 0.0  |
| T | 0.1  | 0.1  | 0.0  | 0.2  | 0.2  | 0.2  | 0.2  | 0.1  | 0.1  | 0.1  | 0.1  | 0.1  | 0.2  | 0.2  | 0.1  | 0.2  | 0.2  | 0.2  | 0.2  | 0.2  | 0.1  | 0.2  | 0.2  | -0.1 | 0.2  |   |   |   |   |   |   | -0.1 | 0.1  | 0.1  | 0.2  | 0.1  | 0.2  | 0.2  |

Promoter (cutoff=50; exp1) - high productive promoter - log2odd ratio against uniform 40% GC bias

|   | -37  | -36  | -35  | -34  | -33  | -32  | -31  | -30  | -29  | -28  | -27  | -26  | -25  | -24  | -23  | -22  | -21  | -20  | -19  | -18  | -17  | -16  | -15  | -14  | -13  | T | A | T | A | A | T | -6   | -5   | -4   | -3   | -2   | -1   | +1   |
|---|------|------|------|------|------|------|------|------|------|------|------|------|------|------|------|------|------|------|------|------|------|------|------|------|------|---|---|---|---|---|---|------|------|------|------|------|------|------|
| A | -0.2 | -0.2 | 0.0  | -0.1 | -0.1 | -0.1 | 0.0  | 0.0  | 0.0  | 0.0  | -0.1 | 0.0  | -0.1 | -0.1 | 0.0  | 0.0  | 0.1  | -0.1 | 0.0  | 0.1  | -0.1 | 0.3  | 0.1  | 0.3  | -0.3 |   |   |   |   |   |   | 0.3  | 0.0  | 0.2  | 0.1  | 0.3  | 0.1  | -0.3 |
| C | 0.3  | 0.0  | -0.1 | 0.0  | 0.0  | -0.1 | -0.2 | -0.3 | -0.2 | -0.3 | -0.2 | -0.2 | -0.1 | -0.1 | -0.2 | -0.3 | -0.3 | -0.3 | -0.4 | -0.6 | -0.5 | -0.8 | -1.1 | -1.8 | -2.2 |   |   |   |   |   |   | -0.3 | -0.3 | -0.3 | -0.3 | -0.6 | -0.5 | -0.1 |
| G | -0.3 | -0.1 | 0.1  | 0.0  | 0.0  | -0.1 | -0.1 | -0.1 | -0.2 | -0.1 | 0.0  | 0.0  | 0.0  | 0.0  | 0.0  | 0.0  | -0.3 | -0.1 | -0.2 | -0.2 | -0.5 | -0.1 | -1.0 | 0.0  | 0.4  |   |   |   |   |   |   | -0.5 | -0.1 | -0.4 | -0.3 | -0.1 | -0.1 | -0.2 |
| T | 0.2  | 0.2  | 0.0  | 0.1  | 0.1  | 0.2  | 0.2  | 0.2  | 0.2  | 0.2  | 0.2  | 0.1  | 0.1  | 0.1  | 0.1  | 0.2  | 0.3  | 0.3  | 0.3  | 0.3  | 0.6  | 0.1  | 0.7  | 0.3  | 0.5  |   |   |   |   |   |   | 0.1  | 0.3  | 0.2  | 0.2  | 0.1  | 0.2  | 0.4  |

Promoter (cutoff=50; exp1) - low productive promoter - log2odd ratio against uniform 40% GC bias

|   | -37  | -36  | -35  | -34  | -33  | -32  | -31  | -30  | -29  | -28  | -27  | -26  | -25  | -24  | -23  | -22  | -21  | -20  | -19  | -18  | -17  | -16  | -15  | -14  | -13  | T | A | T | A | A | T | -6   | -5   | -4   | -3   | -2   | -1   | +1   |
|---|------|------|------|------|------|------|------|------|------|------|------|------|------|------|------|------|------|------|------|------|------|------|------|------|------|---|---|---|---|---|---|------|------|------|------|------|------|------|
| A | -0.1 | -0.1 | 0.1  | -0.1 | -0.1 | -0.2 | -0.2 | -0.1 | -0.1 | -0.1 | 0.0  | 0.0  | -0.1 | -0.1 | 0.0  | -0.1 | -0.2 | -0.1 | -0.2 | -0.2 | -0.1 | -0.4 | -0.2 | 0.2  | 0.0  |   |   |   |   |   |   | 0.1  | -0.3 | -0.2 | -0.1 | -0.1 | -0.1 | 0.1  |
| C | 0.2  | 0.0  | -0.1 | -0.1 | -0.2 | -0.2 | -0.2 | -0.1 | 0.0  | -0.1 | -0.1 | -0.1 | -0.2 | -0.2 | -0.2 | -0.2 | -0.2 | -0.1 | 0.0  | 0.0  | 0.1  | 0.2  | 0.3  | 0.3  | 0.4  |   |   |   |   |   |   | 0.1  | 0.4  | 0.3  | 0.0  | 0.0  | -0.1 | -0.3 |
| G | -0.1 | 0.0  | 0.0  | -0.1 | -0.1 | 0.1  | 0.1  | 0.1  | 0.1  | 0.1  | 0.0  | 0.0  | 0.0  | 0.0  | 0.0  | 0.0  | 0.2  | 0.1  | 0.1  | 0.1  | 0.3  | 0.0  | 0.4  | -0.3 | -0.4 |   |   |   |   |   |   | 0.1  | -0.1 | -0.1 | -0.1 | 0.0  | 0.1  | 0.1  |
| T | 0.0  | 0.0  | 0.0  | 0.2  | 0.2  | 0.2  | 0.2  | 0.1  | 0.1  | 0.1  | 0.1  | 0.1  | 0.1  | 0.2  | 0.2  | 0.2  | 0.1  | 0.1  | 0.1  | 0.1  | -0.2 | 0.2  | -0.3 | -0.4 | 0.0  |   |   |   |   |   |   | -0.3 | 0.0  | 0.0  | 0.1  | 0.1  | 0.1  | 0.0  |

Promoter (cutoff=50; exp1) - log2 odd-ratio between high and low productive promoter

|   | -37  | -36  | -35 | -34  | -33  | -32  | -31  | -30  | -29  | -28  | -27  | -26 | -25  | -24  | -23 | -22  | -21  | -20  | -19  | -18  | -17  | -16  | -15  | -14  | -13  | T | A | T | A | A | T | -6   | -5   | -4   | -3   | -2   | -1   | 1    |
|---|------|------|-----|------|------|------|------|------|------|------|------|-----|------|------|-----|------|------|------|------|------|------|------|------|------|------|---|---|---|---|---|---|------|------|------|------|------|------|------|
| A | -0.1 | -0.1 | 0.0 | 0.0  | 0.0  | 0.1  | 0.2  | 0.2  | 0.1  | 0.1  | 0.0  | 0.0 | 0.0  | 0.0  | 0.0 | 0.1  | 0.2  | 0.0  | 0.2  | 0.3  | -0.1 | 0.8  | 0.3  | 0.1  | -0.2 |   |   |   |   |   |   | 0.2  | 0.3  | 0.3  | 0.2  | 0.3  | 0.2  | -0.4 |
| C | 0.1  | 0.0  | 0.1 | 0.1  | 0.1  | 0.1  | 0.0  | -0.2 | -0.2 | -0.2 | -0.1 | 0.0 | 0.1  | 0.1  | 0.0 | -0.1 | -0.2 | -0.2 | -0.4 | -0.6 | -0.6 | -1.0 | -1.4 | -2.1 | -2.5 |   |   |   |   |   |   | -0.3 | -0.7 | -0.6 | -0.4 | -0.5 | -0.3 | 0.2  |
| G | -0.2 | -0.1 | 0.1 | 0.1  | 0.0  | -0.2 | -0.2 | -0.2 | -0.3 | -0.2 | -0.1 | 0.0 | 0.1  | 0.1  | 0.1 | -0.1 | -0.4 | -0.2 | -0.3 | -0.3 | -0.8 | -0.1 | -1.3 | 0.2  | 0.8  |   |   |   |   |   |   | -0.6 | 0.0  | -0.3 | -0.2 | -0.1 | -0.2 | -0.3 |
| T | 0.1  | 0.1  | 0.0 | -0.1 | -0.1 | 0.0  | 0.0  | 0.1  | 0.2  | 0.1  | 0.1  | 0.0 | -0.1 | -0.1 | 0.0 | 0.0  | 0.1  | 0.2  | 0.1  | 0.2  | 0.8  | -0.1 | 1.0  | 0.7  | 0.6  |   |   |   |   |   |   | 0.4  | 0.2  | 0.2  | 0.1  | 0.0  | 0.1  | 0.3  |

## Supplementary Table 9. Promoter motifs found by EXTREME program

Discovered sequence motifs (gapped kmers) in productive sequences using EXTREME - a motif discovery algorithm designed for high-throughput sequencing data.

### a. Motifs detected in promoter study

| Motif in promoter | # of cases found in high-productive sequences | # of cases found in low-productive sequences | Corrected Z-score | Z-score |
|-------------------|-----------------------------------------------|----------------------------------------------|-------------------|---------|
| ATAAAT            | 2439                                          | 1469                                         | 5.37              | 25.31   |
| TATAAA            | 3931                                          | 2637                                         | 5.34              | 25.20   |
| TAGNATA           | 1826                                          | 1002                                         | 5.22              | 26.03   |
| ATTNATA           | 2405                                          | 1427                                         | 5.19              | 25.89   |
| TATNAAA           | 2342                                          | 1390                                         | 5.12              | 25.53   |
| AATNNATA          | 2846                                          | 1704                                         | 5.37              | 27.67   |
| ATTNNNTAA         | 2778                                          | 1409                                         | 7.11              | 36.47   |
| TATNNNAAA         | 3586                                          | 2250                                         | 5.49              | 28.17   |
| ATTNNNAAT         | 1555                                          | 780                                          | 5.41              | 27.75   |
| TATNNNATA         | 3191                                          | 1981                                         | 5.30              | 27.19   |
| ATTNNNNAAT        | 1430                                          | 548                                          | 7.90              | 37.68   |
| TATNNNNNTAA       | 4278                                          | 2528                                         | 7.30              | 34.81   |
| TTANNNNAAA        | 2275                                          | 1301                                         | 5.66              | 27.00   |
| AATNNNNNAAT       | 2516                                          | 1511                                         | 5.42              | 25.85   |
| AATNNNNNNAAT      | 2117                                          | 1117                                         | 7.07              | 29.92   |
| ATTNNNNNAAA       | 2034                                          | 1125                                         | 6.41              | 27.10   |
| ATTNNNNNATA       | 3752                                          | 2464                                         | 6.14              | 25.95   |
| ATTNNNNNNTAA      | 2742                                          | 1918                                         | 5.06              | 18.81   |
| AATNNNNNNNNNAAA   | 1357                                          | 877                                          | 5.76              | 16.21   |
| AATNNNNNNNNNNAAA  | 1199                                          | 765                                          | 5.55              | 15.69   |

### b. Motifs detected in 5'-UTR study with strong promoter

*No motif detected in EXTREME*

### c. Motifs detected in 5'-UTR study with weak promoter

| Motif in 5'-UTR | # of cases found in high-productive sequences | # of cases found in low-productive sequences | Corrected Z-score | Z-score |
|-----------------|-----------------------------------------------|----------------------------------------------|-------------------|---------|
| AATTAT          | 816                                           | 314                                          | 5.48              | 28.33   |
| AATATA          | 943                                           | 389                                          | 5.43              | 28.09   |
| AAANTAT         | 863                                           | 337                                          | 5.75              | 28.65   |
| AATNATA         | 783                                           | 308                                          | 5.43              | 27.07   |
| AAANAAT         | 909                                           | 401                                          | 5.09              | 25.37   |
| AAANATA         | 922                                           | 411                                          | 5.06              | 25.21   |
| AAANTAA         | 884                                           | 389                                          | 5.03              | 25.10   |
| AAANNATT        | 847                                           | 335                                          | 5.75              | 27.97   |
| AAANNATA        | 887                                           | 362                                          | 5.67              | 27.59   |

|                 |      |     |      |       |
|-----------------|------|-----|------|-------|
| TAANNATA        | 757  | 298 | 5.46 | 26.59 |
| AAANNAAA        | 1032 | 467 | 5.37 | 26.15 |
| AATNNTAA        | 750  | 303 | 5.28 | 25.68 |
| AAANNTAT        | 757  | 312 | 5.18 | 25.19 |
| AAANNAAT        | 832  | 360 | 5.11 | 24.88 |
| AATNNATA        | 668  | 265 | 5.09 | 24.76 |
| AAANNNATA       | 831  | 320 | 6.08 | 28.57 |
| TAANNNATA       | 708  | 271 | 5.65 | 26.55 |
| AAANNNTTA       | 820  | 335 | 5.64 | 26.50 |
| TAANNNTAA       | 728  | 289 | 5.50 | 25.82 |
| AAANNNAAT       | 797  | 350 | 5.09 | 23.89 |
| AAANNNTAA       | 817  | 363 | 5.07 | 23.83 |
| AAANNNATT       | 768  | 336 | 5.02 | 23.57 |
| AAANNNNATA      | 767  | 327 | 5.40 | 24.33 |
| AAANNNTAT       | 758  | 322 | 5.40 | 24.30 |
| ATANNNTAA       | 642  | 263 | 5.19 | 23.37 |
| TAANNNNATA      | 657  | 273 | 5.16 | 23.24 |
| AAANNNAAT       | 744  | 327 | 5.12 | 23.06 |
| AAANNNNNATA     | 725  | 291 | 5.84 | 25.44 |
| ATANNNNNTTA     | 632  | 249 | 5.57 | 24.27 |
| AAANNNNNNATA    | 657  | 278 | 5.39 | 22.73 |
| TAANNNNNNATA    | 564  | 229 | 5.25 | 22.14 |
| ATANNNNNTTA     | 560  | 236 | 5.00 | 21.09 |
| ATANNNNNNNATA   | 542  | 231 | 5.02 | 20.46 |
| TAANNNNNNNNATA  | 489  | 201 | 5.14 | 20.31 |
| AATNNNNNNNNNAAT | 437  | 174 | 5.18 | 19.94 |

### Supplementary Table 10. DAMRatios of alternative Pribnow motifs

Average log<sub>10</sub>(DAMRatio) of Pribnow in the screen follows the tendency of endogenous alternative Pribnow frequency and Pribnow motif score (up to two mutations in TATAAT allowed). To calculate the average log<sub>10</sub>(DAMRatio), we used cases having alternative Pribnow motifs in their 1-25 and 1-20 promoter region in the transcription screen. We show that none of the regions are biased towards upstream enrichment of TATAAT motif. \*Based on Veronica Llorens-Rico *et al.*, see Methods. Canonical Pribnow is TANAAT. Y=yes, N=no.

| Alternative Pribnow | Found in endogenous promoters |                           | Pribnow motif score* | Average log <sub>10</sub> (DAMRatio) in screen |                                 | Canonical Pribnow? |
|---------------------|-------------------------------|---------------------------|----------------------|------------------------------------------------|---------------------------------|--------------------|
|                     | Count in -15 to -1            | Log <sub>10</sub> (count) | Pribnow probability  | Alternative Pribnow (From 1-25)                | Alternative Pribnow (From 1-20) |                    |
| TAAAAT              | 244                           | 2.387                     | 0.302                | 1.063                                          | 0.933                           | Y                  |
| TATAAT              | 122                           | 2.086                     | 0.165                | 1.165                                          | 1.042                           | Y                  |
| TAGAAT              | 83                            | 1.919                     | 0.065                | 0.886                                          | 0.745                           | Y                  |
| TACAAT              | 77                            | 1.886                     | 0.058                | 0.991                                          | 0.919                           | Y                  |
| TAAGAT              | 42                            | 1.623                     | 0.027                | 0.784                                          | 0.681                           | N                  |
| TAATAT              | 27                            | 1.431                     | 0.025                | 0.959                                          | 0.826                           | N                  |
| TATTAT              | 26                            | 1.415                     | 0.013                | 0.858                                          | 0.709                           | N                  |
| TAACAT              | 16                            | 1.204                     | 0.017                | 0.820                                          | 0.778                           | N                  |
| TACTAT              | 15                            | 1.176                     | 0.005                | 0.746                                          | 0.669                           | N                  |
| TATGAT              | 11                            | 1.041                     | 0.015                | 0.742                                          | 0.669                           | N                  |
| TATCAT              | 10                            | 1.000                     | 0.009                | 0.819                                          | 0.720                           | N                  |
| TAGTAT              | 5                             | 0.699                     | 0.005                | 0.866                                          | 0.764                           | N                  |
| TAGCAT              | 4                             | 0.602                     | 0.004                | 0.686                                          | 0.676                           | N                  |
| TACCAT              | 3                             | 0.477                     | 0.003                | 0.696                                          | 0.700                           | N                  |
| TAGGAT              | 3                             | 0.477                     | 0.006                | 0.686                                          | 0.666                           | N                  |
| TACGAT              | 1                             | 0.000                     | 0.005                | 0.698                                          | 0.676                           | N                  |
| TAAACT              | 73                            | 1.863                     | 0.047                | 0.782                                          | 0.805                           | N                  |
| TATACT              | 10                            | 1.000                     | 0.025                | 0.821                                          | 0.816                           | N                  |
| GAAAAT              | 14                            | 1.146                     | 0.018                | 0.879                                          | 0.763                           | N                  |
| CAAAAT              | 17                            | 1.230                     | 0.016                | 0.801                                          | 0.688                           | N                  |
| TAAAGT              | 16                            | 1.204                     | 0.014                | 0.770                                          | 0.701                           | N                  |
| GATAAT              | 18                            | 1.255                     | 0.010                | 0.890                                          | 0.795                           | N                  |
| TAGACT              | 4                             | 0.602                     | 0.010                | 0.670                                          | 0.719                           | N                  |
| TACACT              | 7                             | 0.845                     | 0.009                | 0.700                                          | 0.761                           | N                  |
| CATAAT              | 21                            | 1.322                     | 0.009                | 0.900                                          | 0.809                           | N                  |
| TATAGT              | 13                            | 1.114                     | 0.007                | 0.760                                          | 0.717                           | N                  |
| TAAAAC              | 10                            | 1.000                     | 0.007                | 0.670                                          | 0.692                           | N                  |

### Supplementary Table 11. Odd-ratio differences from the no-constraint case in the transcription screen

Log2 odd-ratio calculated between high- and low-productive promoters for the sequences having the four +1 bases. The numbers represent the differential odd-ratio from all cases. The table is pseudocoloured to highlight the differences.

|             |   | -37 | -36  | -35  | -34 | -33  | -32  | -31  | -30  | -29  | -28  | -27  | -26  | -25  | -24  | -23  | -22  | -21  | -20 | -19  | -18  | -17  | -16  | -15  | -14  | -13  | T | A | T | A | A | T   | -6   | -5   | -4   | -3   | -2   | -1   | +1 |
|-------------|---|-----|------|------|-----|------|------|------|------|------|------|------|------|------|------|------|------|------|-----|------|------|------|------|------|------|------|---|---|---|---|---|-----|------|------|------|------|------|------|----|
| <b>+1=A</b> | A | 0.0 | -0.1 | 0.0  | 0.0 | 0.0  | 0.0  | 0.0  | 0.0  | 0.0  | 0.0  | 0.1  | 0.0  | 0.0  | 0.0  | 0.0  | 0.0  | 0.0  | 0.0 | 0.0  | 0.0  | -0.1 | 0.1  | 0.0  | 0.0  | 0.0  |   |   |   |   |   |     | 0.0  | 0.0  | 0.0  | 0.0  | -0.1 | 0.1  |    |
|             | C | 0.0 | 0.0  | 0.0  | 0.0 | 0.0  | 0.0  | -0.1 | -0.1 | 0.0  | 0.0  | 0.0  | 0.0  | 0.0  | 0.0  | 0.1  | 0.0  | 0.0  | 0.0 | -0.1 | 0.0  | -0.1 | -0.3 | -0.3 | -0.1 | -0.1 |   |   |   |   |   |     | 0.0  | 0.0  | 0.1  | 0.1  | 0.2  | 0.2  |    |
|             | G | 0.0 | 0.0  | 0.0  | 0.0 | 0.0  | 0.0  | 0.0  | 0.0  | 0.0  | 0.0  | 0.0  | 0.0  | 0.0  | 0.1  | 0.0  | 0.0  | 0.0  | 0.0 | 0.0  | 0.0  | 0.0  | 0.0  | -0.3 | 0.1  | 0.1  |   |   |   |   |   |     | 0.0  | 0.0  | 0.0  | 0.1  | 0.0  | -0.6 |    |
|             | T | 0.0 | 0.0  | 0.0  | 0.0 | 0.0  | 0.0  | 0.0  | 0.0  | 0.0  | 0.0  | 0.0  | 0.0  | 0.0  | 0.0  | 0.0  | 0.0  | 0.0  | 0.0 | 0.0  | 0.0  | 0.0  | 0.0  | 0.1  | 0.0  | 0.0  |   |   |   |   |   |     | 0.0  | 0.0  | 0.0  | -0.1 | 0.0  | 0.1  |    |
| <b>+1=C</b> | A | 0.0 | 0.1  | 0.0  | 0.0 | 0.0  | 0.0  | -0.1 | -0.1 | 0.0  | 0.0  | 0.0  | 0.0  | 0.0  | 0.1  | 0.0  | 0.1  | 0.1  | 0.0 | 0.0  | 0.0  | -0.1 | 0.0  | 0.1  | 0.0  |      |   |   |   |   |   | 0.1 | 0.1  | 0.0  | 0.0  | 0.1  | -0.4 |      |    |
|             | C | 0.0 | 0.0  | 0.0  | 0.0 | 0.0  | 0.1  | 0.0  | 0.0  | 0.1  | 0.1  | 0.0  | 0.0  | 0.0  | -0.1 | 0.0  | 0.0  | -0.1 | 0.0 | 0.0  | 0.0  | 0.2  | 0.0  | 0.1  | -0.1 |      |   |   |   |   |   | 0.0 | -0.1 | -0.1 | -0.2 | -0.2 | -0.2 |      |    |
|             | G | 0.0 | 0.0  | 0.0  | 0.0 | 0.0  | -0.1 | 0.0  | 0.1  | -0.1 | -0.1 | 0.0  | 0.1  | 0.0  | 0.0  | -0.1 | 0.0  | 0.0  | 0.0 | 0.0  | 0.0  | -0.1 | 0.1  | 0.0  | 0.0  |      |   |   |   |   |   | 0.0 | -0.1 | 0.0  | 0.0  | 0.0  | -0.1 |      |    |
|             | T | 0.0 | 0.0  | -0.1 | 0.0 | 0.0  | 0.0  | 0.0  | 0.1  | 0.0  | 0.0  | 0.0  | 0.0  | 0.0  | 0.0  | 0.0  | 0.0  | 0.0  | 0.0 | 0.0  | 0.0  | 0.0  | 0.0  | 0.0  | 0.0  | 0.1  |   |   |   |   |   |     | -0.1 | 0.0  | 0.0  | 0.0  | 0.1  | 0.5  |    |
| <b>+1=G</b> | A | 0.0 | 0.0  | -0.1 | 0.0 | 0.0  | 0.1  | 0.1  | 0.1  | 0.0  | 0.0  | 0.1  | 0.0  | 0.0  | -0.1 | 0.0  | 0.0  | 0.1  | 0.0 | 0.0  | -0.1 | 0.1  | 0.0  | 0.0  | 0.0  |      |   |   |   |   |   | 0.0 | 0.0  | 0.0  | 0.1  | 0.0  | -0.1 |      |    |
|             | C | 0.0 | 0.0  | 0.0  | 0.0 | -0.1 | 0.0  | -0.1 | 0.0  | 0.0  | 0.0  | 0.0  | 0.0  | 0.0  | 0.1  | -0.1 | 0.0  | -0.1 | 0.0 | 0.0  | -0.1 | 0.0  | -0.3 | -0.3 | -0.3 | -0.1 |   |   |   |   |   |     | -0.1 | -0.1 | -0.1 | 0.0  | -0.1 | 0.1  |    |
|             | G | 0.0 | 0.0  | 0.1  | 0.1 | 0.0  | 0.0  | 0.0  | 0.0  | 0.0  | 0.0  | -0.1 | 0.1  | 0.0  | 0.0  | 0.1  | 0.0  | 0.0  | 0.1 | 0.0  | 0.0  | -0.2 | 0.0  | -0.2 | 0.1  | 0.0  |   |   |   |   |   |     | 0.0  | 0.0  | -0.1 | -0.1 | 0.1  | -0.1 |    |
|             | T | 0.0 | 0.0  | 0.0  | 0.0 | 0.0  | 0.0  | 0.0  | 0.0  | 0.0  | 0.0  | 0.0  | 0.0  | 0.0  | 0.0  | 0.0  | 0.0  | 0.0  | 0.0 | 0.0  | 0.0  | 0.1  | 0.0  | 0.1  | 0.0  | 0.0  |   |   |   |   |   |     | 0.0  | 0.0  | 0.1  | -0.1 | 0.0  | 0.1  |    |
| <b>+1=T</b> | A | 0.0 | 0.0  | 0.0  | 0.0 | 0.0  | 0.0  | 0.0  | 0.0  | 0.0  | 0.0  | 0.0  | 0.0  | 0.1  | 0.0  | 0.0  | -0.1 | 0.0  | 0.0 | 0.0  | 0.1  | -0.1 | 0.0  | 0.0  | 0.0  |      |   |   |   |   |   | 0.0 | -0.1 | 0.0  | -0.1 | 0.0  | 0.2  |      |    |
|             | C | 0.0 | 0.0  | 0.0  | 0.0 | 0.0  | 0.0  | 0.0  | 0.0  | 0.0  | 0.0  | 0.0  | 0.0  | -0.1 | 0.0  | 0.0  | 0.0  | 0.1  | 0.0 | 0.1  | 0.1  | 0.2  | 0.2  | 0.1  | 0.1  |      |   |   |   |   |   | 0.1 | 0.1  | 0.0  | 0.0  | 0.0  | -0.1 |      |    |
|             | G | 0.0 | 0.0  | 0.0  | 0.0 | 0.0  | 0.1  | 0.0  | 0.0  | 0.0  | 0.0  | 0.0  | -0.1 | 0.0  | 0.0  | 0.0  | 0.0  | 0.0  | 0.0 | 0.0  | 0.0  | 0.1  | 0.0  | 0.2  | 0.0  | 0.0  |   |   |   |   |   |     | 0.0  | 0.0  | 0.1  | 0.0  | 0.0  | 0.4  |    |
|             | T | 0.0 | 0.0  | 0.0  | 0.0 | 0.0  | 0.0  | 0.0  | 0.0  | 0.0  | 0.0  | 0.0  | 0.0  | 0.0  | 0.0  | 0.0  | 0.0  | 0.0  | 0.0 | 0.0  | 0.0  | -0.1 | 0.0  | -0.1 | 0.0  | 0.0  |   |   |   |   |   |     | 0.0  | 0.0  | 0.0  | 0.1  | -0.1 | -0.4 |    |



## Supplementary Table 12. TSS effect on 4 validation 5'-UTRs and leaderless constructs

The first base of the indicated constructs (UTRs 1,2,7 and 8, Supplementary Table 2 or a leaderless Dam, i.e., they start at the 1st indicated base) were changed to the other 3 bases. Dam protein amounts were determined by Western blot (WB) with an anti-Flag antibody, activity by qPCR (with a genomic "gGATC" or the 4xGATCs of the reporter cassette), and mRNA by RT-qPCR (2 sets of oligos were used; normalized with MPN517 gene). Stdev is the Standard deviation (n=2 for WB, n=3 for qPCR).

### a. Effect of the first nucleotide bias in four validation UTR constructs

| Construct    | Protein |       | Activity   |       |             |       | mRNA     |       |            |       |
|--------------|---------|-------|------------|-------|-------------|-------|----------|-------|------------|-------|
|              | WB      |       | qPCR gGATC |       | qPCR 4xGATC |       | qPCR dam |       | qPCR dam 2 |       |
|              | Average | Stdev | Average    | Stdev | Average     | Stdev | Average  | Stdev | Average    | Stdev |
| SyP32-UTR1-A | 5.12    | 0.53  | 1.71       | 0.64  | 6.81        | 0.64  | 6.81     | 2.54  | 51.79      | 15.81 |
| SyP32-UTR1-C | 3.58    | 0.19  | 4.02       | 0.75  | 21.11       | 0.75  | 4.63     | 1.16  | 21.40      | 1.28  |
| SyP32-UTR1-G | 3.96    | 1.00  | 2.93       | 0.75  | 9.25        | 0.75  | 7.82     | 0.67  | 28.93      | 1.68  |
| SyP32-UTR1-T | 3.21    | 0.70  | 1.98       | 0.16  | 4.73        | 0.16  | 6.52     | 0.50  | 38.66      | 4.73  |
| SyP32-UTR2-A | 4.18    | 0.09  | 1.65       | 0.27  | 28.74       | 0.27  | 7.43     | 2.95  | 30.32      | 3.62  |
| SyP32-UTR2-C | 3.09    | 0.16  | 1.39       | 0.19  | 2.58        | 0.19  | 4.88     | 1.23  | 19.14      | 2.83  |
| SyP32-UTR2-G | 4.43    | 0.82  | 1.95       | 0.54  | 4.67        | 0.54  | 7.55     | 2.29  | 32.69      | 4.98  |
| SyP32-UTR2-T | 1.78    | 0.34  | 0.80       | 0.29  | 1.29        | 0.29  | 4.54     | 1.59  | 15.53      | 2.66  |
| SyP32-UTR7-A | 0.57    | 0.09  | 0.42       | 0.04  | 0.47        | 0.04  | 1.65     | 0.59  | 6.0        | 1.89  |
| SyP32-UTR7-C | 0.25    | 0.07  | 0.10       | 0.03  | 0.01        | 0.03  | 1.40     | 0.40  | 7.37       | 0.69  |
| SyP32-UTR7-G | 0.45    | 0.14  | 0.19       | 0.06  | 0.04        | 0.06  | 3.07     | 0.90  | 16.15      | 3.26  |
| SyP32-UTR7-T | 0.13    | 0.05  | 0.07       | 0.06  | 0.001       | 0.06  | 0.80     | 0.21  | 3.17       | 0.15  |
| SyP32-UTR8-A | 0.13    | 0.07  | 0.05       | 0.03  | 0.002       | 0.03  | 0.43     | 0.05  | 2.08       | 0.27  |
| SyP32-UTR8-C | 0.04    | 0.005 | 0.01       | 0.01  | 0.001       | 0.01  | 0.35     | 0.12  | 2.41       | 0.15  |
| SyP32-UTR8-G | 0.04    | 0.01  | 0.04       | 0.02  | 0.002       | 0.02  | 0.37     | 0.08  | 2.65       | 0.27  |
| SyP32-UTR8-T | 0.02    | 0.002 | 0.01       | 0.001 | 0.001       | 0.001 | 0.20     | 0.09  | 1.48       | 0.22  |

### b. Effect of the first nucleotide bias in leaderless constructs

| Construct   | Protein |         | Activity   |       |             |         | mRNA     |         |            |         |
|-------------|---------|---------|------------|-------|-------------|---------|----------|---------|------------|---------|
|             | WB      |         | qPCR gGATC |       | qPCR 4xGATC |         | qPCR dam |         | qPCR dam 2 |         |
|             | Average | Stdev   | Average    | Stdev | Average     | Stdev   | Average  | Stdev   | Average    | Stdev   |
| SyP32-ATG   | 3.68    | 0.97473 | 9.00       | 2.087 | 6.41        | 0.5446  | 13.03    | 3.57023 | 77.68      | 7.0837  |
| SyP32-CTG   | 0.31    | 0.06588 | 0.00       | 2E-04 | 0.01        | 0.0067  | 0.59     | 0.11854 | 7.89       | 1.0617  |
| SyP32-GTG   | 1.17    | 0.53563 | 1.85       | 0.183 | 1.29        | 0.12149 | 8.38     | 3.2718  | 82.45      | 6.07347 |
| SyP32-TTG   | 0.19    | 0.1291  | 0.00       | 0.001 | 0.02        | 0.00325 | 0.87     | 0.3111  | 13.14      | 2.42451 |
| lImp200-ATG | 1.19    | 0.28836 | 4.12       | 4.757 | 10.66       | 6.59311 | 4.12     | 4.75667 | 10.66      | 6.59311 |
| lImp200-CTG | 0.05    | 0.02917 | 0.08       | 0.026 | 1.02        | 0.31714 | 0.08     | 0.02566 | 1.02       | 0.31714 |
| lImp200-GTG | 0.34    | 0.00614 | 0.52       | 0.053 | 1.32        | 0.41171 | 0.52     | 0.05314 | 1.32       | 0.41171 |
| lImp200-TTG | 0.03    | 0.02034 | 0.32       | 0.094 | 3.62        | 2.7571  | 0.32     | 0.09397 | 3.62       | 2.7571  |

### Supplementary Table 13. Effect of the translation efficiency on mRNA levels

The dam TSC inside a small (ATC) 5'-UTR was mutated to all other bases. ATG and GTG TSCs have the best translation efficiency. See Supplementary Table 12 legend.

| Construct     | Protein |       | Activity   |       |             |       | mRNA     |       |            |       |
|---------------|---------|-------|------------|-------|-------------|-------|----------|-------|------------|-------|
|               | WB      |       | qPCR gGATC |       | qPCR 4xGATC |       | qPCR dam |       | qPCR dam 2 |       |
|               | Average | Stdev | Average    | Stdev | Average     | Stdev | Average  | Stdev | Average    | Stdev |
| SyP32-ATC-ATG | 5.98    | 1.30  | 3.28       | 0.61  | 1.87        | 0.07  | 108.41   | 24.76 | 241.32     | 89.47 |
| SyP32-ATC-CTG | 0.35    | 0.15  | 0.03       | 0.00  | 0.01        | 0.004 | 1.58     | 0.19  | 5.84       | 1.05  |
| SyP32-ATC-GTG | 5.88    | 1.81  | 0.78       | 0.18  | 0.16        | 0.06  | 17.68    | 2.68  | 43.06      | 7.41  |
| SyP32-ATC-TTG | 4.06    | 1.57  | 0.67       | 0.08  | 0.08        | 0.02  | 18.90    | 2.46  | 31.82      | 36.67 |

### Supplementary Table 14. Endogenous mRNA alternative ATG sites

The number of alternative ATG-containing genes and evaluation of the percentage of genes having an alternative ATG near the TSC. We compared them with randomized sequences as null model.

|                                                                | # of genes having alternative ATGs in 5'-UTR | # of genes not having alternative ATGs in 5'-UTR | # of genes having ATGs <12nt from the actual TSC | % ATG <12nt |
|----------------------------------------------------------------|----------------------------------------------|--------------------------------------------------|--------------------------------------------------|-------------|
| Endogenous genes                                               | 265                                          | 469                                              | 22                                               | 8%          |
| Random genes generated with the same length as endogenous gene | 308                                          | 426                                              | 66                                               | 21%         |

### Supplementary Table 15. ATG downstream nucleotide effect

Average DAMRatios (log<sub>10</sub>) when alternative ATG is in-frame (=frame 0) or out-of-frame (=frame 1 or 2). The DAMRatios used here were from Experiment 1 with strong promoter. We divided the sequences according to the distance between the ATG and the TSC (-/+12 nt). Statistically significant cases are highlighted. Stdev is the standard deviation.

#### a. ATG is located within the -25 to -13 positions of the 5'-UTR

| First 5nt | Average log <sub>10</sub> (DAM Ratio) frame 0 | Stdev log <sub>10</sub> (DAM Ratio) frame 0 | Average log <sub>10</sub> (DAM Ratio) frame 1 | Stdev log <sub>10</sub> (DAM Ratio) frame 1 | Average log <sub>10</sub> (DAM Ratio) frame 2 | Stdev log <sub>10</sub> (DAM Ratio) frame 2 | Difference between in-frame and out-of-frame TSC | P-value (t-test) |
|-----------|-----------------------------------------------|---------------------------------------------|-----------------------------------------------|---------------------------------------------|-----------------------------------------------|---------------------------------------------|--------------------------------------------------|------------------|
| ATGAA     | 0.70                                          | 0.90                                        | 0.62                                          | 0.84                                        | 0.87                                          | 0.91                                        | -0.05                                            | 0.52             |
| ATGAC     | 0.65                                          | 0.87                                        | 0.44                                          | 0.79                                        | 0.77                                          | 0.88                                        | 0.04                                             | 0.91             |
| ATGAG     | 0.79                                          | 0.96                                        | 0.65                                          | 0.92                                        | 0.95                                          | 0.99                                        | -0.01                                            | 0.84             |
| ATGAT     | 0.73                                          | 0.94                                        | 0.56                                          | 0.87                                        | 0.64                                          | 0.87                                        | 0.13                                             | 0.22             |
| ATGCA     | 0.74                                          | 0.99                                        | 0.61                                          | 0.88                                        | 0.88                                          | 0.90                                        | -0.01                                            | 0.93             |
| ATGCC     | 0.68                                          | 0.85                                        | 0.62                                          | 0.82                                        | 0.63                                          | 0.86                                        | 0.06                                             | 0.64             |
| ATGCG     | 0.46                                          | 0.84                                        | 0.64                                          | 0.84                                        | 0.69                                          | 0.81                                        | -0.20                                            | 0.09             |
| ATGCT     | 0.63                                          | 0.84                                        | 0.78                                          | 0.92                                        | 0.68                                          | 0.83                                        | -0.10                                            | 0.47             |
| ATGGA     | 1.02                                          | 0.91                                        | 0.92                                          | 0.87                                        | 0.73                                          | 0.93                                        | 0.19                                             | 0.19             |
| ATGGC     | 0.51                                          | 0.78                                        | 0.57                                          | 0.83                                        | 0.55                                          | 0.82                                        | -0.05                                            | 0.71             |
| ATGGG     | 1.09                                          | 1.00                                        | 0.49                                          | 0.86                                        | 0.91                                          | 0.94                                        | 0.40                                             | 0.03             |
| ATGGT     | 0.70                                          | 0.92                                        | 0.74                                          | 0.89                                        | 0.76                                          | 0.85                                        | -0.05                                            | 0.75             |
| ATGTA     | 0.76                                          | 0.81                                        | 0.82                                          | 0.94                                        | 0.70                                          | 0.85                                        | 0.00                                             | 0.95             |
| ATGTC     | 0.75                                          | 0.84                                        | 0.67                                          | 0.90                                        | 0.67                                          | 0.81                                        | 0.08                                             | 0.46             |
| ATGTG     | 0.68                                          | 0.87                                        | 0.81                                          | 0.88                                        | 0.73                                          | 0.91                                        | -0.09                                            | 0.53             |
| ATGTT     | 0.57                                          | 0.86                                        | 0.65                                          | 0.91                                        | 0.69                                          | 0.89                                        | -0.10                                            | 0.41             |

#### b. ATG is located within the -12 to -3 positions of the 5'-UTR

| First 5nt | Average log <sub>10</sub> (DAM Ratio) frame 0 | Stdev log <sub>10</sub> (DAM Ratio) frame 0 | Average log <sub>10</sub> (DAM Ratio) frame 1 | Stdev log <sub>10</sub> (DAM Ratio) frame 1 | Average log <sub>10</sub> (DAM Ratio) frame 2 | Stdev log <sub>10</sub> (DAM Ratio) frame 2 | Difference between in-frame and out-of-frame TSC | P-value (t-test) |
|-----------|-----------------------------------------------|---------------------------------------------|-----------------------------------------------|---------------------------------------------|-----------------------------------------------|---------------------------------------------|--------------------------------------------------|------------------|
| ATGAA     | 0.87                                          | 1.03                                        | 0.25                                          | 0.58                                        | 0.11                                          | 0.52                                        | 0.69                                             | 3.32E-16         |
| ATGAC     | 0.97                                          | 1.03                                        | 0.23                                          | 0.51                                        | 0.43                                          | 0.72                                        | 0.63                                             | 1.26E-07         |
| ATGAG     | 0.75                                          | 0.99                                        | 0.30                                          | 0.73                                        | 0.40                                          | 0.61                                        | 0.40                                             | 0.010            |
| ATGAT     | 0.83                                          | 0.96                                        | 0.43                                          | 0.79                                        | 0.32                                          | 0.71                                        | 0.45                                             | 3.87E-06         |
| ATGCA     | 0.88                                          | 1.00                                        | 0.45                                          | 0.73                                        | 0.30                                          | 0.64                                        | 0.51                                             | 9.94E-07         |
| ATGCC     | 0.70                                          | 0.88                                        | 0.32                                          | 0.64                                        | 0.31                                          | 0.51                                        | 0.39                                             | 0.002            |
| ATGCG     | 0.88                                          | 0.92                                        | 0.14                                          | 0.49                                        | 0.27                                          | 0.74                                        | 0.67                                             | 2.18E-07         |
| ATGCT     | 0.51                                          | 0.72                                        | 0.40                                          | 0.75                                        | 0.27                                          | 0.68                                        | 0.17                                             | 0.187            |
| ATGGA     | 0.69                                          | 0.76                                        | 0.15                                          | 0.45                                        | 0.17                                          | 0.58                                        | 0.53                                             | 7.22E-07         |
| ATGGC     | 0.49                                          | 0.80                                        | 0.15                                          | 0.41                                        | 0.31                                          | 0.62                                        | 0.25                                             | 0.057            |
| ATGGG     | 0.90                                          | 0.96                                        | 0.15                                          | 0.41                                        | 0.18                                          | 0.45                                        | 0.74                                             | 3.11E-07         |
| ATGGT     | 0.66                                          | 0.82                                        | 0.45                                          | 0.82                                        | 0.23                                          | 0.45                                        | 0.32                                             | 0.033            |
| ATGTA     | 0.48                                          | 0.78                                        | 0.30                                          | 0.68                                        | 0.97                                          | 0.89                                        | -0.16                                            | 0.065            |
| ATGTC     | 1.06                                          | 0.97                                        | 0.41                                          | 0.74                                        | 0.58                                          | 0.92                                        | 0.56                                             | 0.0002           |
| ATGTG     | 0.19                                          | 0.50                                        | 0.34                                          | 0.62                                        | 0.38                                          | 0.67                                        | -0.18                                            | 0.134            |
| ATGTT     | 0.78                                          | 0.87                                        | 0.34                                          | 0.75                                        | 0.46                                          | 0.76                                        | 0.37                                             | 0.017            |



|   |    |     |     |   |     |     |     |     |     |     |     |     |     |     |     |     |     |     |     |     |     |     |     |     |     |
|---|----|-----|-----|---|-----|-----|-----|-----|-----|-----|-----|-----|-----|-----|-----|-----|-----|-----|-----|-----|-----|-----|-----|-----|-----|
| G | NA | 1   | 0.9 | 1 | 1   | 1.1 | 1.3 | 1.2 | 1.1 | 1   | 0.9 | 0.8 | 0.9 | 0.8 | 0.9 | 0.9 | 0.8 | 0.8 | 0.8 | 0.9 | 0.9 | 0.9 | 0.9 | 0.9 | 0.8 |
| T | 1  | 0.6 | 0.9 | 1 | 1.1 | 0.9 | 0.8 | 0.8 | 0.9 | 0.9 | 1   | 1   | 1   | 1.1 | 1.1 | 1   | 1   | 1   | 1   | 1   | 1.1 | 1   | 0.9 | 1   | 1.2 |

**Average**

|   |     |     |     |     |     |     |     |     |     |     |     |     |     |     |     |     |     |     |     |     |     |     |     |     |     |
|---|-----|-----|-----|-----|-----|-----|-----|-----|-----|-----|-----|-----|-----|-----|-----|-----|-----|-----|-----|-----|-----|-----|-----|-----|-----|
|   | -25 | -24 | -23 | -22 | -21 | -20 | -19 | -18 | -17 | -16 | -15 | -14 | -13 | -12 | -11 | -10 | -9  | -8  | -7  | -6  | -5  | -4  | -3  | -2  | -1  |
| A | NA  | 1.2 | 1.2 | 1.1 | 1.1 | 1.1 | 1.1 | 1.1 | 1.1 | 1.1 | 1.1 | 1.1 | 1.1 | 1   | 1   | 1   | 1   | 1.1 | 1.1 | 1.1 | 1.1 | 1.1 | 1.1 | 1.1 | 1   |
| C | NA  | 0.8 | 0.8 | 0.9 | 0.9 | 0.9 | 0.9 | 0.9 | 0.9 | 0.9 | 1   | 0.9 | 1   | 1   | 1   | 1   | 1   | 1   | 1   | 1   | 1   | 1   | 0.9 | 0.9 | 1   |
| G | NA  | 1   | 1   | 1   | 1   | 1   | 1.1 | 1.1 | 1   | 1   | 0.9 | 0.9 | 0.9 | 0.9 | 0.9 | 0.9 | 0.9 | 0.9 | 0.9 | 0.9 | 0.9 | 0.9 | 1   | 0.9 | 0.9 |
| T | NA  | 0.9 | 1   | 0.9 | 1   | 1   | 0.9 | 0.9 | 1   | 1   | 1   | 1   | 1   | 1   | 1   | 1   | 1   | 1   | 1   | 1   | 1   | 1   | 1   | 1   | 1.1 |

**Standard deviation**

|   |     |     |     |     |     |     |     |     |     |     |     |     |     |     |     |     |    |     |    |    |    |    |    |    |    |
|---|-----|-----|-----|-----|-----|-----|-----|-----|-----|-----|-----|-----|-----|-----|-----|-----|----|-----|----|----|----|----|----|----|----|
|   | -25 | -24 | -23 | -22 | -21 | -20 | -19 | -18 | -17 | -16 | -15 | -14 | -13 | -12 | -11 | -10 | -9 | -8  | -7 | -6 | -5 | -4 | -3 | -2 | -1 |
| A | NA  | 0.3 | 0.1 | 0.1 | 0.1 | 0.1 | 0.1 | 0.1 | 0   | 0.1 | 0   | 0   | 0   | 0   | 0   | 0   | 0  | 0   | 0  | 0  | 0  | 0  | 0  | 0  | 0  |
| C | NA  | 0.2 | 0.1 | 0.1 | 0.1 | 0.1 | 0.1 | 0.1 | 0   | 0   | 0   | 0   | 0   | 0   | 0   | 0   | 0  | 0   | 0  | 0  | 0  | 0  | 0  | 0  | 0  |
| G | NA  | 0.1 | 0.1 | 0   | 0   | 0   | 0.1 | 0.1 | 0   | 0   | 0   | 0.1 | 0   | 0.1 | 0   | 0   | 0  | 0.1 | 0  | 0  | 0  | 0  | 0  | 0  | 0  |
| T | NA  | 0.2 | 0   | 0   | 0   | 0   | 0.1 | 0.1 | 0   | 0   | 0   | 0   | 0   | 0   | 0   | 0   | 0  | 0   | 0  | 0  | 0  | 0  | 0  | 0  | 0  |

**c. Average DAMRatios with weak promoter**

| 5'-UTR position |     |     |     |     |     |     |     |     |     |     |     |     |     |     |     |     |    |    |    |    |    |    |    |    |    |
|-----------------|-----|-----|-----|-----|-----|-----|-----|-----|-----|-----|-----|-----|-----|-----|-----|-----|----|----|----|----|----|----|----|----|----|
|                 | -25 | -24 | -23 | -22 | -21 | -20 | -19 | -18 | -17 | -16 | -15 | -14 | -13 | -12 | -11 | -10 | -9 | -8 | -7 | -6 | -5 | -4 | -3 | -2 | -1 |

**Random sequence starting with A**

|   |     |     |     |     |     |     |     |     |     |     |     |     |     |     |     |     |     |     |     |     |     |     |     |     |     |
|---|-----|-----|-----|-----|-----|-----|-----|-----|-----|-----|-----|-----|-----|-----|-----|-----|-----|-----|-----|-----|-----|-----|-----|-----|-----|
| A | 0.4 | 0.4 | 0.5 | 0.5 | 0.5 | 0.4 | 0.5 | 0.4 | 0.4 | 0.4 | 0.4 | 0.5 | 0.5 | 0.5 | 0.5 | 0.5 | 0.5 | 0.5 | 0.5 | 0.5 | 0.4 | 0.5 | 0.5 | 0.4 | 0.4 |
| C | NA  | 0.3 | 0.4 | 0.3 | 0.3 | 0.3 | 0.3 | 0.3 | 0.3 | 0.3 | 0.3 | 0.3 | 0.3 | 0.3 | 0.3 | 0.3 | 0.3 | 0.4 | 0.4 | 0.4 | 0.4 | 0.4 | 0.4 | 0.4 | 0.4 |
| G | NA  | 0.5 | 0.5 | 0.4 | 0.3 | 0.3 | 0.3 | 0.4 | 0.4 | 0.4 | 0.4 | 0.4 | 0.3 | 0.3 | 0.3 | 0.3 | 0.3 | 0.3 | 0.3 | 0.3 | 0.4 | 0.4 | 0.4 | 0.3 | 0.3 |
| T | NA  | 0.4 | 0.3 | 0.4 | 0.4 | 0.5 | 0.5 | 0.5 | 0.5 | 0.4 | 0.4 | 0.4 | 0.4 | 0.4 | 0.5 | 0.4 | 0.4 | 0.4 | 0.4 | 0.4 | 0.4 | 0.4 | 0.3 | 0.4 | 0.6 |

**Random sequence starting with C**

|   |     |     |     |     |     |     |     |     |     |     |     |     |     |     |     |     |     |     |     |     |     |     |     |     |     |
|---|-----|-----|-----|-----|-----|-----|-----|-----|-----|-----|-----|-----|-----|-----|-----|-----|-----|-----|-----|-----|-----|-----|-----|-----|-----|
| A | NA  | 0.4 | 0.4 | 0.4 | 0.4 | 0.4 | 0.4 | 0.4 | 0.3 | 0.3 | 0.4 | 0.4 | 0.4 | 0.4 | 0.4 | 0.4 | 0.4 | 0.4 | 0.4 | 0.4 | 0.4 | 0.4 | 0.4 | 0.4 | 0.3 |
| C | 0.3 | 0.2 | 0.3 | 0.3 | 0.3 | 0.2 | 0.2 | 0.2 | 0.2 | 0.3 | 0.3 | 0.3 | 0.3 | 0.3 | 0.3 | 0.3 | 0.3 | 0.3 | 0.3 | 0.3 | 0.3 | 0.3 | 0.3 | 0.3 | 0.3 |
| G | NA  | 0.4 | 0.4 | 0.3 | 0.3 | 0.3 | 0.3 | 0.3 | 0.3 | 0.3 | 0.3 | 0.3 | 0.3 | 0.3 | 0.3 | 0.3 | 0.3 | 0.3 | 0.3 | 0.3 | 0.3 | 0.3 | 0.3 | 0.3 | 0.2 |
| T | NA  | 0.3 | 0.2 | 0.3 | 0.3 | 0.4 | 0.4 | 0.4 | 0.4 | 0.4 | 0.4 | 0.4 | 0.3 | 0.3 | 0.4 | 0.4 | 0.4 | 0.3 | 0.3 | 0.3 | 0.4 | 0.3 | 0.3 | 0.3 | 0.5 |

**Random sequence starting with G**

|   |     |     |     |     |     |     |     |     |     |     |     |     |     |     |     |     |     |     |     |     |     |     |     |     |     |
|---|-----|-----|-----|-----|-----|-----|-----|-----|-----|-----|-----|-----|-----|-----|-----|-----|-----|-----|-----|-----|-----|-----|-----|-----|-----|
| A | NA  | 0.6 | 0.7 | 0.7 | 0.7 | 0.7 | 0.6 | 0.6 | 0.6 | 0.6 | 0.6 | 0.6 | 0.6 | 0.6 | 0.7 | 0.7 | 0.7 | 0.7 | 0.7 | 0.7 | 0.6 | 0.7 | 0.7 | 0.6 | 0.6 |
| C | NA  | 0.5 | 0.5 | 0.5 | 0.5 | 0.5 | 0.5 | 0.5 | 0.5 | 0.5 | 0.5 | 0.6 | 0.6 | 0.6 | 0.6 | 0.5 | 0.5 | 0.5 | 0.6 | 0.6 | 0.6 | 0.6 | 0.5 | 0.5 | 0.6 |
| G | 0.6 | 0.7 | 0.6 | 0.6 | 0.5 | 0.5 | 0.5 | 0.6 | 0.6 | 0.6 | 0.6 | 0.5 | 0.5 | 0.4 | 0.5 | 0.5 | 0.5 | 0.5 | 0.5 | 0.5 | 0.6 | 0.6 | 0.5 | 0.6 | 0.4 |
| T | NA  | 0.5 | 0.5 | 0.6 | 0.6 | 0.7 | 0.7 | 0.7 | 0.6 | 0.6 | 0.6 | 0.6 | 0.6 | 0.6 | 0.6 | 0.6 | 0.6 | 0.6 | 0.6 | 0.6 | 0.6 | 0.6 | 0.5 | 0.6 | 0.8 |

**Random sequence starting with T**

|   |     |     |     |     |     |     |     |     |     |     |     |     |     |     |     |     |     |     |     |     |     |     |     |     |     |
|---|-----|-----|-----|-----|-----|-----|-----|-----|-----|-----|-----|-----|-----|-----|-----|-----|-----|-----|-----|-----|-----|-----|-----|-----|-----|
| A | NA  | 0.6 | 0.6 | 0.5 | 0.5 | 0.5 | 0.5 | 0.5 | 0.5 | 0.5 | 0.4 | 0.5 | 0.5 | 0.5 | 0.5 | 0.5 | 0.5 | 0.5 | 0.5 | 0.5 | 0.5 | 0.5 | 0.6 | 0.4 | 0.4 |
| C | NA  | 0.2 | 0.4 | 0.3 | 0.3 | 0.3 | 0.3 | 0.3 | 0.3 | 0.3 | 0.4 | 0.4 | 0.4 | 0.4 | 0.3 | 0.3 | 0.3 | 0.4 | 0.4 | 0.4 | 0.4 | 0.4 | 0.4 | 0.4 | 0.4 |
| G | NA  | 0.3 | 0.4 | 0.4 | 0.4 | 0.4 | 0.4 | 0.4 | 0.4 | 0.4 | 0.4 | 0.4 | 0.4 | 0.3 | 0.3 | 0.3 | 0.4 | 0.3 | 0.3 | 0.3 | 0.4 | 0.4 | 0.4 | 0.4 | 0.3 |
| T | 0.4 | 0.2 | 0.3 | 0.4 | 0.4 | 0.5 | 0.5 | 0.5 | 0.5 | 0.4 | 0.4 | 0.5 | 0.4 | 0.5 | 0.5 | 0.5 | 0.5 | 0.5 | 0.4 | 0.5 | 0.4 | 0.4 | 0.3 | 0.4 | 0.6 |

**Average**

|   |     |     |     |     |     |     |     |     |     |     |     |     |     |     |     |     |     |     |     |     |     |     |     |     |     |
|---|-----|-----|-----|-----|-----|-----|-----|-----|-----|-----|-----|-----|-----|-----|-----|-----|-----|-----|-----|-----|-----|-----|-----|-----|-----|
|   | -25 | -24 | -23 | -22 | -21 | -20 | -19 | -18 | -17 | -16 | -15 | -14 | -13 | -12 | -11 | -10 | -9  | -8  | -7  | -6  | -5  | -4  | -3  | -2  | -1  |
| A | NA  | 0.5 | 0.5 | 0.5 | 0.5 | 0.5 | 0.5 | 0.5 | 0.5 | 0.5 | 0.5 | 0.5 | 0.5 | 0.5 | 0.5 | 0.5 | 0.5 | 0.5 | 0.5 | 0.5 | 0.5 | 0.5 | 0.6 | 0.5 | 0.4 |
| C | NA  | 0.3 | 0.4 | 0.3 | 0.3 | 0.3 | 0.3 | 0.3 | 0.3 | 0.4 | 0.4 | 0.4 | 0.4 | 0.4 | 0.4 | 0.4 | 0.4 | 0.4 | 0.4 | 0.4 | 0.4 | 0.4 | 0.4 | 0.4 | 0.4 |
| G | NA  | 0.5 | 0.4 | 0.4 | 0.4 | 0.4 | 0.4 | 0.4 | 0.4 | 0.4 | 0.4 | 0.4 | 0.4 | 0.4 | 0.3 | 0.3 | 0.4 | 0.3 | 0.4 | 0.4 | 0.4 | 0.4 | 0.4 | 0.4 | 0.3 |
| T | NA  | 0.4 | 0.3 | 0.4 | 0.5 | 0.5 | 0.5 | 0.5 | 0.5 | 0.5 | 0.5 | 0.5 | 0.5 | 0.5 | 0.5 | 0.5 | 0.5 | 0.5 | 0.4 | 0.5 | 0.5 | 0.4 | 0.4 | 0.5 | 0.6 |

**Standard deviation**

|   |     |     |     |     |     |     |     |     |     |     |     |     |     |     |     |     |     |     |     |     |     |     |     |     |     |
|---|-----|-----|-----|-----|-----|-----|-----|-----|-----|-----|-----|-----|-----|-----|-----|-----|-----|-----|-----|-----|-----|-----|-----|-----|-----|
|   | -25 | -24 | -23 | -22 | -21 | -20 | -19 | -18 | -17 | -16 | -15 | -14 | -13 | -12 | -11 | -10 | -9  | -8  | -7  | -6  | -5  | -4  | -3  | -2  | -1  |
| A | NA  | 0.1 | 0.1 | 0.1 | 0.1 | 0.1 | 0.1 | 0.1 | 0.1 | 0.1 | 0.1 | 0.1 | 0.1 | 0.1 | 0.1 | 0.1 | 0.1 | 0.1 | 0.1 | 0.1 | 0.1 | 0.1 | 0.1 | 0.1 | 0.1 |
| C | NA  | 0.1 | 0.1 | 0.1 | 0.1 | 0.1 | 0.1 | 0.1 | 0.1 | 0.1 | 0.1 | 0.1 | 0.1 | 0.1 | 0.1 | 0.1 | 0.1 | 0.1 | 0.1 | 0.1 | 0.1 | 0.1 | 0.1 | 0.1 | 0.1 |
| G | NA  | 0.2 | 0.1 | 0.1 | 0.1 | 0.1 | 0.1 | 0.1 | 0.1 | 0.1 | 0.1 | 0.1 | 0.1 | 0.1 | 0.1 | 0.1 | 0.1 | 0.1 | 0.1 | 0.1 | 0.1 | 0.1 | 0.1 | 0.1 | 0.1 |
| T | NA  | 0.1 | 0.1 | 0.1 | 0.1 | 0.1 | 0.1 | 0.1 | 0.1 | 0.1 | 0.1 | 0.1 | 0.1 | 0.1 | 0.1 | 0.1 | 0.1 | 0.1 | 0.1 | 0.1 | 0.1 | 0.1 | 0.1 | 0.1 | 0.1 |

**d. Normalized DAMRatios within subgroups of weak promoter**

| 5'-UTR position |     |     |     |     |     |     |     |     |     |     |     |     |     |     |     |     |    |    |    |    |    |    |    |    |    |
|-----------------|-----|-----|-----|-----|-----|-----|-----|-----|-----|-----|-----|-----|-----|-----|-----|-----|----|----|----|----|----|----|----|----|----|
|                 | -25 | -24 | -23 | -22 | -21 | -20 | -19 | -18 | -17 | -16 | -15 | -14 | -13 | -12 | -11 | -10 | -9 | -8 | -7 | -6 | -5 | -4 | -3 | -2 | -1 |

**Random sequence starting with A**

|   |    |     |     |     |     |     |     |     |     |     |     |     |     |     |     |     |     |     |     |     |     |     |     |     |     |
|---|----|-----|-----|-----|-----|-----|-----|-----|-----|-----|-----|-----|-----|-----|-----|-----|-----|-----|-----|-----|-----|-----|-----|-----|-----|
| A | 1  | 1   | 1.2 | 1.2 | 1.2 | 1.1 | 1.1 | 1.1 | 1.1 | 1.1 | 1.1 | 1.1 | 1.2 | 1.2 | 1.2 | 1.2 | 1.2 | 1.2 | 1.1 | 1.1 | 1.1 | 1.2 | 1.3 | 1.1 | 1   |
| C | NA | 0.7 | 0.9 | 0.8 | 0.7 | 0.7 | 0.7 | 0.7 | 0.8 | 0.8 | 0.8 | 0.8 | 0.8 | 0.8 | 0.8 | 0.8 | 0.8 | 0.9 | 0.9 | 0.9 | 0.9 | 0.9 | 0.9 | 1   | 0.9 |
| G | NA | 1.3 | 1.1 | 0.9 | 0.9 | 0.8 | 0.8 | 0.9 | 0.9 | 1   | 1   | 0.9 | 0.8 | 0.8 | 0.7 | 0.7 | 0.8 | 0.8 | 0.8 | 0.9 | 0.9 | 0.9 | 1   | 0.8 | 0.7 |



### Supplementary Table 17. Shine-Dalgarno sequence effect on the translation screens

The sequences are divided into two groups: with or without Shine-Dalgarno (SD)-like sequence (GAGG, GGAG, GAAG, and AGGA) scanning from -20 bps upstream the ATG. Then sequences are also binned according to their 5'-UTR folding energies (0-55 nt). We only analysed those 5'-UTR sequences having no alternative ATG.

#### Strong promoter

| Bin    | SD                       |       |                | No SD                    |       |                | T-test   | Folding energy            |                  |
|--------|--------------------------|-------|----------------|--------------------------|-------|----------------|----------|---------------------------|------------------|
|        | Average DAMRatio (log10) | Stdev | # of sequences | Average DAMRatio (log10) | Stdev | # of sequences |          | Average $\Delta G$ (0-55) | Stdev $\Delta G$ |
| 1      | 0.68                     | 0.89  | 2198           | 0.57                     | 0.85  | 10602          | 2.47E-08 | -11.50                    | 0.59             |
| 2      | 1.21                     | 0.93  | 1632           | 1.10                     | 0.90  | 11014          | 7.92E-06 | -8.79                     | 1.12             |
| 3      | 1.44                     | 0.90  | 1444           | 1.30                     | 0.90  | 11160          | 6.01E-08 | -7.36                     | 1.32             |
| 4      | 1.58                     | 0.88  | 1209           | 1.42                     | 0.92  | 11404          | 1.56E-08 | -6.10                     | 1.44             |
| 5      | 1.62                     | 0.89  | 900            | 1.49                     | 0.92  | 11757          | 5.62E-05 | -4.54                     | 1.50             |
| No bin | 1.21                     | 0.97  | 7383           | 1.19                     | 0.96  | 55937          | 1.06E-01 |                           |                  |

#### Weak promoter

| Bin    | SD                       |       |                | No SD                    |       |                | T-test   | Folding energy            |                  |
|--------|--------------------------|-------|----------------|--------------------------|-------|----------------|----------|---------------------------|------------------|
|        | Average DAMRatio (log10) | Stdev | # of sequences | Average DAMRatio (log10) | Stdev | # of sequences |          | Average $\Delta G$ (0-55) | Stdev $\Delta G$ |
| 1      | 0.13                     | 0.43  | 1661           | 0.11                     | 0.41  | 8058           | 7.87E-02 | -11.52                    | 0.11             |
| 2      | 0.36                     | 0.55  | 1250           | 0.31                     | 0.52  | 8347           | 1.09E-03 | -8.95                     | 0.31             |
| 3      | 0.55                     | 0.60  | 1145           | 0.46                     | 0.59  | 8470           | 2.02E-06 | -7.56                     | 0.47             |
| 4      | 0.65                     | 0.62  | 1022           | 0.58                     | 0.63  | 8781           | 7.66E-04 | -6.29                     | 0.59             |
| 5      | 0.79                     | 0.65  | 844            | 0.72                     | 0.70  | 9220           | 3.45E-03 | -4.69                     | 0.72             |
| No bin | 0.44                     | 0.61  | 5922           | 0.45                     | 0.62  | 42876          | 8.47E-01 |                           |                  |



### Supplementary Table 18. Overall base preference of N7 and N8 dam mRNAs

The numbers represent the total number of sequences that have the indicated bases at each position in RNA-seq. For N7 and N8 mRNAs (starting at natural +1 and +2, respectively), sequences are aligned to the experimentally determined TSS (position +1). The numbering on top is based on the randomized positions (N25) after the promoter. Sequences having an identical TSS in both RNA-seq approaches were used.

#### a. Common TSSs from RNA-seq experiments

| N7 | 1    | 2    | 3    | 4    | 5    | 6    | 7    | 8    | 9    | 10   | 11   | 12   | 13   | 14   | 15   | 16   | 17   | 18   | 19   | 20   | 21   | 22   | 23   | 24   | 25   | 26   |
|----|------|------|------|------|------|------|------|------|------|------|------|------|------|------|------|------|------|------|------|------|------|------|------|------|------|------|
| A  | 0    | 69   | 2258 | 1558 | 1607 | 1470 | 1319 | 1353 | 1383 | 1470 | 1393 | 1392 | 1497 | 1398 | 1440 | 1361 | 1269 | 1478 | 1617 | 1762 | 1364 | 1351 | 1393 | 1308 | 1264 | 1605 |
| C  | 0    | 4188 | 849  | 976  | 952  | 1055 | 987  | 951  | 946  | 924  | 1059 | 1029 | 1032 | 1067 | 1028 | 1161 | 1158 | 1341 | 1156 | 1030 | 1127 | 1063 | 1106 | 958  | 986  | 947  |
| G  | 0    | 176  | 1153 | 958  | 1045 | 1048 | 1051 | 931  | 1010 | 972  | 919  | 845  | 707  | 767  | 753  | 795  | 709  | 605  | 672  | 710  | 900  | 999  | 916  | 977  | 1137 | 1105 |
| T  | 4637 | 204  | 377  | 1145 | 1033 | 1064 | 1280 | 1402 | 1298 | 1271 | 1266 | 1371 | 1401 | 1405 | 1416 | 1320 | 1501 | 1213 | 1192 | 1135 | 1246 | 1224 | 1222 | 1394 | 1250 | 980  |

| N8 | 1    | 2    | 3    | 4    | 5    | 6    | 7    | 8    | 9    | 10   | 11   | 12   | 13   | 14   | 15   | 16   | 17   | 18   | 19   | 20   | 21   | 22   | 23   | 24   | 25   |
|----|------|------|------|------|------|------|------|------|------|------|------|------|------|------|------|------|------|------|------|------|------|------|------|------|------|
| A  | 8148 | 1707 | 3133 | 3182 | 3242 | 3172 | 2958 | 2921 | 2999 | 2924 | 2833 | 2961 | 3260 | 2996 | 2975 | 3111 | 2873 | 3414 | 3872 | 2811 | 2768 | 2953 | 2636 | 2830 | 3550 |
| C  | 9    | 2906 | 1971 | 2435 | 2073 | 1941 | 2070 | 1989 | 2151 | 2231 | 2231 | 2301 | 2290 | 2161 | 2209 | 2268 | 3105 | 2610 | 2196 | 2380 | 2429 | 2339 | 2107 | 2192 | 2091 |
| G  | 1578 | 1546 | 2722 | 1954 | 2023 | 2338 | 2260 | 2061 | 1990 | 1975 | 1841 | 1659 | 1348 | 1513 | 1720 | 1618 | 1398 | 1325 | 1494 | 1979 | 2096 | 1909 | 2065 | 2280 | 2202 |
| T  | 128  | 3704 | 2037 | 2292 | 2525 | 2412 | 2575 | 2892 | 2723 | 2733 | 2958 | 2942 | 2965 | 3193 | 2959 | 2866 | 2487 | 2514 | 2301 | 2693 | 2570 | 2662 | 3055 | 2561 | 2020 |

#### b. TSSs from the 1st RNA-seq approach

| N7 | 1     | 2    | 3    | 4    | 5    | 6    | 7    | 8    | 9    | 10   | 11   | 12   | 13   | 14   | 15   | 16   | 17   | 18   | 19   | 20   | 21   | 22   | 23   | 24   | 25   | 26   |
|----|-------|------|------|------|------|------|------|------|------|------|------|------|------|------|------|------|------|------|------|------|------|------|------|------|------|------|
| A  | 0     | 2289 | 6832 | 5314 | 5453 | 4550 | 4438 | 4767 | 4798 | 4971 | 4745 | 4858 | 5247 | 4661 | 4907 | 4565 | 4187 | 5114 | 5500 | 5896 | 4656 | 4440 | 4756 | 4230 | 4302 | 5445 |
| C  | 0     | 8425 | 2893 | 3258 | 2922 | 3224 | 3460 | 3046 | 3065 | 3019 | 3458 | 3434 | 3251 | 3251 | 3268 | 3706 | 3839 | 4186 | 3774 | 3335 | 3613 | 3635 | 3566 | 3379 | 3352 | 3272 |
| G  | 0     | 3058 | 3131 | 2822 | 3169 | 3845 | 3088 | 2887 | 3351 | 3131 | 2901 | 2669 | 2478 | 2758 | 2445 | 2552 | 2339 | 1981 | 2282 | 2220 | 2946 | 3168 | 3002 | 3218 | 3640 | 3474 |
| T  | 15327 | 1555 | 2471 | 3933 | 3783 | 3708 | 4341 | 4627 | 4113 | 4206 | 4223 | 4366 | 4351 | 4657 | 4707 | 4504 | 4962 | 4046 | 3771 | 3876 | 4112 | 4084 | 4003 | 4500 | 4033 | 3136 |

| N8 | 1     | 2    | 3    | 4    | 5    | 6    | 7    | 8    | 9    | 10   | 11   | 12   | 13   | 14   | 15   | 16   | 17   | 18   | 19   | 20   | 21   | 22   | 23   | 24   | 25   |
|----|-------|------|------|------|------|------|------|------|------|------|------|------|------|------|------|------|------|------|------|------|------|------|------|------|------|
| A  | 14897 | 4221 | 6558 | 6727 | 6797 | 6700 | 6126 | 6201 | 6336 | 6039 | 6082 | 6288 | 6950 | 6221 | 6354 | 6623 | 6048 | 7148 | 8076 | 5991 | 5886 | 6207 | 5557 | 5950 | 7389 |
| C  | 207   | 5885 | 4222 | 4697 | 4224 | 3958 | 4402 | 4309 | 4470 | 4670 | 4676 | 4728 | 4743 | 4567 | 4669 | 4697 | 6453 | 5349 | 4563 | 4919 | 5042 | 4860 | 4542 | 4506 | 4320 |
| G  | 4302  | 3587 | 4723 | 3818 | 3858 | 4627 | 4536 | 4141 | 4147 | 4158 | 3735 | 3414 | 2736 | 3149 | 3428 | 3317 | 2845 | 2750 | 3134 | 3977 | 4271 | 4041 | 4163 | 4747 | 4597 |
| T  | 1185  | 6898 | 5088 | 5349 | 5712 | 5306 | 5527 | 5940 | 5638 | 5724 | 6098 | 6161 | 6162 | 6654 | 6140 | 5954 | 5245 | 5344 | 4818 | 5704 | 5392 | 5483 | 6329 | 5388 | 4285 |

**c. TSSs from the 2nd RNA-seq approach**

| <b>N7</b> | 1    | 2    | 3    | 4    | 5    | 6    | 7    | 8    | 9    | 10   | 11   | 12   | 13   | 14   | 15   | 16   | 17   | 18   | 19   | 20   | 21   | 22   | 23   | 24   | 25   | 26   |
|-----------|------|------|------|------|------|------|------|------|------|------|------|------|------|------|------|------|------|------|------|------|------|------|------|------|------|------|
| A         | 0    | 454  | 3669 | 2784 | 2831 | 2648 | 2344 | 2445 | 2526 | 2588 | 2439 | 2500 | 2606 | 2533 | 2535 | 2425 | 2367 | 2655 | 2857 | 3159 | 2471 | 2416 | 2495 | 2353 | 2280 | 2848 |
| C         | 0    | 6250 | 1588 | 1755 | 1731 | 1781 | 1742 | 1691 | 1612 | 1604 | 1869 | 1781 | 1793 | 1857 | 1812 | 1967 | 1977 | 2342 | 2023 | 1799 | 1982 | 1840 | 1936 | 1718 | 1770 | 1686 |
| G         | 0    | 513  | 2097 | 1623 | 1772 | 1743 | 1833 | 1579 | 1729 | 1686 | 1604 | 1468 | 1317 | 1328 | 1268 | 1376 | 1213 | 1056 | 1137 | 1233 | 1537 | 1719 | 1586 | 1678 | 1937 | 1875 |
| T         | 8195 | 978  | 841  | 2033 | 1861 | 2023 | 2276 | 2480 | 2328 | 2317 | 2283 | 2446 | 2479 | 2477 | 2580 | 2427 | 2638 | 2142 | 2178 | 2004 | 2205 | 2220 | 2178 | 2446 | 2208 | 1786 |

| <b>N8</b> | 1     | 2    | 3    | 4    | 5    | 6    | 7    | 8    | 9    | 10   | 11   | 12   | 13   | 14   | 15   | 16   | 17   | 18   | 19   | 20   | 21   | 22   | 23   | 24   | 25   |
|-----------|-------|------|------|------|------|------|------|------|------|------|------|------|------|------|------|------|------|------|------|------|------|------|------|------|------|
| A         | 13334 | 4418 | 6211 | 5807 | 5692 | 5697 | 5604 | 5570 | 5589 | 5499 | 5443 | 5678 | 5816 | 5566 | 5392 | 5517 | 5690 | 6440 | 7187 | 5295 | 5180 | 5441 | 4891 | 5205 | 6406 |
| C         | 201   | 4999 | 3516 | 4176 | 3853 | 3730 | 3645 | 3549 | 3844 | 4007 | 3991 | 3972 | 4027 | 3880 | 4075 | 4179 | 5382 | 4631 | 3910 | 4327 | 4352 | 4203 | 3957 | 3975 | 3804 |
| G         | 3926  | 2817 | 4465 | 3754 | 3983 | 3997 | 3988 | 3858 | 3621 | 3523 | 3273 | 3042 | 2715 | 2779 | 3033 | 2898 | 2447 | 2391 | 2607 | 3512 | 3779 | 3466 | 3672 | 3992 | 3997 |
| T         | 594   | 5821 | 3863 | 4318 | 4527 | 4631 | 4818 | 5078 | 5001 | 5026 | 5348 | 5363 | 5497 | 5830 | 5555 | 5461 | 4536 | 4593 | 4351 | 4921 | 4744 | 4945 | 5535 | 4883 | 3848 |

### Supplementary Table 19. Average RNA copy number in function of base identity at each position

RNA copy number from two RNA-seq experiments were combined and normalized by DNA copy number from the 'uncut' library (Combined RNA TPM / log10(DNACopy)) (Arbitrary units) in the two translation screens. TPM is 'transcripts per million' (number of RNA-seq reads for certain constructs / total RNA-seq reads \* 10<sup>6</sup>, see Methods). The 5'-UTR positions are numbered with respect to the ATG.

| 5'-UTR position |     |     |     |     |     |     |     |     |     |     |     |     |     |     |     |    |    |    |    |    |    |    |    |    |
|-----------------|-----|-----|-----|-----|-----|-----|-----|-----|-----|-----|-----|-----|-----|-----|-----|----|----|----|----|----|----|----|----|----|
| -25             | -24 | -23 | -22 | -21 | -20 | -19 | -18 | -17 | -16 | -15 | -14 | -13 | -12 | -11 | -10 | -9 | -8 | -7 | -6 | -5 | -4 | -3 | -2 | -1 |

#### a. Strong promoter

|   |      |      |      |      |      |      |      |      |      |      |      |      |      |      |      |      |      |      |      |      |      |      |      |      |
|---|------|------|------|------|------|------|------|------|------|------|------|------|------|------|------|------|------|------|------|------|------|------|------|------|
| A | 0.91 | 0.86 | 0.86 | 0.86 | 0.87 | 0.86 | 0.86 | 0.86 | 0.86 | 0.86 | 0.86 | 0.86 | 0.86 | 0.86 | 0.86 | 0.86 | 0.86 | 0.86 | 0.86 | 0.86 | 0.86 | 0.87 | 0.86 | 0.86 |
| C | 0.86 | 0.87 | 0.85 | 0.87 | 0.86 | 0.86 | 0.86 | 0.86 | 0.86 | 0.86 | 0.87 | 0.86 | 0.87 | 0.86 | 0.86 | 0.87 | 0.87 | 0.87 | 0.86 | 0.86 | 0.86 | 0.86 | 0.86 | 0.86 |
| G | 0.83 | 0.86 | 0.90 | 0.88 | 0.87 | 0.87 | 0.87 | 0.87 | 0.87 | 0.87 | 0.86 | 0.86 | 0.86 | 0.87 | 0.87 | 0.87 | 0.87 | 0.86 | 0.86 | 0.86 | 0.86 | 0.86 | 0.86 | 0.86 |
| T | 0.80 | 0.86 | 0.84 | 0.84 | 0.85 | 0.85 | 0.85 | 0.85 | 0.85 | 0.86 | 0.86 | 0.86 | 0.86 | 0.86 | 0.86 | 0.86 | 0.86 | 0.86 | 0.86 | 0.86 | 0.86 | 0.86 | 0.86 | 0.87 |

#### b. Weak promoter

|   |      |      |      |      |      |      |      |      |      |      |      |      |      |      |      |      |      |      |      |      |      |      |      |      |      |
|---|------|------|------|------|------|------|------|------|------|------|------|------|------|------|------|------|------|------|------|------|------|------|------|------|------|
| A | 0.85 | 0.91 | 0.90 | 0.91 | 0.91 | 0.91 | 0.91 | 0.91 | 0.91 | 0.90 | 0.91 | 0.91 | 0.91 | 0.91 | 0.91 | 0.90 | 0.91 | 0.91 | 0.91 | 0.91 | 0.91 | 0.91 | 0.92 | 0.91 | 0.91 |
| C | 0.95 | 0.88 | 0.93 | 0.91 | 0.91 | 0.91 | 0.91 | 0.91 | 0.91 | 0.91 | 0.91 | 0.91 | 0.91 | 0.91 | 0.90 | 0.91 | 0.91 | 0.91 | 0.91 | 0.91 | 0.91 | 0.91 | 0.91 | 0.91 | 0.91 |
| G | 0.89 | 0.97 | 0.93 | 0.92 | 0.92 | 0.91 | 0.91 | 0.91 | 0.91 | 0.92 | 0.92 | 0.91 | 0.92 | 0.91 | 0.91 | 0.92 | 0.91 | 0.91 | 0.91 | 0.91 | 0.91 | 0.91 | 0.91 | 0.91 | 0.91 |
| T | 0.93 | 0.85 | 0.87 | 0.89 | 0.90 | 0.91 | 0.91 | 0.91 | 0.91 | 0.90 | 0.90 | 0.91 | 0.90 | 0.90 | 0.91 | 0.91 | 0.91 | 0.90 | 0.90 | 0.90 | 0.91 | 0.90 | 0.90 | 0.91 | 0.91 |

### Supplementary Table 20. RNA-seq counts for validation 5'-UTRs

Dam-specific RNA-seq of eight 5'-UTRs from the translation screen. Numbers are read counts, not barcode counts. N7 and N8 indicate the number of reads starting from the theoretical TSS (+1) and +2, respectively. As we found a possible contamination from the 5'-UTR pool of UTR1-8 in RNA-seq approach 1, we do show the read counts only for the second approach. See also Supplementary Table 19 legend.

| ID   | UTR8 Pool     |               |        | ELM-seq Exp1 |      |      | ELM-seq Exp2 |      |      | RNA-seq Exp2 |      |      | Combined DAMRatio | DNACopy TPM 1 | DNACopy TPM 2 | Combined DNA CopyTPM | RNACopy TPM 2 | Normalized RNA CopyTPM |
|------|---------------|---------------|--------|--------------|------|------|--------------|------|------|--------------|------|------|-------------------|---------------|---------------|----------------------|---------------|------------------------|
|      | N7 RNA counts | N8 RNA counts | Sum    | uncut        | Dpnl | Mbol | uncut        | Dpnl | Mbol | N7 3         | N8 3 | Sum  |                   |               |               |                      |               |                        |
| UTR1 | 5881          | 559121        | 620240 | 48           | 0    | 149  | 42           | 17   | 255  | 34           | 1049 | 1255 | 2.62              | 4.28E+03      | 3.90E+03      | 1.20E+01             | 1.23E+04      | 1.14E+04               |
| UTR2 | 2485          | 240304        | 272439 | 35           | 4    | 114  | 26           | 2    | 70   | 108          | 2106 | 2399 | 2.54              | 3.12E+03      | 2.41E+03      | 1.14E+01             | 2.35E+04      | 2.22E+04               |
| UTR3 | 357157        | 8479          | 393825 | 62           | 7    | 145  | 64           | 12   | 162  | 4750         | 324  | 5263 | 2.14              | 5.52E+03      | 5.94E+03      | 1.25E+01             | 5.15E+04      | 4.70E+04               |
| UTR4 | 10098         | 147995        | 167262 | 67           | 19   | 249  | 1            | 1    | 17   | 95           | 3421 | 3791 | 2.27              | 5.97E+03      | 9.29E+01      | 9.54E+00             | 3.71E+04      | 3.79E+04               |
| UTR5 | 163           | 64            | 102933 | 334          | 87   | 684  | 157          | 26   | 320  | 0            | 0    | 850  | 1.94              | 2.98E+04      | 1.46E+04      | 1.43E+01             | 8.33E+03      | 7.20E+03               |
| UTR6 | 99476         | 1530          | 153984 | 209          | 152  | 247  | 102          | 55   | 119  | 167          | 0    | 421  | 1.23              | 1.86E+04      | 9.47E+03      | 1.37E+01             | 4.12E+03      | 3.63E+03               |
| UTR7 | 104940        | 1577          | 111376 | 68           | 138  | 17   | 24           | 18   | 102  | 237          | 0    | 237  | 0.88              | 6.06E+03      | 2.23E+03      | 1.18E+01             | 2.32E+03      | 2.16E+03               |
| UTR8 | 263           | 583           | 4415   | 187          | 364  | 23   | 38           | 11   | 251  | 0            | 0    | 0    | 1.03              | 1.67E+04      | 3.53E+03      | 1.29E+01             | 0.00E+00      | 0.00E+00               |

## Supplementary Note 1. Library cloning and sequencing

**Library cloning.** The number of possible DNA sequences was  $4^{32}$  ( $10^{19}$ ) for the promoter and  $4^{25}$  ( $10^{15}$ ) in the case of the 5'-UTR libraries. In order to obtain sufficient variability in the random sequences, we followed the strategy detailed below. The random part of the sequence was ordered as any base or "N" in the oligonucleotides to the manufacturer (maintaining the normal GC content of *M. pneumoniae*, i.e., ca. 40%). In the case of the transcription screen, the oligo with the random sequence was used to amplify *dam* (Supplementary Fig. 11). In this way, a different sequence was introduced in each PCR cycle. In the case of the translation screen the random sequence was introduced as a linker, in which the second strand was made by primer extension (Supplementary Fig. 11).

From the controls of *E. coli* transformation efficiency (about  $10^9$  cells per  $\mu\text{g}$  DNA) we estimated approximately 1 million colonies were obtained per construct. This is consistent with the number of different sequences that were obtained in the sequencing output. Nevertheless, not all the sequences were used after applying the filter in the DAMRatio calculation (see Methods).

**Library sequencing.** The setup of the DNA-seq and RNA-seq deep sequencing strategies are shown schematically in Supplementary Fig. 12. We used customized oligos with the Illumina flow cell binding (P5 and P7) and sequencing (SEQ) regions. In the case of DNA-seq, there was only one step (PCR amplification from genomic DNA, digested with either DpnI or MboI) needed to obtain a library for sequencing the *Dam* cassette. In the case of RNA-seq however, we tested two strategies to enable sequencing of the *dam* mRNA. In one case, the "specificity" was achieved by *dam* specific RT, while in the other, it was introduced in the last step (by PCR from bulk cDNA; see Supplementary Note 3). It should be noted that a random sequence of six bases was introduced in the linker used for ligation of the ssDNA (or cDNA). The reason is that, like this, individual RNA species are also coded. In this way, we can remove (bioinformatically) the ones that arise from duplications of original sequences in the final PCR (that PCR needed to obtain the final libraries).

RNA-seq was only possible in the 5'-UTR screens, as the "barcode" (i.e., the N25 randomized sequence) is in the RNA itself.

## Supplementary Note 2. DAMRatio distribution fitting

With a mixture of Gaussian fitting, we obtained i- or tri-modal distributions of DAMRatios depending on the study. To understand this, we simulated our experimental scheme with some basic assumptions: (1) Expression from random sequences generates a Gaussian distribution of DAM expression. (2) There is more than one clone that has same sequence in the population. It is realistic that we might have more than one isogenic clone in the *M. pneumoniae* population. During the library preparation, we cloned random libraries into *E. coli* before extracting the DNA for *M. pneumoniae* transformation. Since we made two passages before extracting the DNA and amplifying it by PCR in the following step, we considered the number of average isogenic clones in the population is more than one (for the simulation we set this as ten). (3) A DNA methylation event in a single cell is considered as a random process - its probability is proportionally dependent on the concentration of Dam enzyme. Thus, we assume that methylation at one site does not affect the methylation of other sites. To model the methylation process, we used a sigmoid probability distribution of Dam amount along the cell cycle. As Dam expression increases, the probability of having DNA methylation also increases. (4) Similar as for Dam, restriction enzyme cutting was also modeled as a random process. In this way, sometimes DNA is not cut. We used a 95% cutting enzyme efficiency for the simulation. (5) PCR can also randomly amplify specific constructs. We set the amplification probability as 95% for each cycle, and ran 10 cycles.

Using these schemes, we obtained the same distribution in the simulation results (Supplementary Fig. 13). The enrichment of high- and low-productive clones can be explained by the partial methylation of the 4xGATC sites. If the GATC sites of a sequence are not fully methylated or unmethylated, then both DpnI and MboI are capable of cutting the reporter site. This consequently leads to fragments that cannot be amplified during the PCR step. Thus, we hypothesized that the enrichment of both types of (highly and lowly expressed) sequences is governed by the number of GATC sites. As expected, increasing the number of GATC sites resulted in an enrichment of both highly expressed promoters and lowly expressed ones (see Supplementary Fig. 13).

GATC sites could be hemimethylated if the cells have just replicated their DNA. DNA. Both DpnI and MboI are not capable of cutting the hemimethylated DNA (less than 2%)<sup>1-5</sup>. To test the possible impact of hemimethylation we run a simulation considering separated methylation events on each strand. Supplementary Fig. 14 shows the probability of being methylated or hemimethylated depending on the expression level of Dam. In summary, hemimethylation does not change the conclusions of the simulation described above. The only effect is that hemimethylated DNA can increase the number of reads coming from intermediate level expression of Dam (Supplementary Fig. 15).

### Supplementary Note 3. RNA-seq validation

The two RNA-seq approaches (see Supplementary Note 1) show a reasonable correlation (RNA1 and RNA2 in Supplementary Fig. 16).

The correlation of RNA-seq with Dam activity (DAMRatio) was significant, but not so good (Supplementary Fig. 16). This was expected as the determinants of RNA expression and translation are not the same. However, it is worth noting that when we look at the validation constructs (12 promoters and eight 5'-UTRs; RT-qPCR data in Supplementary Table 5), the correlation of DAMRatio with mRNA levels is  $r=0.44/0.25$  (two different qPCR oligos for *dam*). RNA shows also a good correlation with Dam protein levels as determined by LC-MSMS ( $r=0.73/0.83$ ).

We also performed another control to test the RNA-seq protocol. Briefly, equal amounts of the total RNA of the eight individually expressed 5'-UTR validation constructs (UTR1-8 in Supplementary Table 2) were pooled and the two RNA-seq approaches were applied. The amount of RNA produced by these constructs was determined by RT-qPCR. As it can be seen in Supplementary Table 20, the correlation of the *dam* mRNA counts found in the original libraries (corrected by the genomic DNA counts from the uncut sequencing of the reporter cassette) and the pooled 5'-UTRs (no need to correct, as they were normalized when pooling the same amount of total RNA of each 5'-UTR) is high ( $r=0.41$ ). As a matter of fact, there is also a correlation of the mRNA of the individual clones determined by qPCR with that obtained by RNA-seq in the pools ( $r = 0.84$  and  $0.68$  for the 2 sets of *dam* oligos), indicating that our customized mRNA-specific RNA-seq protocol reflects the original RNA present in the cell.

Regarding sequence determinants of the mRNA levels, the base preferences per position in the random sequence can be found in Supplementary Table 19. The only remarkable feature is an enrichment of ANG sequences (AYN in the weak promoter) at the beginning of the RNA (it has to be considered that the strong promoter usually starts at the first base of the randomized sequence while the weak promoter does so at one position before, that is, an A, thereby displacing this motif by one base). This could be related to the preference of the RNA polymerase for the first incorporated base. Nevertheless, this is not reflected in higher protein expression according to DAMRatio analysis (see base preferences in Fig. 3), indicating that there are other factors having greater influence over the *dam* translation.

#### **Supplementary Note 4. Alternative ATG effect on the translation**

A confounding factor in the analysis of the 5'-UTR sequences is the possible introduction of alternative TSCs in the random sequence. Alternative TSCs could hamper the translation of Dam by competing for access to the ribosome initiation complex. The theoretical probability of having alternative ATG sites in the library is significant (35.9%), and in fact, we found that 34.3% and 32% of the sequences have at least one ATG in the 5'-UTR for the strong and weak promoter screen, respectively. As expected, these alternative TSCs systematically reduced Dam activity (Supplementary Fig. 8a). The greatest reduction was seen in the cases where the TSCs were out-of-frame and closely located to the real one ( $\leq 12$  nt) (Supplementary Fig. 8b). In fact, the degree to which an alternative TISs affects the translation of the Dam depends on the distance between TISs. In agreement with this, we found that endogenous *M. pneumoniae* genes tend to be scarce in alternative ATGs near their TSCs ( $P = 1.43 \times 10^{-6}$ , Fisher's exact test; Supplementary Table 14). We further found that the nucleotides directly around the alternative TSCs also play a role (Supplementary Table 15 and Supplementary Fig. 8c,d).



## Supplementary References

- 1 Davis, T. B., Morgan, R. D., and Robinson, D. P. DpnI cleaves Hemimethylated DNA. *In Human Genome II, Official Program and Abstracts. San Deigo, CA.*, p. 26. (1990).
- 2 Hermann, A. & Jeltsch, A. Methylation sensitivity of restriction enzymes interacting with GATC sites. *Biotechniques* **34**, 924-926, 928, 930 (2003).
- 3 Nelson, M., Christ, C. & Schildkraut, I. Alteration of apparent restriction endonuclease recognition specificities by DNA methylases. *Nucleic Acids Res* **12**, 5165-5173 (1984).
- 4 Ono, A. & Ueda, T. Synthesis of decadeoxyribonucleotides containing N6-methyladenine, N4-methylcytosine, and 5-methylcytosine: recognition and cleavage by restriction endonucleases (nucleosides and nucleotides part 74). *Nucleic Acids Res* **15**, 219-232 (1987).
- 5 Streeck, R. E. Single-strand and double-strand cleavage at half-modified and fully modified recognition sites for the restriction nucleases Sau3a and Taqi. *Gene* **12**, 267-275 (1980).
- 6 Llorens-Rico, V., Lluch-Senar, M. & Serrano, L. Distinguishing between productive and abortive promoters using a random forest classifier in *Mycoplasma pneumoniae*. *Nucleic Acids Res* **43**, 3442-3453, doi:10.1093/nar/gkv170 (2015).
